# Supplementary material for: Folding oligomers of difluorinated thienylfurans: a DFT study
Source: Royal Society of Chemistry journal article supplement (doi:10.1039/b916415d), 2009-11-18
Supplement: b916415d.zip [file b916415d.zip]

Cartesian coordinates of B3LYP/6-31G(d) optimized geometries  
all-cisoid C2FOS-n, and all-transoid T2FOS-n, n = 1-6.  
Charge and multiplicity are given first.

C2FOS-1

0 1

|   |             |             |             |
|---|-------------|-------------|-------------|
| C | 2.21078400  | -1.46558200 | 0.00010900  |
| C | 0.40964800  | -0.15789900 | 0.00004400  |
| C | 1.51157500  | 0.65844800  | -0.00001300 |
| C | 2.66056700  | -0.18095100 | -0.00003400 |
| O | 0.84329300  | -1.45827700 | 0.00004500  |
| C | -1.00331000 | 0.11018900  | 0.00006500  |
| C | -3.49076200 | -0.04948000 | -0.00027900 |
| C | -3.04478300 | 1.24429500  | 0.00006300  |
| C | -1.62520200 | 1.34109100  | 0.00022300  |
| H | -1.07503300 | 2.27451100  | 0.00038600  |
| F | 1.51249500  | 1.99589100  | -0.00007200 |
| S | -2.17973900 | -1.18650800 | 0.00000900  |
| F | 3.92661100  | 0.23811300  | -0.00011700 |
| H | -3.70561900 | 2.10417100  | 0.00009200  |
| H | 2.69803400  | -2.42629100 | 0.00017700  |
| H | -4.51096300 | -0.40874400 | -0.00052600 |

C2FOS-2

0 1

|   |             |             |             |
|---|-------------|-------------|-------------|
| C | 5.11285900  | -2.20746800 | 0.00010100  |
| C | 3.88757500  | -0.34951500 | -0.00007200 |
| C | 5.20814000  | 0.02665500  | -0.00020800 |
| C | 5.98678300  | -1.16325800 | -0.00007700 |
| O | 3.83552900  | -1.71972700 | 0.00013900  |
| C | 2.66324000  | 0.39771400  | -0.00010700 |
| C | 0.27264100  | 1.13188300  | -0.00010600 |
| C | 1.16672500  | 2.18780900  | -0.00024500 |
| C | -1.15609100 | 1.20195800  | -0.00004800 |
| C | -3.22669700 | 0.34632900  | 0.00008000  |
| C | -3.34556200 | 1.71637100  | 0.00003300  |
| O | -1.88806400 | 0.03945100  | 0.00003300  |
| C | -2.03961200 | 2.25676300  | -0.00004500 |
| C | 2.51672000  | 1.77218300  | -0.00024400 |
| H | 3.36155700  | 2.45037400  | -0.00033800 |
| F | 5.67880500  | 1.27796100  | -0.00041500 |
| F | -4.48572100 | 2.41253300  | 0.00005800  |
| C | -4.19006400 | -0.71525800 | 0.00016100  |
| C | -5.35260000 | -2.92016900 | 0.00031400  |
| C | -6.22376500 | -1.86400800 | 0.00029300  |
| C | -5.56690700 | -0.60332500 | 0.00021200  |
| H | -6.07810400 | 0.35196500  | 0.00019300  |
| S | 1.10814500  | -0.40837400 | 0.00001000  |
| S | -3.69848000 | -2.39662400 | 0.00019900  |
| F | 7.31880500  | -1.21797800 | -0.00014000 |
| F | -1.72268800 | 3.55454300  | -0.00010600 |
| H | 0.84934700  | 3.22355600  | -0.00033700 |
| H | -7.30210100 | -1.97926700 | 0.00034300  |
| H | 5.23097000  | -3.27818800 | 0.00023700  |
| H | -5.57914400 | -3.97778300 | 0.00037700  |

## C2FOS-3

0 1

|   |             |             |             |
|---|-------------|-------------|-------------|
| C | 5.48460100  | 3.99191300  | -0.00055500 |
| C | 5.61778000  | 1.77048300  | -0.00005300 |
| C | 6.90039900  | 2.26110500  | 0.00041200  |
| C | 6.81016500  | 3.68021100  | 0.00013300  |
| O | 4.75467500  | 2.83598600  | -0.00059800 |
| C | 5.08585500  | 0.43862000  | -0.00001900 |
| C | 3.61344100  | -1.58223400 | 0.00003400  |
| C | 4.96272400  | -1.89119000 | 0.00024800  |
| C | 2.51327100  | -2.49468300 | -0.00003000 |
| C | 0.34343500  | -3.05417400 | -0.00014100 |
| C | 1.07315000  | -4.22247600 | -0.00023400 |
| O | 1.22996100  | -2.00442300 | 0.00000700  |
| C | 2.43993600  | -3.86990500 | -0.00014500 |
| C | 5.79331600  | -0.74928000 | 0.00023300  |
| H | 6.87607300  | -0.78496200 | 0.00038700  |
| F | 8.02709700  | 1.54171500  | 0.00105300  |
| F | 0.57859100  | -5.46300100 | -0.00037500 |
| C | -1.05989800 | -2.78606700 | -0.00018400 |
| C | -3.32478500 | -1.72338400 | -0.00010200 |
| C | -3.37167300 | -3.10751200 | -0.00030700 |
| C | -2.09462600 | -3.70679000 | -0.00032100 |
| H | -1.92660200 | -4.77703800 | -0.00043600 |
| C | -4.42814800 | -0.81468700 | 0.00005100  |
| C | -5.38248800 | 1.21264000  | 0.00015800  |
| C | -6.39340200 | 0.27990000  | 0.00047300  |
| C | -5.38068200 | 2.64587700  | 0.00000900  |
| C | -4.75877300 | 5.05928500  | -0.00052500 |
| C | -6.11390500 | 4.86342400  | 0.00003500  |
| O | -4.18640800 | 0.53805000  | -0.00011200 |
| C | -5.79228800 | -0.99866900 | 0.00047300  |
| C | -6.47525100 | 3.48875100  | 0.00038700  |
| H | -7.49557200 | 3.12439000  | 0.00087600  |
| F | -7.70505600 | 0.53335700  | 0.00077600  |
| S | 3.35821000  | 0.15151800  | -0.00022600 |
| S | -1.67118100 | -1.14335400 | -0.00005300 |
| S | -3.88626500 | 3.55969200  | -0.00074300 |
| F | 7.84315900  | 4.52280700  | 0.00045700  |
| F | 3.47335100  | -4.71613200 | -0.00018800 |
| F | -6.43269700 | -2.17066600 | 0.00078800  |
| H | 5.32984300  | -2.91035500 | 0.00041400  |
| H | -4.30212800 | -3.66241500 | -0.00041600 |
| H | -6.83448200 | 5.67387300  | 0.00024700  |
| H | 4.93732600  | 4.91975100  | -0.00101600 |
| H | -4.21541100 | 5.99447800  | -0.00084500 |

## C2FOS-4

0 1

|   |            |            |             |
|---|------------|------------|-------------|
| C | 3.43205200 | 5.25894000 | -0.82675300 |
| C | 4.89978300 | 3.63990800 | -0.40518900 |
| C | 5.58967400 | 4.82701500 | -0.42871700 |
| C | 4.64817700 | 5.85798800 | -0.69848300 |
| O | 3.57800000 | 3.91137300 | -0.64949400 |

|   |             |             |             |
|---|-------------|-------------|-------------|
| C | 5.30537800  | 2.28110400  | -0.19051500 |
| C | 5.39968100  | -0.19945500 | 0.10679700  |
| C | 6.63906400  | 0.40874500  | 0.20763800  |
| C | 5.10366900  | -1.59374400 | 0.21314000  |
| C | 3.75514900  | -3.38277300 | 0.23609100  |
| C | 5.04582400  | -3.83413000 | 0.40441900  |
| O | 3.79936600  | -2.01446000 | 0.12088800  |
| C | 5.89524800  | -2.70689600 | 0.39014500  |
| C | 6.58462900  | 1.80983900  | 0.04009400  |
| H | 7.44938600  | 2.46095800  | 0.08447800  |
| F | 6.90219000  | 4.98858800  | -0.23499600 |
| F | 5.42428100  | -5.10597400 | 0.55470200  |
| C | 2.49446600  | -4.05104800 | 0.16934600  |
| C | 0.06802700  | -4.64064600 | 0.02237000  |
| C | 0.89377600  | -5.74867500 | 0.12280800  |
| C | 2.26151300  | -5.41617500 | 0.20655800  |
| H | 3.05946100  | -6.14394200 | 0.29126100  |
| C | -1.35582000 | -4.62504100 | -0.08906300 |
| C | -3.36782900 | -3.64768800 | -0.22663200 |
| C | -3.56321700 | -5.01018400 | -0.28719300 |
| C | -4.26552500 | -2.53680900 | -0.25330900 |
| C | -5.31791100 | -0.26853200 | -0.18308000 |
| C | -6.23291600 | -1.28823300 | -0.38632200 |
| O | -2.01802100 | -3.42119700 | -0.10618400 |
| C | -2.29637400 | -5.62555100 | -0.20056500 |
| C | -5.63968300 | -2.56729500 | -0.42531700 |
| H | -6.19143500 | -3.48785400 | -0.57292000 |
| F | -4.73725500 | -5.63575700 | -0.40352200 |
| S | 4.13742300  | 0.97630000  | -0.20108300 |
| S | 0.99556000  | -3.15362300 | 0.02996200  |
| S | -3.68820700 | -0.89586700 | -0.03828300 |
| C | -5.58340800 | 1.13289900  | -0.09103800 |
| C | -6.73512800 | 1.87690800  | -0.21360400 |
| O | -4.54982200 | 1.99821500  | 0.17527000  |
| C | -6.38835300 | 3.23198200  | -0.01455700 |
| C | -5.03462700 | 3.28188100  | 0.22443000  |
| C | -4.13541700 | 4.36259700  | 0.50294400  |
| C | -4.43745200 | 5.70830400  | 0.58255200  |
| S | -2.43334400 | 4.08300700  | 0.80830300  |
| C | -3.30519400 | 6.51148800  | 0.88762800  |
| H | -5.43782000 | 6.09426300  | 0.42763900  |
| C | -2.15712500 | 5.78058300  | 1.03751100  |
| H | -1.16240400 | 6.13403000  | 1.27304100  |
| F | -7.22470000 | 4.27313300  | -0.05031900 |
| F | 4.92914700  | 7.15708400  | -0.80107200 |
| F | 7.22429000  | -2.71791800 | 0.52126700  |
| F | -2.05398500 | -6.93852800 | -0.22435800 |
| F | -7.95739600 | 1.40533400  | -0.47311600 |
| H | 7.55017100  | -0.14649100 | 0.39496000  |
| H | 0.51348100  | -6.76299100 | 0.13514400  |
| H | -7.29499300 | -1.10764400 | -0.50029300 |
| H | -3.34461400 | 7.59019200  | 0.99222000  |
| H | 2.43974400  | 5.62344300  | -1.03380400 |

C2FOS-5

0 1

|   |             |             |             |
|---|-------------|-------------|-------------|
| C | 5.18097800  | -0.19558400 | 2.14919700  |
| C | 5.06887000  | 1.92818800  | 1.49730100  |
| C | 4.39599600  | 3.11617600  | 1.05863500  |
| C | 2.71553600  | 4.82278400  | 0.33608600  |
| C | 1.52802600  | 5.53665700  | -0.01496000 |
| C | -0.67444300 | 5.77320300  | -0.35234500 |
| C | 6.38938100  | 1.63979300  | 1.73900000  |
| C | 6.45621500  | 0.28197400  | 2.15447800  |
| C | 4.95766000  | 4.34849300  | 0.77949600  |
| C | 4.00994900  | 5.31259600  | 0.37153400  |
| C | -0.08413400 | 6.99524300  | -0.59007800 |
| C | 1.30245300  | 6.84600400  | -0.37774500 |
| O | 4.33378500  | 0.80007900  | 1.75235500  |
| O | 0.31667700  | 4.88755000  | -0.00355400 |
| H | 6.01950900  | 4.54242600  | 0.87267100  |
| C | -2.03380500 | 5.33658100  | -0.39934700 |
| C | -4.17434900 | 4.04135200  | -0.35279500 |
| C | -4.35552500 | 5.38738700  | -0.62803500 |
| C | -5.19219700 | 3.04619900  | -0.23403900 |
| C | -5.98981500 | 0.97237500  | 0.05149600  |
| C | -7.06995500 | 1.81982900  | -0.06765900 |
| O | -4.84674800 | 1.72852400  | -0.05104800 |
| C | -6.56796300 | 3.12490500  | -0.24747400 |
| C | -3.15010800 | 6.11638500  | -0.65555300 |
| H | -3.08831600 | 7.17948600  | -0.85374800 |
| F | 7.42379200  | 2.47616100  | 1.60517100  |
| F | -0.70892900 | 8.11793600  | -0.95437200 |
| F | -8.35789600 | 1.46932800  | -0.02482500 |
| C | -5.89717100 | -0.44155800 | 0.23135900  |
| C | -5.15854000 | -2.82350700 | 0.43332500  |
| C | -6.52923800 | -2.66396900 | 0.55967400  |
| C | -6.94522700 | -1.32280600 | 0.44464900  |
| H | -7.97665100 | -0.99916400 | 0.51264900  |
| C | -4.42610100 | -4.04777500 | 0.49919700  |
| C | -2.59245200 | -5.32884900 | 0.37444100  |
| C | -3.65412500 | -6.15296000 | 0.67803700  |
| C | -1.20372900 | -5.58219600 | 0.15736800  |
| C | 1.24010200  | -5.42137200 | -0.35056500 |
| C | 0.82899500  | -6.70987300 | -0.05248200 |
| O | -3.07167900 | -4.04538100 | 0.26855000  |
| C | -4.80860500 | -5.34644800 | 0.75660100  |
| C | -0.54902200 | -6.80074200 | 0.23362000  |
| H | -1.05700900 | -7.72342600 | 0.48681700  |
| F | -3.60055000 | -7.47468200 | 0.86156600  |
| S | 2.66115900  | 3.13681300  | 0.81282300  |
| S | -2.47803200 | 3.66347100  | -0.12153000 |
| S | -4.36123000 | -1.28433000 | 0.17035100  |
| S | -0.09871300 | -4.29290700 | -0.27644400 |
| C | 2.55872600  | -4.98291800 | -0.68419700 |
| C | 3.76288500  | -5.63891800 | -0.80433800 |
| O | 2.77523400  | -3.65373200 | -0.95686600 |
| C | 4.73625400  | -4.67831300 | -1.16031400 |
| C | 4.10321000  | -3.46019600 | -1.24856900 |
| C | 4.56466900  | -2.13983700 | -1.56147600 |
| C | 5.85866700  | -1.74300600 | -1.83976300 |
| S | 3.46361900  | -0.77963700 | -1.62524300 |
| C | 5.96366300  | -0.34991300 | -2.10110400 |

|   |             |             |             |
|---|-------------|-------------|-------------|
| H | 6.69468900  | -2.43212700 | -1.85151900 |
| C | 4.76067800  | 0.30051000  | -2.02242200 |
| H | 4.55382000  | 1.35195100  | -2.16887000 |
| F | 6.03426700  | -4.91341700 | -1.37094300 |
| F | 7.56984100  | -0.37461000 | 2.48040700  |
| F | 2.22615500  | 7.80234000  | -0.50247900 |
| F | -7.29474300 | 4.23486100  | -0.39892100 |
| F | -6.04673200 | -5.76561900 | 1.03036600  |
| F | 3.97446400  | -6.94447900 | -0.61843300 |
| H | 4.25729800  | 6.33533000  | 0.11390800  |
| H | -5.33192000 | 5.82311900  | -0.80133200 |
| H | -7.20157500 | -3.49642000 | 0.72786200  |
| H | 1.50793600  | -7.55403000 | -0.04415300 |
| H | 6.89750600  | 0.14821800  | -2.33735100 |
| H | 4.74225000  | -1.15199300 | 2.37905800  |

# C2FOS-6

0 1

|   |             |             |             |
|---|-------------|-------------|-------------|
| C | 4.44300900  | 0.09853200  | -2.10305800 |
| C | 4.03164900  | -2.31660400 | -1.60623400 |
| C | 3.46201300  | -3.59409400 | -1.31237900 |
| C | 1.79177800  | -5.01884400 | -0.87023100 |
| C | 0.43194300  | -5.39438200 | -0.64662800 |
| C | -2.04824300 | -5.46754300 | -0.31646300 |
| C | -3.44144300 | -5.17839600 | -0.19064300 |
| C | -5.24996100 | -3.85893000 | -0.10517700 |
| C | 3.20770900  | 3.41757000  | -2.58589100 |
| C | 4.52308000  | 3.70466500  | -2.78925800 |
| C | 5.23892400  | 2.48512300  | -2.64302100 |
| C | 4.32139800  | 1.50525200  | -2.35379900 |
| C | 2.96273100  | -5.74440600 | -0.88687300 |
| C | 4.01452600  | -4.84717400 | -1.16530000 |
| C | 5.36917300  | -2.02242300 | -1.81108400 |
| C | 5.60057100  | -0.65824000 | -2.09146600 |
| C | -0.05387500 | -6.67450300 | -0.43269800 |
| C | -1.45013000 | -6.71578500 | -0.24723400 |
| C | -5.68112400 | -5.16266200 | 0.01184100  |
| C | -4.54321200 | -5.99287000 | -0.04160600 |
| O | 2.10526800  | -3.70741500 | -1.13115000 |
| O | -3.88087300 | -3.87661400 | -0.22737500 |
| O | 3.07878700  | 2.08339100  | -2.32106000 |
| H | 6.57980000  | -0.23504100 | -2.28079800 |
| H | 0.58687700  | -7.54767200 | -0.41665300 |
| C | -5.95386200 | -2.61620000 | -0.11489300 |
| C | -6.64445800 | -0.21123400 | -0.12509300 |
| C | -7.71732300 | -1.08775700 | -0.09827400 |
| C | -6.70456400 | 1.21547000  | -0.15134900 |
| C | -5.85731200 | 3.28911200  | -0.12633600 |
| C | -7.22640900 | 3.40176800  | -0.23387400 |
| O | -5.54669300 | 1.95118700  | -0.07708800 |
| C | -7.75991800 | 2.09646800  | -0.24939900 |
| C | -7.32865600 | -2.44170200 | -0.09119000 |
| H | -8.02324800 | -3.27247100 | -0.06987100 |
| H | 2.30711500  | 4.00811800  | -2.58545500 |
| F | 6.56066500  | 2.32756200  | -2.76455500 |
| F | 3.08196100  | -7.05809700 | -0.67449300 |

|   |             |             |             |
|---|-------------|-------------|-------------|
| F | -6.94616000 | -5.56709200 | 0.15211800  |
| F | -7.92204700 | 4.53913600  | -0.30664600 |
| C | -4.81241900 | 4.25959000  | -0.05061000 |
| C | -2.63372800 | 5.46439000  | 0.19067000  |
| C | -3.70724000 | 6.31505500  | -0.01810500 |
| C | -4.93528800 | 5.63614300  | -0.15313700 |
| H | -5.88556700 | 6.12884300  | -0.31974800 |
| C | -1.26147000 | 5.82206000  | 0.35898600  |
| C | 0.90851800  | 5.40750900  | 0.73888400  |
| C | 0.77322900  | 6.76474400  | 0.54323400  |
| C | 2.03291800  | 4.57243900  | 1.02050900  |
| C | 3.56139200  | 2.66689200  | 1.55501500  |
| C | 4.22696500  | 3.87146100  | 1.39563100  |
| O | -0.33761400 | 4.83990600  | 0.62423700  |
| C | -0.59315300 | 7.02560500  | 0.30431600  |
| C | 3.36480100  | 4.94647600  | 1.09493500  |
| H | 3.69768000  | 5.96516000  | 0.93572100  |
| F | 1.75529100  | 7.66923400  | 0.57553500  |
| S | 3.03490300  | -0.88431800 | -1.76084900 |
| S | -0.86195300 | -4.21109300 | -0.61539600 |
| S | -5.11868200 | -1.07499800 | -0.14420100 |
| S | -3.14623100 | 3.78843900  | 0.21994600  |
| S | 1.83525700  | 2.85873200  | 1.32995100  |
| C | 4.13202900  | 1.39196400  | 1.85782400  |
| C | 5.43009800  | 0.96307900  | 2.01815900  |
| O | 3.30533500  | 0.31080800  | 2.04336000  |
| C | 5.38736400  | -0.41858400 | 2.30874900  |
| C | 4.06518100  | -0.79841900 | 2.31913600  |
| C | 3.41483200  | -2.05346700 | 2.55594200  |
| C | 4.01010000  | -3.26965000 | 2.83216200  |
| S | 1.67043500  | -2.20203100 | 2.52329900  |
| C | 3.06640800  | -4.31620400 | 3.01696100  |
| H | 5.08420700  | -3.39581700 | 2.89694200  |
| C | 1.76964300  | -3.89562600 | 2.88246600  |
| H | 0.86240000  | -4.47808200 | 2.96790800  |
| F | 6.44044700  | -1.20955100 | 2.53268600  |
| F | 5.06264900  | 4.89106900  | -3.07126400 |
| F | 5.30968800  | -5.15773500 | -1.26726100 |
| F | -4.53566900 | -7.32635000 | 0.03459500  |
| F | -9.05234600 | 1.77363200  | -0.34444300 |
| F | -1.13768400 | 8.22120800  | 0.06540900  |
| F | 6.52932900  | 1.71479500  | 1.91532600  |
| H | 6.14927900  | -2.77222800 | -1.75916000 |
| H | -2.01259500 | -7.62461700 | -0.07157800 |
| H | -8.74668700 | -0.75099600 | -0.08419700 |
| H | -3.60017600 | 7.39188300  | -0.06945800 |
| H | 5.30169600  | 3.96362200  | 1.49527300  |
| H | 3.34158200  | -5.34080700 | 3.24192200  |

T2FOS-1

|     |             |             |             |
|-----|-------------|-------------|-------------|
| 0 1 |             |             |             |
| C   | -3.41336200 | -0.37104700 | -0.00001300 |
| C   | -3.26509200 | 0.98896100  | 0.00000700  |
| C   | -1.90177600 | 1.39839100  | 0.00001800  |
| C   | -1.02187000 | 0.33784200  | -0.00000200 |
| C   | 0.41634200  | 0.38493400  | 0.00001800  |

|   |             |             |             |
|---|-------------|-------------|-------------|
| C | 1.39505700  | -0.57463300 | -0.00000600 |
| O | 1.02609700  | 1.61431700  | 0.00007500  |
| C | 2.65004600  | 0.09671800  | 0.00003600  |
| C | 2.38113300  | 1.43044300  | 0.00008100  |
| H | 2.99752900  | 2.31404100  | 0.00012100  |
| S | -1.88327800 | -1.18839900 | -0.00008500 |
| F | 1.20782000  | -1.89859700 | -0.00005800 |
| H | -1.57182500 | 2.43054100  | 0.00005100  |
| F | 3.84599100  | -0.49326800 | 0.00002900  |
| H | -4.10073000 | 1.68022800  | 0.00003100  |
| H | -4.32848300 | -0.94783900 | -0.00001400 |

#### T2FOS-2

0 1

|   |             |             |             |
|---|-------------|-------------|-------------|
| C | 6.90727700  | -1.10413500 | -0.00011000 |
| C | 6.09218900  | -2.20350900 | -0.00004100 |
| C | 4.70986500  | -1.86916700 | -0.00001200 |
| C | 4.48486400  | -0.50785700 | -0.00005700 |
| C | 3.22244000  | 0.17331400  | -0.00005100 |
| C | 2.85923700  | 1.49823000  | -0.00008900 |
| O | 2.07436500  | -0.58213200 | 0.00000200  |
| C | 1.44613500  | 1.55138800  | -0.00005700 |
| C | 0.98474400  | 0.25668000  | 0.00000000  |
| C | -0.32208500 | -0.32790900 | 0.00005300  |
| C | -0.64713400 | -1.67067700 | 0.00011400  |
| C | -2.04096400 | -1.90778400 | 0.00013500  |
| C | -2.79144400 | -0.74927800 | 0.00009100  |
| C | -4.22193400 | -0.62999400 | 0.00008000  |
| C | -5.08399600 | 0.43735300  | 0.00004300  |
| O | -4.96968700 | -1.78117700 | 0.00010900  |
| C | -6.40727500 | -0.08467100 | 0.00005300  |
| C | -6.29381100 | -1.44107000 | 0.00009700  |
| H | -7.00858300 | -2.24719500 | 0.00011900  |
| S | -1.76411200 | 0.67180600  | 0.00006200  |
| S | 6.00032900  | 0.37503500  | -0.00012000 |
| F | -4.74361800 | 1.72950100  | 0.00000400  |
| F | 3.68975500  | 2.54404900  | -0.00014600 |
| H | -2.49019500 | -2.89381800 | 0.00017000  |
| H | 3.90468800  | -2.59424800 | 0.00003600  |
| F | -7.52702100 | 0.63842100  | 0.00002600  |
| F | 0.69571800  | 2.65578700  | -0.00007800 |
| H | 0.10279600  | -2.45260600 | 0.00013100  |
| H | 6.46395600  | -3.22224700 | -0.00001600 |
| H | 7.98828100  | -1.06818400 | -0.00014800 |

#### T2FOS-3

0 1

|   |            |             |             |
|---|------------|-------------|-------------|
| C | 6.85777700 | -0.26351400 | -0.00007300 |
| C | 6.83074300 | 1.11041000  | -0.00013300 |
| C | 5.47446200 | 1.50850400  | -0.00012900 |
| C | 4.70897200 | 0.36639500  | -0.00006800 |
| O | 5.55948000 | -0.71433300 | -0.00003400 |
| C | 3.29911800 | 0.12372100  | -0.00003600 |
| C | 2.64972400 | -1.09686900 | 0.00002200  |
| C | 1.24229000 | -0.98104600 | 0.00003700  |

|   |              |             |             |
|---|--------------|-------------|-------------|
| C | 0.80122800   | 0.32934900  | -0.00000900 |
| C | -0.54920100  | 0.79977800  | -0.00001000 |
| C | -1.11616700  | 2.05337300  | -0.00004800 |
| O | -1.56569700  | -0.12630000 | 0.00003400  |
| C | -2.51844800  | 1.88482200  | -0.00002600 |
| C | -2.77227500  | 0.53286800  | 0.00002500  |
| C | 7.91536100   | -1.23227400 | -0.00004800 |
| C | 7.80233000   | -2.60757800 | 0.00001400  |
| C | 9.06176800   | -3.26799000 | 0.00001800  |
| C | 10.11973600  | -2.39973900 | -0.00004500 |
| C | -3.97390700  | -0.24353200 | 0.00006500  |
| C | -4.09390400  | -1.62033800 | 0.00011400  |
| C | -5.43610900  | -2.06370000 | 0.00014000  |
| C | -6.35203700  | -1.03064000 | 0.00011100  |
| C | -7.78412400  | -1.12535800 | 0.00012300  |
| C | -8.79373900  | -0.19615700 | 0.00010000  |
| O | -8.35444800  | -2.37395400 | 0.00016400  |
| C | -10.02586800 | -0.90675900 | 0.00013000  |
| C | -9.71417500  | -2.23183300 | 0.00017000  |
| H | -10.30288200 | -3.13415500 | 0.00020200  |
| S | -5.55004400  | 0.52855600  | 0.00005700  |
| S | 2.15123200   | 1.45121700  | -0.00007200 |
| S | 9.60008800   | -0.74453400 | -0.00009100 |
| F | -8.64611800  | 1.13182800  | 0.00005800  |
| F | -0.45782100  | 3.21468400  | -0.00009600 |
| F | 7.89201800   | 1.92081900  | -0.00018400 |
| H | -5.73242300  | -3.10592700 | 0.00017700  |
| H | 0.56310700   | -1.82521700 | 0.00007900  |
| H | 6.84511600   | -3.11535500 | 0.00005300  |
| F | -11.23957500 | -0.35612900 | 0.00012100  |
| F | -3.43346500  | 2.85682900  | -0.00004900 |
| F | 5.01742300   | 2.76288000  | -0.00017700 |
| H | -3.23530000  | -2.28113900 | 0.00012800  |
| H | 3.18206200   | -2.04049300 | 0.00005200  |
| H | 9.17470100   | -4.34653200 | 0.00006000  |
| H | 11.17703700  | -2.62784400 | -0.00006000 |

T2FOS-4

0 1

|   |             |             |             |
|---|-------------|-------------|-------------|
| C | -3.20562600 | -1.46342400 | -0.00005500 |
| C | -2.92617400 | -2.81081800 | -0.00010300 |
| C | -1.52131800 | -2.95283800 | -0.00009900 |
| C | -0.97777200 | -1.68859100 | -0.00004900 |
| O | -2.01158900 | -0.78171700 | -0.00002200 |
| C | 0.36289700  | -1.19223200 | -0.00002200 |
| C | 0.77703600  | 0.12737700  | 0.00003300  |
| C | 2.18122900  | 0.27204400  | 0.00004400  |
| C | 2.85589600  | -0.93523600 | -0.00000100 |
| C | 4.26997900  | -1.14679500 | -0.00000500 |
| C | 5.06095100  | -2.27254800 | -0.00004700 |
| O | 5.09604200  | -0.04740000 | 0.00004100  |
| C | 6.40719700  | -1.84548000 | -0.00002700 |
| C | 6.40443400  | -0.46978800 | 0.00002800  |
| C | -4.42067400 | -0.70982500 | -0.00003600 |
| C | -4.56450800 | 0.66546400  | 0.00001300  |
| C | -5.91233000 | 1.08634700  | 0.00001700  |



|   |              |             |             |
|---|--------------|-------------|-------------|
| C | -6.81294300  | 0.03723500  | -0.00003100 |
| C | 7.43851000   | 0.51890800  | 0.00006900  |
| C | 7.29462400   | 1.89346400  | 0.00012200  |
| C | 8.52790900   | 2.58383400  | 0.00014800  |
| C | 9.62349700   | 1.74353800  | 0.00011400  |
| C | 11.01110500  | 2.10998000  | 0.00012400  |
| C | 12.18041100  | 1.39202700  | 0.00009900  |
| O | 11.33106700  | 3.44484800  | 0.00016700  |
| C | 13.25309700  | 2.32615000  | 0.00012800  |
| C | 12.69263300  | 3.56666400  | 0.00017000  |
| H | 13.09697800  | 4.56529300  | 0.00020300  |
| C | -8.24159000  | 0.10958900  | -0.00004300 |
| C | -9.23942300  | -0.83640100 | -0.00008700 |
| O | -8.83353500  | 1.35083900  | -0.00000700 |
| C | -10.47507200 | -0.14969400 | -0.00007600 |
| C | -10.19900700 | 1.19651700  | -0.00002600 |
| C | -11.01700300 | 2.37451200  | 0.00000800  |
| C | -10.60302100 | 3.69089500  | 0.00006400  |
| C | -11.68547200 | 4.61310500  | 0.00007700  |
| C | -12.90905500 | 3.99988800  | 0.00002600  |
| S | 9.13248100   | 0.06046100  | 0.00005600  |
| S | 1.73542100   | -2.28625900 | -0.00005700 |
| S | -5.98360600  | -1.50922200 | -0.00007600 |
| S | -12.76796600 | 2.27084500  | -0.00000800 |
| F | 12.29092400  | 0.06057200  | 0.00005500  |
| F | 4.63066300   | -3.53598000 | -0.00009900 |
| F | -3.82282300  | -3.79964100 | -0.00014600 |
| F | -11.68913200 | -0.70568100 | -0.00010800 |
| H | 8.62068800   | 3.66337500  | 0.00018700  |
| H | 2.69390900   | 1.22649000  | 0.00008400  |
| H | -3.71693400  | 1.34037400  | 0.00004500  |
| H | -9.55731500  | 3.97483700  | 0.00009000  |
| F | 14.54992300  | 2.01905900  | 0.00011600  |
| F | 7.48675800   | -2.63040800 | -0.00005500 |
| F | -0.84117500  | -4.10130600 | -0.00013700 |
| F | -9.06855300  | -2.16050200 | -0.00013200 |
| H | 6.32605900   | 2.37894400  | 0.00014000  |
| H | 0.08054300   | 0.95728000  | 0.00006200  |
| H | -6.22557700  | 2.12348800  | 0.00005100  |
| H | -11.55746100 | 5.68995500  | 0.00011400  |
| H | -13.88982400 | 4.45595900  | 0.00001700  |

T2FOS-5

0 1

|   |            |             |             |
|---|------------|-------------|-------------|
| C | 0.54201400 | -2.76444100 | -0.00005400 |
| C | 1.08149000 | -4.03059600 | -0.00010200 |
| C | 2.48665000 | -3.89306200 | -0.00009800 |
| C | 2.77048500 | -2.54649400 | -0.00004700 |
| O | 1.57861300 | -1.86087000 | -0.00002100 |
| C | 3.98800400 | -1.79729700 | -0.00002100 |
| C | 4.13666300 | -0.42221000 | 0.00003100  |
| C | 5.48562600 | -0.00620900 | 0.00004100  |
| C | 6.38278700 | -1.05874100 | -0.00000200 |
| C | 7.81096900 | -0.99151800 | -0.00000700 |
| C | 8.80494900 | -1.94289000 | -0.00004700 |
| O | 8.40824900 | 0.24706600  | 0.00003400  |

|   |              |             |             |
|---|--------------|-------------|-------------|
| C | 10.04298600  | -1.26309800 | -0.00003000 |
| C | 9.77355800   | 0.08599600  | 0.00002100  |
| C | -0.79707900  | -2.26412700 | -0.00003600 |
| C | -1.20722900  | -0.94319200 | 0.00001600  |
| C | -2.61082100  | -0.79421000 | 0.00001700  |
| C | -3.28924500  | -1.99959400 | -0.00003400 |
| C | 10.59683400  | 1.25596200  | 0.00005800  |
| C | 10.19052400  | 2.57694000  | 0.00011000  |
| C | 11.26756300  | 3.49217200  | 0.00013200  |
| C | 12.50466000  | 2.87896300  | 0.00009700  |
| C | 13.79560000  | 3.50612500  | 0.00010100  |
| C | 15.08128800  | 3.02676000  | 0.00007300  |
| O | 13.85256300  | 4.87766600  | 0.00014200  |
| C | 15.95402700  | 4.14987400  | 0.00009700  |
| C | 15.16521200  | 5.25927700  | 0.00014100  |
| H | 15.36976200  | 6.31708000  | 0.00017100  |
| C | -4.70375200  | -2.20659000 | -0.00005200 |
| C | -5.49838200  | -3.33001800 | -0.00010100 |
| O | -5.52638700  | -1.10454900 | -0.00001500 |
| C | -6.84303300  | -2.89902300 | -0.00009400 |
| C | -6.83618200  | -1.52291000 | -0.00004000 |
| C | -7.86686600  | -0.53186700 | -0.00001000 |
| C | -7.71845500  | 0.84295100  | 0.00004600  |
| C | -8.94765900  | 1.53768500  | 0.00005900  |
| C | -10.04865100 | 0.70116500  | 0.00001300  |
| C | -11.43009800 | 1.07245700  | 0.00000700  |
| C | -12.60489200 | 0.35805600  | -0.00003400 |
| O | -11.74717100 | 2.41063300  | 0.00004800  |
| C | -13.66807200 | 1.28973300  | -0.00001400 |
| C | -13.11448500 | 2.54754800  | 0.00003700  |
| C | -13.66609300 | 3.87140800  | 0.00007900  |
| C | -12.98368400 | 5.07078400  | 0.00014100  |
| C | -13.84714600 | 6.20062300  | 0.00014900  |
| C | -15.17256700 | 5.85929800  | 0.00008400  |
| S | 12.34753800  | 1.13285000  | 0.00004600  |
| S | 5.54779600   | -2.60241000 | -0.00005400 |
| S | -2.17293200  | -3.35402200 | -0.00007900 |
| S | -9.56269500  | -0.98493800 | -0.00003800 |
| S | -15.39942100 | 4.13935100  | 0.00008500  |
| F | 15.44625300  | 1.74160600  | 0.00002900  |
| F | 8.62674700   | -3.26570900 | -0.00009500 |
| F | 0.39767000   | -5.17677300 | -0.00014500 |
| F | -7.92513100  | -3.68036200 | -0.00013200 |
| F | -14.97202000 | 1.00203300  | -0.00004100 |
| H | 11.15062000  | 4.56935700  | 0.00016900  |
| H | 5.80240400   | 1.02986900  | 0.00007900  |
| H | -0.50820900  | -0.11540800 | 0.00005000  |
| H | -6.74794900  | 1.32458200  | 0.00007300  |
| H | -11.90161300 | 5.12716500  | 0.00016700  |
| F | 17.28568800  | 4.09797900  | 0.00008100  |
| F | 11.25462900  | -1.82304800 | -0.00005700 |
| F | 3.38022800   | -4.88447400 | -0.00013600 |
| F | -5.07166400  | -4.59458000 | -0.00014800 |
| F | -12.71720500 | -0.97218800 | -0.00008200 |
| H | 9.14658600   | 2.86690100  | 0.00012900  |
| H | 3.29142500   | 0.25559100  | 0.00005900  |
| H | -3.12062200  | 0.16176200  | 0.00005200  |

|   |              |            |            |
|---|--------------|------------|------------|
| H | -9.03581200  | 2.61750800 | 0.00009700 |
| H | -13.49481900 | 7.22623100 | 0.00018300 |
| H | -16.03502900 | 6.51201000 | 0.00006200 |

T2FOS-6

0 1

|   |              |             |             |
|---|--------------|-------------|-------------|
| C | 4.26658900   | -3.52059800 | -0.00009400 |
| C | 5.04272800   | -4.65704300 | -0.00014300 |
| C | 6.39408200   | -4.24816900 | -0.00014200 |
| C | 6.40984100   | -2.87203100 | -0.00009200 |
| O | 5.10699700   | -2.43219300 | -0.00006300 |
| C | 7.45680700   | -1.89852700 | -0.00006800 |
| C | 7.33162400   | -0.52110300 | -0.00001300 |
| C | 8.57212600   | 0.15250100  | -0.00000300 |
| C | 9.65912300   | -0.70270500 | -0.00004900 |
| C | 11.04591200  | -0.35474900 | -0.00005300 |
| C | 12.20875900  | -1.09014500 | -0.00009300 |
| O | 11.38591000  | 0.97767000  | -0.00000800 |
| C | 13.28749800  | -0.17844500 | -0.00007200 |
| C | 12.75603000  | 1.09049700  | -0.00002000 |
| C | 2.85554600   | -3.29148600 | -0.00007300 |
| C | 2.19541100   | -2.07596300 | -0.00003000 |
| C | 0.78974700   | -2.20368900 | -0.00002100 |
| C | 0.35973800   | -3.51836000 | -0.00005800 |
| C | 13.33082700  | 2.40058200  | 0.00002200  |
| C | 12.66959400  | 3.61416100  | 0.00007500  |
| C | 13.54269500  | 4.72558200  | 0.00010800  |
| C | 14.87710600  | 4.37092100  | 0.00008000  |
| C | 16.01762300  | 5.24205500  | 0.00009900  |
| C | 17.37279800  | 5.02705800  | 0.00008000  |
| O | 15.80134100  | 6.59756500  | 0.00014700  |
| C | 18.00552400  | 6.30093600  | 0.00011800  |
| C | 17.01231000  | 7.23185100  | 0.00015900  |
| H | 17.00311000  | 8.30919400  | 0.00019600  |
| C | -0.98645700  | -3.99906500 | -0.00006200 |
| C | -1.54370000  | -5.25751800 | -0.00008800 |
| O | -2.01016900  | -3.08091100 | -0.00003600 |
| C | -2.94670400  | -5.10027000 | -0.00007700 |
| C | -3.21150700  | -3.74973400 | -0.00004500 |
| C | -4.41860300  | -2.98399300 | -0.00002300 |
| C | -4.54897400  | -1.60698900 | 0.00000400  |
| C | -5.89219200  | -1.17309300 | 0.00001800  |
| C | -6.80340300  | -2.21368900 | 0.00000100  |
| C | -8.23034600  | -2.12757000 | 0.00000700  |
| C | -9.23670200  | -3.06612600 | -0.00000400 |
| O | -8.81155700  | -0.88129900 | 0.00002600  |
| C | -10.46564200 | -2.37074500 | 0.00001000  |
| C | -10.17897500 | -1.02476500 | 0.00002800  |
| C | -10.98712200 | 0.15471400  | 0.00004600  |
| C | -10.56397300 | 1.47117800  | 0.00006200  |
| C | -11.62752600 | 2.39995600  | 0.00007600  |
| C | -12.87485900 | 1.80320600  | 0.00007000  |
| S | 15.07089500  | 2.62840800  | 0.00001300  |
| S | 9.14445600   | -2.38050900 | -0.00010700 |
| S | 1.71887800   | -4.62890000 | -0.00010400 |
| S | -5.98896300  | -3.76832200 | -0.00003100 |

|   |              |             |             |
|---|--------------|-------------|-------------|
| S | -12.73964400 | 0.05374100  | 0.00005100  |
| C | -14.15312400 | 2.44539300  | 0.00007900  |
| C | -15.44759000 | 1.98183800  | 0.00007700  |
| O | -14.19478600 | 3.82002000  | 0.00009100  |
| C | -16.30168400 | 3.10812300  | 0.00008900  |
| C | -15.50665000 | 4.22907000  | 0.00009800  |
| C | -15.78105800 | 5.63680100  | 0.00011100  |
| C | -14.87220500 | 6.67521700  | 0.00012000  |
| S | -17.42555900 | 6.24666400  | 0.00012100  |
| C | -15.49193700 | 7.95512400  | 0.00012800  |
| C | -16.85879300 | 7.88639600  | 0.00012400  |
| H | -17.57298100 | 8.69868100  | 0.00012600  |
| F | 17.98472500  | 3.83938100  | 0.00003400  |
| F | 12.29665100  | -2.42188700 | -0.00014300 |
| F | 4.59529700   | -5.91435000 | -0.00018400 |
| F | -3.85423200  | -6.07887700 | -0.00009400 |
| F | -11.68441800 | -2.91487200 | 0.00000600  |
| F | -17.63671400 | 3.08774300  | 0.00009100  |
| H | 13.21335300  | 5.75784700  | 0.00015000  |
| H | 8.67838200   | 1.23070000  | 0.00003800  |
| H | 2.71961000   | -1.12779900 | -0.00000500 |
| H | -3.69477900  | -0.94049600 | 0.00001300  |
| H | -9.51623900  | 1.74718200  | 0.00006300  |
| H | -13.80067600 | 6.51431900  | 0.00011800  |
| F | 19.32098300  | 6.51440500  | 0.00011400  |
| F | 14.58602200  | -0.48726000 | -0.00009900 |
| F | 7.46319400   | -5.04696100 | -0.00018200 |
| F | -0.87577200  | -6.41297600 | -0.00011800 |
| F | -9.07517000  | -4.39102200 | -0.00002300 |
| F | -15.82542800 | 0.70151600  | 0.00006500  |
| H | 11.58881300  | 3.68986000  | 0.00008900  |
| H | 6.36946300   | -0.02303300 | 0.00001800  |
| H | 0.10327600   | -1.36547700 | 0.00001000  |
| H | -6.19521300  | -0.13291300 | 0.00003900  |
| H | -11.49586700 | 3.47534800  | 0.00008800  |
| H | -14.94126500 | 8.88937600  | 0.00013400  |
