# Supplementary material for: Folding oligomers of difluorinated thienylfurans: a DFT study
Source: Royal Society of Chemistry journal article supplement (doi:10.1039/b916415d), 2009-11-18
Supplement: b916415d.zip [file b916415d.zip]

Cartesian coordinates of MPWB1K/6-31G(d) optimized geometries  
all-cisoid CFSFO-n, and all-transoid TFSFO-n, n = 1-6.  
Charge and multiplicity are given first.

CFSFO-1

|     |             |             |             |
|-----|-------------|-------------|-------------|
| 0 1 |             |             |             |
| C   | -2.53888900 | -1.19792200 | 0.00007600  |
| C   | -0.65312800 | -0.10561900 | 0.00004500  |
| C   | -1.62295000 | 0.84427000  | 0.00013700  |
| C   | -2.83229700 | 0.11662100  | 0.00012800  |
| O   | -1.19671800 | -1.33539000 | 0.00001500  |
| C   | 0.77760600  | -0.03270000 | -0.00002800 |
| C   | 3.20000800  | -0.48095400 | 0.00035900  |
| C   | 2.93873200  | 0.84888300  | -0.00001200 |
| C   | 1.55227700  | 1.08552800  | -0.00015300 |
| S   | 1.77919200  | -1.42841800 | -0.00022300 |
| H   | -3.12737400 | -2.09220800 | 0.00005700  |
| H   | 4.16157600  | -0.96100900 | 0.00066700  |
| F   | 1.03620200  | 2.30801200  | -0.00026600 |
| F   | -4.04102600 | 0.64584500  | 0.00017900  |
| H   | 3.67945900  | 1.62942600  | 0.00001000  |
| H   | -1.49173800 | 1.90823300  | 0.00018200  |

CFSFO-2

|     |             |             |             |
|-----|-------------|-------------|-------------|
| 0 1 |             |             |             |
| C   | -2.79893400 | 0.34400200  | 0.00002400  |
| C   | -0.46682000 | 1.15858400  | 0.00002700  |
| C   | 0.95376400  | 1.25973800  | 0.00001100  |
| C   | 2.99740300  | 0.47972700  | -0.00001100 |
| C   | 3.95264800  | -0.58217900 | -0.00002700 |
| C   | 5.14398700  | -2.73626800 | 0.00003400  |
| C   | -5.08324700 | -2.32275000 | -0.00006400 |
| C   | -5.99703100 | -1.33295300 | 0.00001400  |
| C   | -5.31772400 | -0.09632800 | 0.00006200  |
| C   | -4.00063200 | -0.43040600 | 0.00000900  |
| C   | 3.12596200  | 1.83493400  | -0.00001300 |
| C   | 1.80766900  | 2.31601900  | 0.00000000  |
| C   | -1.36682500 | 2.18725100  | 0.00004900  |
| C   | -2.67896100 | 1.70072500  | 0.00004400  |
| C   | 5.30986300  | -0.47031000 | -0.00001500 |
| C   | 6.00673700  | -1.69048200 | 0.00000600  |
| O   | 1.69676100  | 0.13042300  | 0.00000600  |
| O   | -3.85387800 | -1.76807600 | -0.00006700 |
| H   | -5.14348500 | -3.39156000 | -0.00012100 |
| S   | -1.23804400 | -0.38042800 | 0.00002900  |
| S   | 3.50949500  | -2.24255300 | -0.00012400 |
| F   | 5.92335000  | 0.70566900  | 0.00000700  |
| F   | -3.73460400 | 2.50294600  | 0.00005300  |
| H   | 7.07994900  | -1.76797400 | 0.00004200  |
| H   | -1.10096700 | 3.22973100  | 0.00005800  |
| F   | 1.43830900  | 3.58299800  | 0.00000000  |
| F   | -7.30805300 | -1.48283500 | 0.00004200  |
| H   | 4.03759300  | 2.39935000  | -0.00002600 |
| H   | -5.74091300 | 0.88862900  | 0.00012900  |
| H   | 5.38336000  | -3.78407500 | 0.00008200  |

CFSFO-3

0 1

|   |             |             |             |
|---|-------------|-------------|-------------|
| C | -5.06594000 | 0.68042300  | -0.00009900 |
| C | -3.73706800 | -1.40367200 | -0.00042400 |
| C | -2.68876700 | -2.36717600 | -0.00038000 |
| C | -0.60470600 | -3.03591000 | -0.00005800 |
| C | 0.80180900  | -2.80918800 | 0.00022600  |
| C | 3.09126900  | -1.88205500 | 0.00041700  |
| C | 4.22744600  | -1.02491900 | 0.00040200  |
| C | 5.25933800  | 0.90348400  | 0.00001700  |
| C | -5.25058600 | 4.18873100  | 0.00151800  |
| C | -6.57792500 | 3.95856500  | 0.00078200  |
| C | -6.78999700 | 2.56354300  | -0.00001700 |
| C | -5.54061900 | 2.02864300  | 0.00031200  |
| C | -1.35291900 | -4.17500900 | -0.00041500 |
| C | -2.68138200 | -3.72622400 | -0.00059800 |
| C | -5.08155500 | -1.65352500 | -0.00097800 |
| C | -5.81050600 | -0.46032000 | -0.00078200 |
| C | 1.78971300  | -3.74998100 | 0.00052600  |
| C | 3.09415200  | -3.25023900 | 0.00065000  |
| C | 6.24502800  | -0.03578300 | 0.00054900  |
| C | 5.56509000  | -1.26269000 | 0.00079200  |
| O | -1.40226300 | -1.94999700 | -0.00004300 |
| O | 4.04816600  | 0.31534100  | -0.00006700 |
| O | -4.61114000 | 3.00085600  | 0.00123600  |
| C | 5.28916600  | 2.33124800  | -0.00042700 |
| C | 4.79074300  | 4.74125100  | -0.00114300 |
| C | 6.12692500  | 4.50956200  | -0.00100700 |
| C | 6.39239100  | 3.13017800  | -0.00056300 |
| H | -4.64857700 | 5.07395400  | 0.00223400  |
| S | -3.39169300 | 0.28371500  | 0.00029700  |
| S | 1.49609600  | -1.23411500 | 0.00009000  |
| S | 3.87194100  | 3.30244000  | -0.00075500 |
| F | 7.62369000  | 2.63781600  | -0.00031700 |
| F | 1.52428400  | -5.04859600 | 0.00065400  |
| F | -7.13643200 | -0.43711900 | -0.00120400 |
| H | 6.89095700  | 5.26716100  | -0.00120800 |
| H | 3.97979700  | -3.86071700 | 0.00087100  |
| H | -5.52260100 | -2.63432300 | -0.00147200 |
| F | 6.11777800  | -2.46033900 | 0.00129400  |
| F | -3.75994700 | -4.48685600 | -0.00092700 |
| F | -7.52717000 | 4.87523600  | 0.00079000  |
| H | 7.30342200  | 0.13556300  | 0.00073400  |
| H | -0.99617000 | -5.18622700 | -0.00051000 |
| H | -7.72302100 | 2.03511200  | -0.00071900 |
| H | 4.29014200  | 5.69231000  | -0.00147800 |

CFSFO-4

0 1

|   |             |             |             |
|---|-------------|-------------|-------------|
| C | -4.42176600 | 2.64667200  | 0.21671300  |
| C | -4.98823600 | 0.26274700  | -0.09807000 |
| C | -4.93300000 | -1.15624100 | -0.19803900 |
| C | -3.91254200 | -3.09376200 | -0.20888900 |
| C | -2.73561800 | -3.89347500 | -0.14289500 |
| C | -0.41837800 | -4.73621300 | -0.00837300 |
| C | 1.00021200  | -4.80548600 | 0.08255000  |
| C | 2.99610800  | -3.90787400 | 0.18229900  |
| C | -2.06416700 | 5.13273900  | 0.98836600  |

|   |             |             |             |
|---|-------------|-------------|-------------|
| C | -3.10379400 | 5.96241400  | 0.76941700  |
| C | -4.23098600 | 5.18719200  | 0.42304000  |
| C | -3.78537800 | 3.90352000  | 0.45711400  |
| C | -5.23541100 | -3.37806800 | -0.36776400 |
| C | -5.87113900 | -2.12640400 | -0.35852000 |
| C | -6.08208000 | 1.06993100  | -0.23988300 |
| C | -5.73587200 | 2.41351500  | -0.05768700 |
| C | -2.63166400 | -5.25295500 | -0.16181600 |
| C | -1.32796300 | -5.75532400 | -0.08543700 |
| C | 3.19791400  | -5.25417600 | 0.24960900  |
| C | 1.91035900  | -5.81085000 | 0.18389000  |
| O | -3.72888200 | -1.76359000 | -0.10671700 |
| O | 1.68265600  | -3.63744100 | 0.08317300  |
| O | -2.48385000 | 3.86518800  | 0.79486900  |
| C | 3.87170600  | -2.78497900 | 0.18688600  |
| C | 4.89088600  | -0.53757000 | 0.11480000  |
| C | 5.83050200  | -1.52010500 | 0.27031100  |
| C | 5.11051900  | 0.86614900  | 0.02829200  |
| C | 4.49878400  | 2.95179900  | -0.22872600 |
| C | 5.84932800  | 2.98671800  | -0.05733700 |
| O | 4.05239500  | 1.68293700  | -0.17660300 |
| C | 6.22228100  | 1.64356200  | 0.10510800  |
| C | 5.23028500  | -2.78153200 | 0.30747000  |
| H | -1.04585900 | 5.27532200  | 1.28778800  |
| C | 3.52062200  | 3.96841300  | -0.45377100 |
| C | 1.48059800  | 5.27993600  | -0.87721200 |
| C | 2.57472100  | 6.07609400  | -0.78765900 |
| C | 3.72871600  | 5.31194000  | -0.54686000 |
| S | -3.56054400 | 1.15802000  | 0.25592900  |
| S | -1.17157200 | -3.18807000 | -0.02770300 |
| S | 3.29419600  | -1.17210100 | 0.02005100  |
| S | 1.84942300  | 3.62609900  | -0.66867000 |
| F | 4.93218400  | 5.85353400  | -0.42165900 |
| F | 5.92428900  | -3.90187200 | 0.44652400  |
| F | -3.69593600 | -6.03768800 | -0.24952000 |
| F | -6.62249000 | 3.39548000  | -0.14587200 |
| H | 2.57540700  | 7.14735800  | -0.88869100 |
| H | 6.88909600  | -1.35038900 | 0.35004900  |
| H | -1.08300600 | -6.80255200 | -0.08995500 |
| H | -7.07576400 | 0.72301200  | -0.46154400 |
| F | 7.44631600  | 1.19271200  | 0.30005100  |
| F | 1.61680500  | -7.09581000 | 0.21490400  |
| F | -7.16632100 | -1.90816200 | -0.48166700 |
| F | -3.08134900 | 7.27853100  | 0.86172100  |
| H | 6.48339500  | 3.85096000  | -0.05145700 |
| H | 4.13840500  | -5.76283900 | 0.33258200  |
| H | -5.68316700 | -4.34619500 | -0.47663500 |
| H | -5.22006700 | 5.52672800  | 0.18638600  |
| H | 0.46421700  | 5.57817300  | -1.06191400 |

CFSFO-5

0 1

|   |             |             |             |
|---|-------------|-------------|-------------|
| C | 3.58581800  | -2.68255600 | -1.21714600 |
| C | 1.90829400  | -4.40474200 | -0.64950100 |
| C | 0.69837100  | -5.10042600 | -0.37026400 |
| C | -1.45915300 | -5.25743700 | -0.03267800 |
| C | -2.76203000 | -4.69439300 | 0.08239400  |

|   |             |             |             |
|---|-------------|-------------|-------------|
| C | -4.73637300 | -3.21637000 | 0.21365600  |
| C | -5.60239200 | -2.08808000 | 0.22015100  |
| C | -6.05742300 | 0.05199300  | 0.11640400  |
| C | 4.40444500  | 0.66897200  | -1.86999100 |
| C | 5.66384700  | 0.18941400  | -1.90291400 |
| C | 5.61780800  | -1.20224600 | -1.67469200 |
| C | 4.29632600  | -1.47704400 | -1.50653900 |
| C | -0.97776600 | -6.52684600 | 0.08912600  |
| C | 0.40308000  | -6.40487900 | -0.12954000 |
| C | 3.17773000  | -4.91366600 | -0.66303200 |
| C | 4.10836900  | -3.91854000 | -0.98190800 |
| C | -3.94049100 | -5.34831600 | 0.29378300  |
| C | -5.07300400 | -4.53329600 | 0.37080100  |
| C | -7.26288900 | -0.57290900 | 0.23941700  |
| C | -6.95111200 | -1.93852600 | 0.30445600  |
| O | -0.45702700 | -4.40104300 | -0.30851800 |
| O | -5.06101400 | -0.85396200 | 0.10485500  |
| O | 3.56328000  | -0.35475800 | -1.62393000 |
| C | -5.67065200 | 1.41879200  | 0.00593800  |
| C | -4.45156700 | 3.55991400  | -0.16315600 |
| C | -5.80763300 | 3.73946000  | -0.20150600 |
| C | -3.44693600 | 4.56335400  | -0.24591900 |
| C | -1.39226100 | 5.31647300  | -0.22178300 |
| C | -2.17661400 | 6.40423700  | -0.46862500 |
| O | -2.15013400 | 4.21153400  | -0.08874700 |
| C | -3.48542300 | 5.90212500  | -0.47990600 |
| C | -6.47521600 | 2.51574800  | -0.10275900 |
| H | 3.97721900  | 1.64601400  | -1.97529100 |
| C | 0.01558200  | 5.15397000  | -0.07767300 |
| C | 2.31652300  | 4.34970400  | 0.32135500  |
| C | 2.29197400  | 5.66954100  | -0.03949000 |
| C | 0.98132700  | 6.10075500  | -0.25765700 |
| C | 3.46429700  | 3.56254800  | 0.61857500  |
| C | 4.51746700  | 1.75644700  | 1.26253600  |
| C | 5.49275600  | 2.66695100  | 0.98874800  |
| C | 4.56044000  | 0.39224300  | 1.68137000  |
| C | 4.07915000  | -1.92171100 | 2.36108400  |
| C | 5.40332600  | -1.73606600 | 2.13319300  |
| O | 3.30069600  | 2.28864100  | 1.04342900  |
| C | 4.79967900  | 3.81458100  | 0.57710400  |
| C | 5.65868000  | -0.41025900 | 1.74497400  |
| S | 1.87651400  | -2.72720200 | -1.03623800 |
| S | -3.04585600 | -2.99991300 | -0.02763700 |
| S | -4.01779300 | 1.90150500  | -0.01133500 |
| S | 0.73975900  | 3.66054500  | 0.38177100  |
| S | 3.15899900  | -0.50907300 | 2.09874800  |
| F | 6.86885400  | 0.02310000  | 1.42277900  |
| F | 0.68838900  | 7.34327300  | -0.61307000 |
| F | -7.79697600 | 2.42170500  | -0.11209400 |
| F | -3.99923400 | -6.66649400 | 0.41852100  |
| F | 5.41340600  | -4.15360600 | -1.03601800 |
| H | 6.16307500  | -2.49264300 | 2.22319200  |
| H | 3.16402300  | 6.29132300  | -0.13878100 |
| H | -6.29407800 | 4.69418700  | -0.29390700 |
| H | -6.07245300 | -4.89596500 | 0.53211700  |
| H | 3.42780200  | -5.93878000 | -0.45339900 |
| F | 5.33659800  | 4.96136500  | 0.20828100  |

|   |             |             |             |
|---|-------------|-------------|-------------|
| F | -4.58727600 | 6.59808700  | -0.68325300 |
| F | -7.81259600 | -2.92968500 | 0.42635000  |
| F | 1.28826300  | -7.38349400 | -0.10780500 |
| F | 6.75985900  | 0.89499900  | -2.10834800 |
| H | 6.55265800  | 2.52221500  | 1.05937500  |
| H | -1.85350400 | 7.41612000  | -0.61541700 |
| H | -8.23208200 | -0.11743600 | 0.28033200  |
| H | -1.53824700 | -7.41488600 | 0.30589100  |
| H | 6.43531000  | -1.89503500 | -1.63457200 |
| H | 3.58618100  | -2.82896000 | 2.66038900  |

CFSFO-6

0 1

|   |             |             |             |
|---|-------------|-------------|-------------|
| C | -3.32918300 | 1.32504000  | 1.96920900  |
| C | -3.60084500 | -1.10692900 | 1.62175600  |
| C | -3.34500200 | -2.49179400 | 1.40944900  |
| C | -2.02658800 | -4.21104900 | 1.08557300  |
| C | -0.73329800 | -4.78711300 | 0.93024300  |
| C | 1.68203600  | -5.19419300 | 0.60934200  |
| C | 3.08655000  | -5.02511400 | 0.45936000  |
| C | 4.91481400  | -3.83870200 | 0.24973000  |
| C | -1.22896100 | 4.11288100  | 2.33599800  |
| C | -2.39462200 | 4.78598700  | 2.40740000  |
| C | -3.45337100 | 3.86088500  | 2.29381500  |
| C | -2.83895100 | 2.65624800  | 2.14364100  |
| C | -3.29348300 | -4.71365500 | 1.06237900  |
| C | -4.12342700 | -3.59753800 | 1.25809500  |
| C | -4.80594400 | -0.46473900 | 1.69401300  |
| C | -4.62536200 | 0.91129900  | 1.87940200  |
| C | -0.40436100 | -6.09876400 | 0.75266000  |
| C | 0.95938600  | -6.35616500 | 0.57378700  |
| C | 5.31895000  | -5.14076100 | 0.22197000  |
| C | 4.13676400  | -5.88280000 | 0.35637900  |
| O | -2.05680900 | -2.88390700 | 1.30441900  |
| O | 3.57820300  | -3.76658400 | 0.39474200  |
| O | -1.50255400 | 2.80406100  | 2.17148900  |
| C | 5.61167700  | -2.60178200 | 0.14050900  |
| C | 6.28981900  | -0.23515600 | -0.06338500 |
| C | 7.36845700  | -1.07898900 | -0.06577800 |
| C | 6.30774400  | 1.18329800  | -0.16005200 |
| C | 5.40850000  | 3.17343500  | -0.29459000 |
| C | 6.75692600  | 3.38265700  | -0.27320900 |
| O | 5.13729900  | 1.85686800  | -0.22667700 |
| C | 7.31296000  | 2.09897300  | -0.18509200 |
| C | 6.95948200  | -2.40976800 | 0.04954100  |
| H | -0.19836600 | 4.40415000  | 2.36381200  |
| C | 4.29555200  | 4.05790000  | -0.37837700 |
| C | 2.06953000  | 5.11524900  | -0.56281000 |
| C | 3.06896700  | 6.04376700  | -0.45343200 |
| C | 4.31597500  | 5.42255000  | -0.35173400 |
| C | 0.67402400  | 5.36157500  | -0.67088600 |
| C | -1.42112000 | 4.79154800  | -0.93827500 |
| C | -1.43039200 | 6.14651700  | -0.77726400 |
| C | -2.45544200 | 3.82910100  | -1.10724600 |
| C | -3.81185500 | 1.78770500  | -1.38282000 |
| C | -4.59184000 | 2.89503800  | -1.18784500 |
| O | -0.16264700 | 4.31960600  | -0.87914900 |

|   |             |             |             |
|---|-------------|-------------|-------------|
| C | -0.08210500 | 6.48973800  | -0.60424200 |
| C | -3.80138600 | 4.03584500  | -1.03663000 |
| S | -2.27565500 | -0.02232800 | 1.80735100  |
| S | 0.68528400  | -3.81610000 | 0.87382400  |
| S | 4.79947400  | -1.08402000 | 0.08413100  |
| S | 2.67298700  | 3.50245700  | -0.53457600 |
| S | -2.13281500 | 2.16048700  | -1.37541200 |
| F | -4.31524100 | 5.23413500  | -0.80158700 |
| F | 5.44578600  | 6.10632100  | -0.23985200 |
| F | 7.81529200  | -3.42171400 | 0.06361500  |
| F | -1.32149700 | -7.05601200 | 0.73189000  |
| F | -5.64381000 | 1.76053900  | 1.94229700  |
| H | -5.66614800 | 2.88694500  | -1.13866400 |
| H | 2.91689000  | 7.10893500  | -0.44892600 |
| H | 8.39311700  | -0.76217700 | -0.14869000 |
| H | 1.37905100  | -7.33483200 | 0.42210400  |
| H | -5.76464900 | -0.94115700 | 1.59765500  |
| F | 0.39786100  | 7.70234500  | -0.41031800 |
| F | 8.59803700  | 1.80507900  | -0.13449800 |
| F | 4.03948700  | -7.19787100 | 0.37820100  |
| F | -5.44262200 | -3.60313900 | 1.28415900  |
| F | -2.52980200 | 6.09210100  | 2.54214800  |
| H | -2.28616400 | 6.79263400  | -0.76139500 |
| H | 7.26910200  | 4.32373200  | -0.31730800 |
| H | 6.32099700  | -5.50629100 | 0.11456700  |
| H | -3.58549500 | -5.73358000 | 0.90609000  |
| H | -4.50693500 | 4.05665800  | 2.30660500  |
| C | -4.25089700 | 0.44256000  | -1.55567400 |
| C | -5.47670600 | -0.14427300 | -1.56950800 |
| O | -3.32723000 | -0.53283900 | -1.71547200 |
| C | -5.31693300 | -1.52864700 | -1.73505300 |
| C | -3.97077700 | -1.71063100 | -1.82583400 |
| H | -6.07990900 | -2.28138700 | -1.78862500 |
| C | -3.15760000 | -2.87052700 | -2.01625300 |
| C | -3.57093900 | -4.16854600 | -2.08104000 |
| S | -1.45399400 | -2.79439000 | -2.22442800 |
| C | -2.54763100 | -5.10632200 | -2.29340300 |
| C | -1.34364900 | -4.48790700 | -2.39433200 |
| H | -2.70942700 | -6.16852100 | -2.35617500 |
| H | -0.38151100 | -4.94553700 | -2.54170200 |
| F | -4.84266200 | -4.51387500 | -1.92162500 |
| F | -6.62169700 | 0.49625900  | -1.42724300 |

TFSFO-1

0 1

|   |             |             |             |
|---|-------------|-------------|-------------|
| C | 3.12889600  | -0.80449100 | -0.00002200 |
| C | 3.02109600  | 0.54395500  | -0.00002900 |
| C | 1.67065500  | 0.94757400  | -0.00002000 |
| H | 3.84679600  | 1.23410500  | -0.00002200 |
| C | 0.76889900  | -0.07274300 | -0.00002000 |
| C | -0.66453700 | -0.00393200 | 0.00000800  |
| C | -1.62712800 | -0.96211800 | 0.00018100  |
| O | -1.22035300 | 1.21892300  | -0.00017200 |
| C | -2.84380100 | -0.24811800 | 0.00009700  |
| H | -1.49672100 | -2.02785600 | 0.00035600  |
| C | -2.55915300 | 1.06823500  | -0.00011500 |
| H | -3.15492700 | 1.95782600  | -0.00023700 |

|   |             |             |             |
|---|-------------|-------------|-------------|
| F | 1.32410800  | 2.22238100  | 0.00000100  |
| F | -4.04735200 | -0.78949600 | 0.00021100  |
| S | 1.60503900  | -1.57665100 | -0.00006900 |
| H | 4.02669400  | -1.39517500 | -0.00001600 |

TFSFO-2

0 1

|   |             |             |             |
|---|-------------|-------------|-------------|
| C | -6.72831000 | -0.60596700 | 0.00046000  |
| C | -5.94631700 | -1.71046900 | 0.00010500  |
| C | -4.58042400 | -1.36750700 | -0.00006300 |
| H | -6.30352800 | -2.72552800 | 0.00012300  |
| C | -4.32728000 | -0.02787900 | 0.00002300  |
| C | -3.06523900 | 0.64704200  | -0.00001500 |
| C | -2.73335400 | 1.96725000  | -0.00008900 |
| O | -1.95755300 | -0.11520300 | 0.00001200  |
| C | -1.33049300 | 1.98168100  | -0.00008300 |
| H | -3.39463900 | 2.81293600  | -0.00013900 |
| C | -0.88068900 | 0.70054300  | -0.00003700 |
| C | 0.41444900  | 0.10664500  | -0.00003200 |
| C | 0.70320100  | -1.22551200 | -0.00000800 |
| C | 2.08789700  | -1.44823400 | 0.00000200  |
| H | -0.03689200 | -2.00647800 | 0.00001000  |
| C | 2.85525900  | -0.32122300 | -0.00001700 |
| C | 4.28319700  | -0.20808700 | 0.00000900  |
| C | 5.11911600  | 0.86399600  | 0.00020100  |
| O | 4.98871700  | -1.35166700 | -0.00018500 |
| C | 6.41511000  | 0.30764400  | 0.00011100  |
| H | 4.85684300  | 1.90515400  | 0.00039400  |
| C | 6.29745400  | -1.03461600 | -0.00011900 |
| H | 7.00018300  | -1.84236500 | -0.00024900 |
| F | -3.63059400 | -2.28519300 | -0.00022000 |
| F | -0.55930900 | 3.05252800  | -0.00013700 |
| F | 2.59447200  | -2.66768500 | 0.00004000  |
| F | 7.54194700  | 0.99464200  | 0.00024000  |
| S | 1.84138400  | 1.07224500  | -0.00006000 |
| S | -5.81572600 | 0.83704000  | -0.00003400 |
| H | -7.80191500 | -0.55779200 | 0.00076400  |

TFSFO-3

0 1

|   |             |             |             |
|---|-------------|-------------|-------------|
| C | 6.68572800  | 0.22360300  | -0.00004300 |
| C | 6.69022700  | 1.58521800  | -0.00008900 |
| C | 5.33398400  | 1.94518700  | -0.00002500 |
| C | 4.58291600  | 0.81415400  | 0.00002200  |
| O | 5.42462200  | -0.24188600 | 0.00001600  |
| H | 7.53992500  | 2.24132800  | -0.00014800 |
| C | 3.18091000  | 0.56232800  | 0.00007100  |
| C | 2.56554300  | -0.65513200 | 0.00013000  |
| C | 1.17062600  | -0.52206500 | 0.00015100  |
| H | 3.08667300  | -1.59657600 | 0.00014900  |
| C | 0.71168400  | 0.76349800  | 0.00011200  |
| C | -0.63665300 | 1.23287300  | 0.00011300  |
| C | -1.17180700 | 2.48638200  | 0.00013700  |
| O | -1.61204900 | 0.30640300  | 0.00008200  |
| C | -2.55912600 | 2.28001700  | 0.00011200  |
| H | -0.65077100 | 3.42503300  | 0.00016800  |
| C | -2.80235500 | 0.94438000  | 0.00008500  |

|   |              |             |             |
|---|--------------|-------------|-------------|
| C | 7.74031800   | -0.74354700 | -0.00007000 |
| C | 7.65090700   | -2.10413000 | -0.00004500 |
| C | 8.88742700   | -2.77767300 | 0.00004200  |
| C | 9.92053000   | -1.90317400 | 0.00025800  |
| H | 8.97952100   | -3.84979500 | 0.00014300  |
| C | -3.99179000  | 0.16116800  | 0.00006100  |
| C | -4.08015600  | -1.19909000 | 0.00005900  |
| C | -5.41681600  | -1.62433600 | 0.00002200  |
| H | -3.23224600  | -1.86157900 | 0.00007600  |
| C | -6.34259100  | -0.62373400 | -0.00000200 |
| C | -7.77156300  | -0.71942000 | -0.00006100 |
| C | -8.75082000  | 0.22335200  | -0.00028800 |
| O | -8.30744300  | -1.95158000 | 0.00013900  |
| C | -9.95482300  | -0.51065600 | -0.00021500 |
| H | -8.63777300  | 1.29111200  | -0.00049200 |
| C | -9.64865500  | -1.82253700 | 0.00004100  |
| H | -10.22998900 | -2.72161100 | 0.00017200  |
| F | 6.50296100   | -2.75702200 | -0.00001600 |
| F | 4.84719100   | 3.17146700  | -0.00003200 |
| F | 0.36851600   | -1.57115400 | 0.00019700  |
| F | -3.49370600  | 3.21211000  | 0.00011900  |
| F | -5.73916700  | -2.90490200 | 0.00000100  |
| F | -11.16752400 | 0.01023200  | -0.00037600 |
| S | -5.54693300  | 0.90481600  | 0.00003400  |
| S | 2.04357700   | 1.85721800  | 0.00007100  |
| S | 9.39742800   | -0.27786100 | -0.00041500 |
| H | 10.97217000  | -2.12475400 | 0.00049800  |

TFSSFO-4

0 1

|   |             |             |             |
|---|-------------|-------------|-------------|
| C | -3.09164500 | -1.93353700 | -0.00043900 |
| C | -2.84151400 | -3.27358600 | -0.00068400 |
| C | -1.44232300 | -3.37351200 | -0.00061300 |
| C | -0.91471200 | -2.12227900 | -0.00030800 |
| O | -1.93855200 | -1.24174100 | -0.00021100 |
| H | -3.55339100 | -4.07710900 | -0.00089000 |
| C | 0.41360400  | -1.61007100 | -0.00009300 |
| C | 0.78419700  | -0.29710200 | 0.00028200  |
| C | 2.17843400  | -0.16006300 | 0.00032200  |
| H | 0.09227300  | 0.52695200  | 0.00046000  |
| C | 2.87630900  | -1.33319700 | 0.00000500  |
| C | 4.28911400  | -1.53842900 | -0.00009300 |
| C | 5.04855200  | -2.67001800 | -0.00033600 |
| O | 5.07517600  | -0.44663400 | 0.00008500  |
| C | 6.37295300  | -2.20955600 | -0.00030900 |
| H | 4.71169300  | -3.68937300 | -0.00050400 |
| C | 6.36440500  | -0.85154600 | -0.00004300 |
| C | -4.30186200 | -1.17692600 | -0.00037800 |
| C | -4.45665200 | 0.17958300  | -0.00016800 |
| C | -5.78375000 | 0.62708400  | -0.00010700 |
| C | -6.65987400 | -0.41873000 | -0.00026200 |
| H | -6.07707900 | 1.66234300  | 0.00009000  |
| C | 7.38419400  | 0.14312800  | 0.00013200  |
| C | 7.20969500  | 1.49533700  | 0.00044600  |
| C | 8.43963000  | 2.16934600  | 0.00052500  |
| H | 6.25037000  | 1.98257600  | 0.00060000  |
| C | 9.54035700  | 1.36498000  | 0.00028900  |



|   |              |             |             |
|---|--------------|-------------|-------------|
| C | 10.92320000  | 1.73747600  | 0.00028600  |
| C | 12.06986600  | 1.00735800  | -0.00012500 |
| O | 11.20466500  | 3.05122700  | 0.00076900  |
| C | 13.10472500  | 1.96568200  | 0.00015200  |
| H | 12.17070000  | -0.06160000 | -0.00057200 |
| C | 12.54460100  | 3.19089100  | 0.00068200  |
| H | 12.93610300  | 4.18736900  | 0.00102300  |
| F | -3.43940800  | 1.02109900  | 0.00002000  |
| F | -0.73454300  | -4.48665700 | -0.00079100 |
| F | 2.76183800   | 1.02430400  | 0.00059500  |
| F | 7.46103300   | -2.95671200 | -0.00049300 |
| F | 8.51022600   | 3.48822500  | 0.00080100  |
| F | 14.39671700  | 1.69565900  | -0.00009000 |
| C | -8.08141700  | -0.33933200 | -0.00018900 |
| C | -9.07657700  | -1.26273000 | -0.00030200 |
| O | -8.65193200  | 0.88396700  | 0.00003900  |
| C | -10.31086500 | -0.59525500 | -0.00016200 |
| C | -9.98753300  | 0.72774000  | 0.00004400  |
| H | -11.29052200 | -1.03408100 | -0.00020400 |
| C | -10.77427400 | 1.92324500  | 0.00026100  |
| C | -10.34148000 | 3.21685500  | 0.00048600  |
| C | -11.36625600 | 4.18223900  | 0.00052000  |
| C | -12.58723300 | 3.59836600  | 0.00035400  |
| H | -11.18378600 | 5.24270900  | 0.00058100  |
| F | -8.88800800  | -2.56858300 | -0.00050600 |
| F | -9.06495100  | 3.55571200  | 0.00051100  |
| S | 9.05317200   | -0.28760600 | -0.00003800 |
| S | 1.77796000   | -2.66265800 | -0.00018800 |
| S | -5.84894600  | -1.93892800 | -0.00062500 |
| S | -12.49496100 | 1.89344100  | 0.00036500  |
| H | -13.54818600 | 4.07960000  | 0.00026200  |

TFSFO-5

0 1

|   |             |             |             |
|---|-------------|-------------|-------------|
| C | 0.61018400  | -3.27581600 | -0.00034600 |
| C | 1.12824500  | -4.53735000 | -0.00063500 |
| C | 2.51858600  | -4.34964600 | -0.00061900 |
| C | 2.77967700  | -3.01740900 | -0.00033300 |
| O | 1.59857900  | -2.36371100 | -0.00016200 |
| H | 0.59393200  | -5.46845600 | -0.00083400 |
| C | 3.97615800  | -2.24686500 | -0.00021100 |
| C | 4.07274700  | -0.88606700 | 0.00009100  |
| C | 5.41020200  | -0.46976100 | 0.00010300  |
| H | 3.22833900  | -0.21919800 | 0.00029000  |
| C | 6.33115900  | -1.47759000 | -0.00018100 |
| C | 7.75550200  | -1.38224900 | -0.00027100 |
| C | 8.74175900  | -2.32285500 | -0.00059600 |
| O | 8.28698000  | -0.14656700 | -0.00001800 |
| C | 9.93540400  | -1.58658100 | -0.00052800 |
| H | 8.63271900  | -3.39084900 | -0.00085400 |
| C | 9.63293700  | -0.26295000 | -0.00017800 |
| C | -0.72722600 | -2.77715000 | -0.00022700 |
| C | -1.14740200 | -1.47761700 | 0.00003800  |
| C | -2.53614600 | -1.30132000 | 0.00006800  |
| C | -3.18866300 | -2.49975600 | -0.00018500 |
| H | -3.02892300 | -0.34479900 | 0.00025800  |
| C | 10.41071500 | 0.92961600  | 0.00003100  |

|   |              |             |             |
|---|--------------|-------------|-------------|
| C | 9.94147800   | 2.20972300  | 0.00043900  |
| C | 10.99155900  | 3.13896200  | 0.00052300  |
| H | 8.89781100   | 2.47169900  | 0.00066500  |
| C | 12.24327900  | 2.59906500  | 0.00018900  |
| C | 13.51257900  | 3.26261300  | 0.00016700  |
| C | 14.78876600  | 2.79379000  | -0.00023800 |
| O | 13.50760000  | 4.60590300  | 0.00062400  |
| C | 15.59555600  | 3.95090200  | 0.00000200  |
| H | 15.11552900  | 1.77097800  | -0.00065400 |
| C | 14.78655600  | 5.02827800  | 0.00052100  |
| H | 14.95614900  | 6.08540500  | 0.00084600  |
| F | -0.31709800  | -0.45092100 | 0.00025100  |
| F | 3.44340600   | -5.29099800 | -0.00084800 |
| F | 5.74227300   | 0.80819600  | 0.00037000  |
| F | 11.16018500  | -2.07792800 | -0.00076600 |
| F | 10.76484900  | 4.43993400  | 0.00090000  |
| F | 16.91539400  | 3.96285800  | -0.00024700 |
| C | -4.59801200  | -2.69696500 | -0.00025200 |
| C | -5.39945400  | -3.79340600 | -0.00051000 |
| O | -5.39197200  | -1.60462300 | -0.00004400 |
| C | -6.73781900  | -3.37445700 | -0.00046700 |
| C | -6.67347500  | -2.01265600 | -0.00017600 |
| H | -7.61602600  | -3.99190000 | -0.00063300 |
| C | -7.67484200  | -0.99529400 | -0.00000500 |
| C | -7.50670100  | 0.35987000  | 0.00026400  |
| C | -8.69171800  | 1.10632900  | 0.00035600  |
| C | -9.78893200  | 0.29559300  | 0.00015100  |
| H | -8.73209000  | 2.18147000  | 0.00056100  |
| C | -11.15258200 | 0.70524600  | 0.00016400  |
| C | -12.33580900 | 0.03969200  | -0.00002200 |
| O | -11.42173500 | 2.02797100  | 0.00039500  |
| C | -13.38027100 | 0.97670600  | 0.00009500  |
| C | -12.75659800 | 2.18771200  | 0.00035200  |
| H | -14.43529300 | 0.77850500  | -0.00000100 |
| C | -13.24716800 | 3.53187100  | 0.00057100  |
| C | -12.53212600 | 4.69309500  | 0.00079700  |
| C | -13.31078200 | 5.86593700  | 0.00097200  |
| C | -14.63285300 | 5.57436400  | 0.00087600  |
| H | -12.89231200 | 6.85727000  | 0.00115600  |
| F | -4.96639700  | -5.03936000 | -0.00076400 |
| F | -6.32124900  | 0.94037300  | 0.00042700  |
| F | -12.45668400 | -1.27371600 | -0.00027100 |
| F | -11.21205200 | 4.73189900  | 0.00084800  |
| S | 12.13339000  | 0.87845900  | -0.00024500 |
| S | 5.52547500   | -3.00217300 | -0.00047600 |
| S | -2.09328100  | -3.83009600 | -0.00045100 |
| S | -9.35713000  | -1.37243000 | -0.00015100 |
| S | -14.92949000 | 3.89312100  | 0.00057500  |
| H | -15.45933600 | 6.26134600  | 0.00096500  |

TFSFO-6

0 1

|   |            |             |             |
|---|------------|-------------|-------------|
| C | 4.28939600 | -3.94361000 | -0.00044100 |
| C | 5.04143300 | -5.08094300 | -0.00098200 |
| C | 6.36878200 | -4.62922300 | -0.00102700 |
| C | 6.36913200 | -3.27109100 | -0.00053500 |
| O | 5.08281200 | -2.85765300 | -0.00017300 |

|   |              |             |             |
|---|--------------|-------------|-------------|
| H | 4.69742600   | -6.09787000 | -0.00131800 |
| C | 7.39232200   | -2.28154700 | -0.00036000 |
| C | 7.21800600   | -0.92835900 | 0.00028500  |
| C | 8.44652100   | -0.25588200 | 0.00023800  |
| H | 6.25864800   | -0.44131900 | 0.00075800  |
| C | 9.54882900   | -1.06178100 | -0.00042100 |
| C | 10.92513000  | -0.68244300 | -0.00067400 |
| C | 12.08336600  | -1.40129500 | -0.00147500 |
| O | 11.19272500  | 0.63567600  | -0.00006300 |
| C | 13.10112500  | -0.43565900 | -0.00131400 |
| H | 12.19553400  | -2.46894600 | -0.00210200 |
| C | 12.53326100  | 0.79773800  | -0.00045800 |
| C | 2.87915700   | -3.72357300 | -0.00017000 |
| C | 2.19815900   | -2.54017800 | 0.00009800  |
| C | 0.80263300   | -2.65637600 | 0.00025300  |
| C | 0.41311100   | -3.96416100 | 0.00009800  |
| H | 0.12239600   | -1.82266300 | 0.00045800  |
| C | 13.05005600  | 2.12458000  | 0.00006600  |
| C | 12.32872800  | 3.28155300  | 0.00115900  |
| C | 13.16669600  | 4.40577600  | 0.00137700  |
| H | 11.25348400  | 3.32365300  | 0.00178100  |
| C | 14.50243700  | 4.13287200  | 0.00047300  |
| C | 15.60819500  | 5.04294400  | 0.00041900  |
| C | 16.95369100  | 4.84701300  | -0.00055100 |
| O | 15.32660800  | 6.35655300  | 0.00152000  |
| C | 17.50472000  | 6.14549000  | 0.00003000  |
| H | 17.48486400  | 3.91395300  | -0.00155000 |
| C | 16.49131000  | 7.03302800  | 0.00127800  |
| H | 16.43979500  | 8.10242600  | 0.00206500  |
| F | 2.79827500   | -1.36434800 | 0.00020000  |
| F | 7.45327300   | -5.38080100 | -0.00148500 |
| F | 8.51792300   | 1.06276600  | 0.00079800  |
| F | 14.40145700  | -0.66312600 | -0.00189200 |
| F | 12.68101200  | 5.63387700  | 0.00240300  |
| F | 18.79387200  | 6.42893100  | -0.00056500 |
| C | -0.92282400  | -4.45470900 | 0.00016800  |
| C | -1.47186800  | -5.69684900 | 0.00013200  |
| O | -1.93153100  | -3.55690000 | 0.00028000  |
| C | -2.86895600  | -5.57312700 | 0.00022100  |
| C | -3.09634400  | -4.22870400 | 0.00031100  |
| H | -3.59448600  | -6.36429900 | 0.00021000  |
| C | -4.29199600  | -3.44970600 | 0.00038900  |
| C | -4.41907300  | -2.09016300 | 0.00031500  |
| C | -5.73653900  | -1.61526000 | 0.00036800  |
| C | -6.63442400  | -2.64316400 | 0.00048500  |
| H | -6.00765700  | -0.57404400 | 0.00031700  |
| C | -8.05372300  | -2.53843800 | 0.00055200  |
| C | -9.06375800  | -3.44689200 | 0.00070800  |
| O | -8.60579400  | -1.30594600 | 0.00043500  |
| C | -10.28697700 | -2.76250900 | 0.00068400  |
| C | -9.94407500  | -1.44280100 | 0.00051100  |
| H | -11.27313900 | -3.18660200 | 0.00077500  |
| C | -10.71884800 | -0.24406500 | 0.00038400  |
| C | -10.28325000 | 1.05009400  | 0.00014700  |
| C | -11.29570200 | 2.01823300  | 0.00004000  |
| C | -12.53290400 | 1.44286600  | 0.00020100  |
| H | -11.12104600 | 3.07991400  | -0.00015000 |

|   |              |             |             |
|---|--------------|-------------|-------------|
| F | -0.78279500  | -6.82157200 | 0.00002400  |
| F | -3.38446800  | -1.26999500 | 0.00019600  |
| F | -8.89527600  | -4.75556800 | 0.00085100  |
| F | -9.00470500  | 1.37924800  | 0.00001700  |
| S | 14.74651800  | 2.42619300  | -0.00070300 |
| S | 9.06027400   | -2.71536100 | -0.00102100 |
| S | 1.76140200   | -5.03722100 | -0.00023700 |
| S | -5.85401300  | -4.17989500 | 0.00053400  |
| S | -12.44210500 | -0.27802400 | 0.00049200  |
| C | -13.78955100 | 2.11311400  | 0.00014600  |
| C | -15.08024500 | 1.69103700  | 0.00029300  |
| O | -13.79590000 | 3.46312900  | -0.00011300 |
| C | -15.92170800 | 2.81346500  | 0.00011800  |
| C | -15.07397200 | 3.87964300  | -0.00013300 |
| H | -16.99512700 | 2.82451200  | 0.00016800  |
| C | -15.29878900 | 5.29262400  | -0.00040100 |
| C | -14.38006900 | 6.30032300  | -0.00067000 |
| S | -16.88448700 | 5.96244100  | -0.00042200 |
| C | -14.92610600 | 7.59796500  | -0.00089800 |
| C | -16.27925700 | 7.55878600  | -0.00079700 |
| H | -14.32945600 | 8.49346500  | -0.00112400 |
| H | -16.96305600 | 8.38791500  | -0.00091900 |
| F | -13.07568200 | 6.09466000  | -0.00072200 |
| F | -15.45759700 | 0.42716100  | 0.00055500  |
