# Supplementary material for: Folding oligomers of difluorinated thienylfurans: a DFT study
Source: Royal Society of Chemistry journal article supplement (doi:10.1039/b916415d), 2009-11-18
Supplement: b916415d.zip [file b916415d.zip]

# MPWB1K/6-31G(d) optimized geometries

Total energies (Hartrees) for oligomers of size n = 1-6

|       |              |              |              |              |              |              |
|-------|--------------|--------------|--------------|--------------|--------------|--------------|
| 2FO-S | 1            | 2            | 3            | 4            | 5            | 6            |
| cis   | -980.0968964 | -1959.025273 | -2937.954072 | -3916.882531 | -4895.816593 | -5874.752013 |
| trans | -980.0965596 | -1959.024299 | -2937.952157 | -3916.88006  | -4895.807932 | -5874.735763 |
| 2FS-O | 1            | 2            | 3            | 4            | 5            | 6            |
| cis   | -980.1052484 | -1959.041871 | -2937.978519 | -3916.91571  | -4895.856922 | -5874.803502 |
| trans | -980.101681  | -1959.031174 | -2937.960501 | -3916.889934 | -4895.819416 | -5874.748769 |
| FO-FS | 1            | 2            | 3            | 4            | 5            | 6            |
| cis   | -980.1060055 | -1959.044304 | -2937.982467 | -3916.921161 | -4895.864693 | -5874.809482 |
| trans | -980.1023731 | -1959.036941 | -2937.971746 | -3916.906713 | -4895.841755 | -5874.779986 |
| FS-FO | 1            | 2            | 3            | 4            | 5            | 6            |
| cis   | -980.1060661 | -1959.043949 | -2937.982601 | -3916.921625 | -4895.865315 | -5874.810652 |
| trans | -980.1057723 | -1959.040373 | -2937.975091 | -3916.910072 | -4895.845068 | -5874.777672 |

# B3LYP/6-31G(d) optimized geometries

zero-point energies (Hartrees) for oligomers of size n = 1-5

|       |          |          |          |          |          |
|-------|----------|----------|----------|----------|----------|
| 2FO-S | 1        | 2        | 3        | 4        | 5        |
| cis   | 0.101629 | 0.183126 | 0.264549 | 0.346017 | 0.427567 |
| trans | 0.101608 | 0.183084 | 0.264492 | 0.345863 |          |
| 2FS-O | 1        | 2        | 3        | 4        | 5        |
| cis   | 0.10159  | 0.183087 | 0.264532 | 0.345952 | 0.427525 |
| trans | 0.101441 | 0.182728 | 0.263983 | 0.345146 |          |
| FO-FS | 1        | 2        | 3        | 4        | 5        |
| cis   | 0.10152  | 0.183017 | 0.264446 | 0.345801 | 0.427302 |
| trans | 0.101449 | 0.182827 | 0.264143 | 0.345449 | 0.426725 |
| FS-FO | 1        | 2        | 3        | 4        | 5        |
| cis   | 0.101576 | 0.183051 | 0.264422 | 0.345839 | 0.427303 |
| trans | 0.101449 | 0.182827 | 0.264143 | 0.345449 |          |

B3LYP/6-31G(d) optimized geometries  
Total energies (Hartrees) for oligomers of size n = 1-6

|       |              |              |              |              |              |              |
|-------|--------------|--------------|--------------|--------------|--------------|--------------|
| 2FO-S | 1            | 2            | 3            | 4            | 5            | 6            |
| cis   | -980.2827119 | -1959.384239 | -2938.486007 | -3917.587598 | -4896.689964 | -5875.791998 |
| trans | -980.2823714 | -1959.383137 | -2938.484188 | -3917.585199 | -4896.686193 | -5875.787199 |
| 2FS-O | 1            | 2            | 3            | 4            | 5            | 6            |
| cis   | -980.29054   | -1959.399614 | -2938.508941 | -3917.617996 | -4896.727943 | -5875.837229 |
| trans | -980.2870859 | -1959.388957 | -2938.491071 | -3917.59306  | -4896.69513  | -5875.797137 |
| FO-FS | 1            | 2            | 3            | 4            | 5            | 6            |
| cis   | -980.2913154 | -1959.401892 | -2938.512918 | -3917.623761 | -4896.73546  | -5875.846587 |
| trans | -980.2909961 | -1959.39787  | -2938.505203 | -3917.61255  | -4896.71999  | -5875.827455 |
| FS-FO | 1            | 2            | 3            | 4            | 5            | 6            |
| cis   | -980.2912453 | -1959.401786 | -2938.512736 | -3917.62364  | -4896.735323 | -5875.846434 |
| trans | -980.2876086 | -1959.394418 | -2938.501712 | -3917.609082 | -4896.716518 | -5875.823978 |
