# Supplementary material for: Folding oligomers of difluorinated thienylfurans: a DFT study
Source: Royal Society of Chemistry journal article supplement (doi:10.1039/b916415d), 2009-11-18
Supplement: b916415d.zip [file b916415d.zip]

Cartesian coordinates of MPWB1K/6-31G(d) optimized geometries  
all-cisoid C2FSO-n, and all-transoid T2FSO-n, n = 1-6.  
Charge and multiplicity are given first.

C2FSO-1

0 1

|   |             |             |             |
|---|-------------|-------------|-------------|
| C | 3.41357900  | -0.51583100 | -0.00024600 |
| C | 1.33692300  | 0.10044800  | 0.00007200  |
| C | -0.07251200 | -0.15358900 | 0.00006400  |
| C | -2.34051100 | -1.15345600 | 0.00024200  |
| C | 2.06953600  | 1.24222300  | 0.00040800  |
| C | 3.42812600  | 0.83222100  | 0.00019000  |
| C | -1.07076200 | 0.76501200  | -0.00008600 |
| C | -2.36005400 | 0.19565300  | -0.00001200 |
| O | 2.14994600  | -0.97324200 | -0.00032200 |
| S | -0.73290700 | -1.74216200 | 0.00006300  |
| F | -3.44686400 | 0.94516200  | -0.00011000 |
| F | -0.87251200 | 2.07333800  | -0.00024700 |
| H | 1.67732000  | 2.24139900  | 0.00077700  |
| H | 4.29806700  | 1.46194800  | 0.00033300  |
| H | 4.18118200  | -1.26450600 | -0.00054700 |
| H | -3.18118700 | -1.82090300 | 0.00042400  |

C2FSO-2

0 1

|   |             |             |             |
|---|-------------|-------------|-------------|
| C | -5.33425000 | -2.88310000 | 0.00034600  |
| C | -4.44814000 | -0.90633300 | -0.00007800 |
| C | -3.33792200 | -0.00579300 | 0.00004700  |
| C | -1.08863700 | 1.05373300  | 0.00031400  |
| C | 0.30830900  | 1.34306000  | 0.00054900  |
| C | 2.40813700  | 0.77638300  | 0.00039600  |
| C | -5.79291200 | -0.71826700 | -0.00075800 |
| C | -6.36664400 | -2.01525500 | -0.00044300 |
| C | -3.37887400 | 1.35294400  | -0.00047400 |
| C | -2.11132500 | 1.95028900  | -0.00032500 |
| C | 2.38033300  | 2.13503200  | 0.00111700  |
| C | 1.01733300  | 2.50364200  | 0.00126500  |
| O | -4.16386500 | -2.22286500 | 0.00068900  |
| O | 1.15063700  | 0.28998900  | 0.00003700  |
| C | 3.47048500  | -0.17877300 | 0.00005000  |
| C | 4.86969400  | -2.22316300 | -0.00050000 |
| C | 5.59862200  | -1.08734600 | -0.00048900 |
| C | 4.80455800  | 0.07613900  | -0.00022200 |
| S | -1.70564800 | -0.55590800 | 0.00090600  |
| S | 3.19394400  | -1.87716900 | 0.00000000  |
| F | 6.91686800  | -1.02455700 | -0.00081000 |
| F | 5.32414200  | 1.29226400  | -0.00025500 |
| F | -1.94387600 | 3.26198900  | -0.00073500 |
| F | -4.49707600 | 2.05935800  | -0.00112200 |
| H | 3.23830600  | 2.78010300  | 0.00156100  |
| H | 0.60155000  | 3.49301900  | 0.00181800  |
| H | -6.29473000 | 0.23043700  | -0.00140800 |
| H | -7.41104600 | -2.26528400 | -0.00079400 |
| H | -5.26661400 | -3.95324600 | 0.00081000  |
| H | 5.23250700  | -3.23343000 | -0.00077100 |

C2FSO-3

0 1

|   |             |             |             |
|---|-------------|-------------|-------------|
| C | -4.76306000 | 4.95505300  | -0.00052500 |
| C | -5.39875200 | 2.88420200  | -0.00003800 |
| C | -5.15870800 | 1.47516300  | 0.00006600  |
| C | -4.17740500 | -0.80950800 | 0.00012500  |
| C | -3.31939600 | -1.94887400 | 0.00012400  |
| C | -1.36769000 | -2.91085100 | 0.00000700  |
| C | -6.53438700 | 3.62863500  | 0.00026100  |
| C | -6.11128300 | 4.98225000  | -0.00006900 |
| C | -6.08986500 | 0.48517300  | 0.00020700  |
| C | -5.53823200 | -0.80262700 | 0.00025000  |
| C | -2.28814600 | -3.91282800 | 0.00016400  |
| C | -3.55312500 | -3.28922500 | 0.00022300  |
| O | -4.31726200 | 3.68735500  | -0.00051200 |
| O | -1.99129400 | -1.71454400 | -0.00000900 |
| C | 0.05786400  | -2.90005300 | -0.00007300 |
| C | 2.47113400  | -2.30279900 | -0.00007000 |
| C | 2.24392100  | -3.64454900 | -0.00027800 |
| C | 3.73479600  | -1.64255800 | 0.00000200  |
| C | 4.99864800  | 0.12719700  | 0.00003300  |
| C | 5.83896200  | -0.94134900 | 0.00021100  |
| O | 3.71794600  | -0.29447400 | -0.00010400 |
| C | 5.01917700  | -2.09048500 | 0.00018400  |
| C | 0.88507500  | -3.98076700 | -0.00028700 |
| C | 5.21465200  | 1.53935500  | -0.00004000 |
| C | 5.00394900  | 4.00768200  | -0.00035900 |
| C | 6.28722600  | 3.58998500  | 0.00016000  |
| C | 6.40881500  | 2.18643700  | 0.00035300  |
| S | -3.57225300 | 0.80500200  | -0.00007400 |
| S | 0.97739400  | -1.44273700 | 0.00016500  |
| S | 3.92539200  | 2.67934200  | -0.00066800 |
| F | 7.34729800  | 4.37590900  | 0.00049300  |
| F | 7.58114900  | 1.57446400  | 0.00085600  |
| F | 3.20245300  | -4.55471800 | -0.00048200 |
| F | 0.46372100  | -5.23392800 | -0.00049400 |
| F | -6.28467800 | -1.89401800 | 0.00041600  |
| F | -7.39491000 | 0.69863400  | 0.00032700  |
| H | 6.91129700  | -0.89520500 | 0.00033200  |
| H | 5.32557800  | -3.11910400 | 0.00028200  |
| H | -2.07087000 | -4.96381800 | 0.00022700  |
| H | -4.51748500 | -3.75941800 | 0.00033400  |
| H | -7.53759300 | 3.24673800  | 0.00065300  |
| H | -6.73253900 | 5.85823800  | 0.00004200  |
| H | -4.00740200 | 5.71575700  | -0.00087000 |
| H | 4.64507200  | 5.01938400  | -0.00057300 |

C2FSO-4

0 1

|   |             |             |             |
|---|-------------|-------------|-------------|
| C | -0.44376100 | 5.33554200  | 1.20276900  |
| C | -2.44984000 | 4.72070300  | 0.65661800  |
| C | -3.44226600 | 3.73284000  | 0.36841000  |
| C | -4.69780600 | 1.62716600  | -0.03307300 |
| C | -5.09258700 | 0.26585600  | -0.19471300 |
| C | -4.66073600 | -1.86811500 | -0.26500500 |
| C | -2.47281300 | 6.07685200  | 0.71621900  |
| C | -1.15811000 | 6.47267100  | 1.07246900  |
| C | -4.75954800 | 3.93139200  | 0.09594300  |

|   |             |             |             |
|---|-------------|-------------|-------------|
| C | -5.46929900 | 2.74295900  | -0.12905000 |
| C | -5.99923600 | -1.74140200 | -0.47033500 |
| C | -6.27912300 | -0.35801800 | -0.42521100 |
| O | -1.21621600 | 4.26454800  | 0.94975600  |
| O | -4.10760600 | -0.64904500 | -0.09727400 |
| C | -3.75750300 | -2.96932300 | -0.20025000 |
| C | -1.73697800 | -4.40630200 | -0.04197900 |
| C | -2.89436900 | -5.11159400 | -0.16523400 |
| C | -0.40118700 | -4.89359300 | 0.06496800  |
| C | 1.75070400  | -4.57706600 | 0.18631900  |
| C | 1.55834400  | -5.92261200 | 0.23543800  |
| O | 0.56220700  | -3.94958300 | 0.08327100  |
| C | 0.16339200  | -6.12790500 | 0.15707700  |
| C | -4.03457100 | -4.30033700 | -0.25500200 |
| C | 2.90079200  | -3.73452000 | 0.20615900  |
| C | 4.46856100  | -1.80929400 | 0.15155900  |
| C | 5.09056000  | -3.00976400 | 0.30697700  |
| C | 4.20561400  | -4.09643600 | 0.33897800  |
| C | 5.06662300  | -0.51707600 | 0.07095600  |
| C | 4.97172500  | 1.64121500  | -0.18552100 |
| C | 6.28496100  | 1.33430500  | -0.01377000 |
| C | 4.27413600  | 2.86848400  | -0.40858400 |
| C | 2.59587300  | 4.64234000  | -0.82675000 |
| C | 3.85282800  | 5.12282500  | -0.71486000 |
| O | 4.22736200  | 0.51889200  | -0.13405500 |
| C | 6.34690500  | -0.06626000 | 0.15396300  |
| C | 4.80821000  | 4.11557100  | -0.47629700 |
| S | -3.07127100 | 2.05229700  | 0.34547000  |
| S | -2.06272800 | -2.71470500 | -0.03522800 |
| S | 2.76411300  | -2.02543500 | 0.04099500  |
| S | 2.57018700  | 2.94115100  | -0.64079200 |
| F | 4.19654500  | 6.39339800  | -0.80977000 |
| F | 6.09712500  | 4.37608900  | -0.33495400 |
| F | 6.39995000  | -3.15186700 | 0.41772000  |
| F | 4.61266400  | -5.34578300 | 0.48091800  |
| F | -2.95725500 | -6.43108700 | -0.20028600 |
| F | -5.25317700 | -4.79603800 | -0.38108900 |
| F | -6.76162300 | 2.72553100  | -0.40586900 |
| F | -5.33162800 | 5.12239300  | 0.04778500  |
| H | 7.09692400  | 2.03631300  | -0.01062400 |
| H | 7.21750000  | -0.67323100 | 0.31417700  |
| H | 2.32955900  | -6.66476200 | 0.31625300  |
| H | -0.36006200 | -7.06463100 | 0.16913000  |
| H | -6.69040300 | -2.54574000 | -0.63602800 |
| H | -7.23088300 | 0.12313300  | -0.54479800 |
| H | -3.32523000 | 6.70152700  | 0.52925400  |
| H | -0.79717400 | 7.47361600  | 1.21845800  |
| H | 0.57469000  | 5.12518800  | 1.46555100  |
| H | 1.69390900  | 5.19682500  | -1.00727700 |

C2FSO-5

0 1

|   |             |             |             |
|---|-------------|-------------|-------------|
| C | -4.54410200 | -2.30712100 | -1.97125000 |
| C | -5.20388400 | -0.30249700 | -1.47991700 |
| C | -4.97967800 | 1.06387300  | -1.12647600 |
| C | -4.02669300 | 3.28275700  | -0.52679900 |
| C | -3.19382700 | 4.40015900  | -0.22149300 |

|   |             |             |             |
|---|-------------|-------------|-------------|
| C | -1.27634800 | 5.37489400  | 0.10781600  |
| C | -6.32979600 | -1.02368200 | -1.71844400 |
| C | -5.89101500 | -2.33334900 | -2.03965600 |
| C | -5.92161500 | 2.02511700  | -0.93708500 |
| C | -5.38600000 | 3.27468400  | -0.59988100 |
| C | -2.22694200 | 6.33700200  | 0.25888700  |
| C | -3.46810600 | 5.70593600  | 0.04596700  |
| O | -4.11435600 | -1.08083300 | -1.62627500 |
| O | -1.86051100 | 4.19333300  | -0.18291200 |
| C | 0.14696000  | 5.41302100  | 0.19181400  |
| C | 2.59086400  | 4.94297600  | 0.24047200  |
| C | 2.28397500  | 6.25581800  | 0.43121600  |
| C | 3.90087800  | 4.38042200  | 0.20279400  |
| C | 5.32616100  | 2.74295100  | 0.05890900  |
| C | 6.06130200  | 3.88266400  | 0.16848400  |
| O | 4.00963200  | 3.04088500  | 0.07973800  |
| C | 5.13910300  | 4.94257900  | 0.26174800  |
| C | 0.91120500  | 6.51972800  | 0.40408400  |
| C | 5.68969700  | 1.36943800  | -0.06203200 |
| C | 5.75821200  | -1.11147900 | -0.22567200 |
| C | 6.98747900  | -0.52978400 | -0.27113500 |
| C | 6.94972200  | 0.86565700  | -0.17862700 |
| C | 5.47032300  | -2.50575800 | -0.29964100 |
| C | 4.13106000  | -4.21991500 | -0.26615900 |
| C | 5.38140200  | -4.71562100 | -0.46882700 |
| C | 2.84581800  | -4.82545200 | -0.14992500 |
| C | 0.42984900  | -5.30959600 | 0.16209300  |
| C | 1.16984000  | -6.41393800 | -0.12867900 |
| O | 4.18069000  | -2.87578000 | -0.16248400 |
| C | 6.24969300  | -3.60510200 | -0.49081800 |
| C | 2.53272300  | -6.14120100 | -0.30370700 |
| S | -3.40258200 | 1.71384500  | -0.88174600 |
| S | 1.14980900  | 4.02018800  | 0.02401800  |
| S | 4.53330600  | 0.09082000  | -0.06742800 |
| S | 1.43365300  | -3.91146600 | 0.22011200  |
| C | -0.97744900 | -5.23758000 | 0.38125900  |
| C | -1.99076000 | -6.13652800 | 0.26545000  |
| O | -1.46711300 | -4.04140600 | 0.76766400  |
| C | -3.17485500 | -5.44447600 | 0.60140800  |
| C | -2.80271200 | -4.17134400 | 0.90037800  |
| C | -3.52509600 | -3.00544700 | 1.30066900  |
| C | -4.87409300 | -2.84903000 | 1.33045000  |
| S | -2.74853800 | -1.54093300 | 1.75941000  |
| C | -5.28033900 | -1.55754600 | 1.71707400  |
| C | -4.24099600 | -0.73912800 | 1.98861800  |
| H | -4.28046200 | 0.28786200  | 2.29892800  |
| F | -6.55497100 | -1.22548300 | 1.79078600  |
| F | -5.73495500 | -3.79781000 | 1.00398100  |
| F | 0.66691900  | -7.63127800 | -0.24215900 |
| F | 3.41589100  | -7.08183700 | -0.59098400 |
| F | 8.11919600  | -1.20159800 | -0.39169900 |
| F | 8.04498000  | 1.60509100  | -0.20342600 |
| F | 3.18254000  | 7.20647700  | 0.62180100  |
| F | 0.42284200  | 7.73703600  | 0.56975000  |
| F | -6.14798600 | 4.33269900  | -0.38054900 |
| F | -7.22196500 | 1.82109500  | -1.05765000 |
| H | -4.17614000 | -5.82950400 | 0.62879300  |

|   |             |             |             |
|---|-------------|-------------|-------------|
| H | -1.88913200 | -7.16345800 | -0.02883900 |
| H | 5.63613500  | -5.75132800 | -0.58508300 |
| H | 7.31362300  | -3.60524800 | -0.63124200 |
| H | 7.13213700  | 3.94385200  | 0.18245700  |
| H | 5.35183000  | 5.98962200  | 0.35742200  |
| H | -2.04672100 | 7.36857200  | 0.49236000  |
| H | -4.44349400 | 6.15091000  | 0.08025200  |
| H | -7.33675800 | -0.65587300 | -1.66897600 |
| H | -6.50159600 | -3.18181900 | -2.28507500 |
| H | -3.78071700 | -3.04660000 | -2.11555200 |

# 2FSO-6

0 1

|   |             |             |             |
|---|-------------|-------------|-------------|
| C | 3.56327700  | -1.72656100 | 2.01216000  |
| C | 3.84846000  | 0.70672800  | 1.58844600  |
| C | 3.67969000  | 2.10872600  | 1.39036600  |
| C | 2.47253600  | 3.89848300  | 1.12895000  |
| C | 1.22831800  | 4.57568200  | 0.97933300  |
| C | -1.16016400 | 5.18234100  | 0.66895200  |
| C | -2.57808400 | 5.18994200  | 0.52599000  |
| C | -4.51041900 | 4.21062500  | 0.31897600  |
| C | 1.47586800  | -4.48774000 | 2.54759600  |
| C | 2.62650300  | -5.19115500 | 2.59419100  |
| C | 3.67168600  | -4.25157500 | 2.40744500  |
| C | 3.06588200  | -3.04482100 | 2.25590200  |
| C | 3.77112000  | 4.30670100  | 1.10058400  |
| C | 4.55403800  | 3.14432400  | 1.26431300  |
| C | 5.01346100  | 0.00764100  | 1.54358600  |
| C | 4.85246500  | -1.36340700 | 1.78074200  |
| C | 1.03045700  | 5.90759500  | 0.77835800  |
| C | -0.31716100 | 6.24960400  | 0.60631300  |
| C | -4.75450300 | 5.54927800  | 0.29395100  |
| C | -3.50195600 | 6.18402400  | 0.42796800  |
| O | 2.41392900  | 2.56337300  | 1.30937400  |
| O | -3.18777400 | 3.98839600  | 0.46031400  |
| O | 1.72863800  | -3.18430800 | 2.34543600  |
| C | -5.34550000 | 3.05969100  | 0.21462000  |
| C | -6.27441000 | 0.76071500  | 0.03370600  |
| C | -7.22649300 | 1.73389300  | 0.02872100  |
| C | -6.48691700 | -0.64649400 | -0.05166900 |
| C | -5.81585800 | -2.71312200 | -0.17194100 |
| C | -7.17618400 | -2.75136000 | -0.16648900 |
| O | -5.39237400 | -1.43374200 | -0.10250700 |
| C | -7.61096900 | -1.41285700 | -0.08947800 |
| C | -6.70397400 | 3.02857600  | 0.12996500  |
| H | 0.44047200  | -4.75673800 | 2.62597000  |
| C | -4.81446300 | -3.72642300 | -0.23834800 |
| C | -2.70402900 | -5.03418700 | -0.39431100 |
| C | -3.81885400 | -5.81049000 | -0.30218700 |
| C | -5.00645700 | -5.07433300 | -0.21465500 |
| C | -1.35093400 | -5.47335600 | -0.49803000 |
| C | 0.78224400  | -5.14022400 | -0.78412600 |
| C | 0.62291200  | -6.48102700 | -0.61724000 |
| C | 1.91847700  | -4.30707700 | -1.00078600 |
| C | 3.47797200  | -2.41310600 | -1.38370000 |
| C | 4.10964600  | -3.60055200 | -1.18021900 |
| O | -0.41574800 | -4.52409400 | -0.71164800 |

|   |             |             |             |
|---|-------------|-------------|-------------|
| C | -0.75789800 | -6.69664800 | -0.42945400 |
| C | 3.22983500  | -4.66857800 | -0.96269100 |
| S | 2.53052600  | -0.35013500 | 1.93332100  |
| S | -0.27394700 | 3.73366100  | 0.95729800  |
| S | -4.70551000 | 1.45962100  | 0.16626400  |
| S | -3.13413600 | -3.36535300 | -0.37049700 |
| S | 1.76953000  | -2.62027700 | -1.31416100 |
| C | 4.06887600  | -1.12881500 | -1.56756300 |
| C | 5.34978500  | -0.66951800 | -1.57737100 |
| O | 3.21186500  | -0.10170400 | -1.73463900 |
| C | 5.26611800  | 0.73063300  | -1.74907700 |
| C | 3.94235000  | 1.02454600  | -1.84390500 |
| C | 3.21364000  | 2.23938500  | -2.02408500 |
| C | 3.70493800  | 3.50405500  | -2.01012200 |
| S | 1.51232400  | 2.26803400  | -2.28333300 |
| C | 2.71796400  | 4.49073100  | -2.20182300 |
| C | 1.48229000  | 3.97597000  | -2.37030400 |
| H | 0.56225100  | 4.51189700  | -2.51055500 |
| F | 3.01312300  | 5.77759500  | -2.17793000 |
| F | 4.97664900  | 3.79937700  | -1.80157900 |
| F | 5.42331500  | -3.74322300 | -1.16262100 |
| F | 3.65092500  | -5.89578800 | -0.71159000 |
| F | -3.80167200 | -7.13246600 | -0.29455300 |
| F | -6.19231300 | -5.65057800 | -0.12122200 |
| F | -8.52345400 | 1.49567400  | -0.06147400 |
| F | -7.46962300 | 4.10589800  | 0.13950200  |
| F | -0.71787400 | 7.49184000  | 0.39753100  |
| F | 2.00435700  | 6.79881400  | 0.73638600  |
| F | 6.18701900  | 0.54559600  | 1.25922600  |
| F | 5.86878900  | -2.21008700 | 1.75323700  |
| H | 6.07076500  | 1.43984900  | -1.79456000 |
| H | 6.23331400  | -1.26704400 | -1.45338600 |
| H | 1.40537800  | -7.21477300 | -0.63086200 |
| H | -1.26004400 | -7.63065100 | -0.26696700 |
| H | -7.78169400 | -3.63551900 | -0.21603100 |
| H | -8.62015600 | -1.04847400 | -0.06256400 |
| H | -5.71779100 | 6.01019600  | 0.18933300  |
| H | -3.29273400 | 7.23660800  | 0.45227500  |
| H | 4.10927300  | 5.31584600  | 0.95964100  |
| H | 5.62411100  | 3.06870500  | 1.29087200  |
| H | 4.72894800  | -4.43413200 | 2.37964600  |
| H | 2.72236900  | -6.25058700 | 2.74071200  |

T2SO-1

0 1

|   |             |             |             |
|---|-------------|-------------|-------------|
| C | 3.22400500  | -0.94251300 | -0.01791200 |
| C | 3.56642000  | 0.36126400  | 0.01496700  |
| O | 1.88856000  | -1.08135300 | -0.02606400 |
| C | 2.34710800  | 1.08414100  | 0.02804600  |
| C | 1.35836400  | 0.15546600  | 0.00197200  |
| H | 2.22136800  | 2.15117200  | 0.05523900  |
| C | -0.07336300 | 0.25411600  | -0.00105700 |
| C | -0.99331700 | -0.74471600 | 0.00484700  |
| S | -0.86874000 | 1.78300600  | -0.01185600 |
| C | -2.32700500 | -0.27765900 | 0.00203100  |
| C | -2.42294400 | 1.06598900  | -0.00565000 |
| H | -3.31554800 | 1.66207600  | -0.00897100 |

|   |             |             |             |
|---|-------------|-------------|-------------|
| F | -0.71357900 | -2.03248800 | 0.01425600  |
| H | 4.56230100  | 0.76264000  | 0.02867100  |
| F | -3.34639000 | -1.11583400 | 0.00766700  |
| H | 3.78736700  | -1.85479200 | -0.03748900 |

# T2SO-2

0 1

|   |             |             |             |
|---|-------------|-------------|-------------|
| C | -4.87523900 | -0.08538600 | 0.00014600  |
| C | -5.73866800 | -1.13350700 | -0.00064700 |
| C | -7.03953400 | -0.57036400 | 0.00022500  |
| C | -6.86461700 | 0.76724300  | 0.00126800  |
| O | -5.55889600 | 1.07428900  | 0.00127300  |
| H | -5.47962000 | -2.17652000 | -0.00172100 |
| C | -3.44607800 | 0.00654800  | -0.00007500 |
| C | -2.66942300 | 1.12119700  | -0.00052000 |
| C | -1.28792300 | 0.84962200  | -0.00061400 |
| C | -0.99320000 | -0.47751300 | -0.00023900 |
| F | -3.12447500 | 2.35699000  | -0.00087000 |
| C | 0.28824100  | -1.11117900 | -0.00022300 |
| C | 0.67601200  | -2.41479300 | -0.00032900 |
| O | 1.37023500  | -0.31007200 | -0.00009400 |
| C | 2.08580800  | -2.40711200 | -0.00020300 |
| C | 2.45989100  | -1.10024200 | -0.00007100 |
| H | 2.74061000  | -3.25912500 | -0.00024600 |
| C | 3.73725200  | -0.45279500 | 0.00007900  |
| C | 4.01489500  | 0.87796300  | 0.00011300  |
| C | 5.39892600  | 1.15932300  | 0.00030600  |
| C | 6.16986500  | 0.05410900  | 0.00042800  |
| F | 3.11701300  | 1.83999500  | -0.00001300 |
| S | -2.45117800 | -1.40217100 | 0.00014400  |
| S | 5.20463100  | -1.35841900 | 0.00025900  |
| H | 0.03037500  | -3.27378400 | -0.00050800 |
| H | -7.97679200 | -1.09435600 | -0.00000300 |
| F | 5.84539100  | 2.40051100  | 0.00037100  |
| F | -0.40016400 | 1.82031200  | -0.00103800 |
| H | -7.53950900 | 1.60062100  | 0.00210300  |
| H | 7.24187300  | -0.00007700 | 0.00058100  |

# T2SO-3

0 1

|   |              |             |             |
|---|--------------|-------------|-------------|
| C | -8.29462200  | 0.56362200  | 0.00528100  |
| C | -9.31840300  | -0.32841300 | 0.02427800  |
| C | -10.50919100 | 0.43997700  | 0.01874200  |
| C | -10.11732200 | 1.73061600  | -0.00287700 |
| O | -8.77862300  | 1.81945400  | -0.01131500 |
| H | -9.23356900  | -1.39967100 | 0.04087400  |
| C | -6.87032300  | 0.41359900  | 0.00054100  |
| C | -5.91248200  | 1.37713100  | -0.00751100 |
| C | -4.59905000  | 0.87036100  | -0.00865000 |
| C | -4.53866200  | -0.48787800 | -0.00135100 |
| F | -6.14506900  | 2.67297600  | -0.01326500 |
| C | -3.37888100  | -1.32249000 | -0.00005300 |
| C | -3.19913000  | -2.67102100 | 0.00322100  |
| O | -2.18513200  | -0.70052200 | -0.00223300 |
| C | -1.80561700  | -2.88367300 | 0.00309000  |
| C | -1.23142800  | -1.65030400 | -0.00032300 |
| H | -1.29242200  | -3.82779600 | 0.00527500  |

|   |              |             |             |
|---|--------------|-------------|-------------|
| C | 0.12633200   | -1.20578400 | -0.00184500 |
| C | 0.60100400   | 0.06863400  | -0.00335400 |
| C | 2.00607500   | 0.14791300  | -0.00414800 |
| C | 2.62183100   | -1.06440400 | -0.00320900 |
| C | 4.02049500   | -1.35629700 | -0.00376500 |
| C | 4.72431800   | -2.52014800 | -0.00661200 |
| O | 4.86560000   | -0.30850000 | -0.00086800 |
| C | 6.08710400   | -2.15682600 | -0.00524400 |
| C | 6.11867400   | -0.79785100 | -0.00179800 |
| H | 6.93551800   | -2.81625400 | -0.00657100 |
| C | 7.19017800   | 0.15159500  | 0.00089800  |
| C | 7.11948100   | 1.50882000  | 0.00750400  |
| C | 8.38624000   | 2.13344400  | 0.00874400  |
| C | 9.41305200   | 1.26045900  | 0.00316800  |
| F | -0.14843100  | 1.14938000  | -0.00403700 |
| F | 6.00452800   | 2.20803400  | 0.01260900  |
| S | -6.13375800  | -1.14694600 | 0.00630800  |
| S | 1.44113800   | -2.32392800 | -0.00126300 |
| S | 8.83895900   | -0.35157100 | -0.00398700 |
| H | 4.31700100   | -3.51450400 | -0.00945900 |
| H | -3.97055900  | -3.41897100 | 0.00531200  |
| H | -11.51962200 | 0.07673900  | 0.02962700  |
| F | 8.50245300   | 3.44717900  | 0.01493100  |
| F | 2.62500700   | 1.30826400  | -0.00579000 |
| F | -3.55492400  | 1.67031300  | -0.01596400 |
| H | -10.64619600 | 2.66342800  | -0.01412000 |
| H | 10.46355600  | 1.48089000  | 0.00275900  |

T2SO-4

0 1

|   |              |             |             |
|---|--------------|-------------|-------------|
| C | -11.37133400 | 1.70903100  | 0.07119100  |
| C | -12.53803500 | 1.05221800  | 0.29817700  |
| C | -13.56030100 | 2.03139000  | 0.22544800  |
| C | -12.93759700 | 3.19864800  | -0.03819600 |
| O | -11.61192900 | 3.01729100  | -0.13447000 |
| H | -12.65359300 | 0.00192100  | 0.49451900  |
| C | -10.00471800 | 1.28506200  | 0.01625100  |
| C | -8.89230800  | 2.03542800  | -0.19610900 |
| C | -7.69654400  | 1.29267800  | -0.18297600 |
| C | -7.88199100  | -0.03547800 | 0.04029600  |
| F | -8.88774100  | 3.33632800  | -0.39941000 |
| C | -6.90141000  | -1.07202900 | 0.11797700  |
| C | -6.98572600  | -2.41964100 | 0.28569900  |
| O | -5.61137200  | -0.70243200 | 0.01252800  |
| C | -5.66132900  | -2.90150600 | 0.28331700  |
| C | -4.86035500  | -1.81507800 | 0.11334000  |
| H | -5.34029300  | -3.92095200 | 0.39482600  |
| C | -3.44328000  | -1.65226600 | 0.03245600  |
| C | -2.72681700  | -0.50348300 | -0.09877900 |
| C | -1.33523100  | -0.70756700 | -0.13806800 |
| C | -0.97166800  | -2.01413700 | -0.03695900 |
| C | 0.34359400   | -2.57151700 | -0.04183200 |
| C | 0.81494800   | -3.84777400 | -0.03118300 |
| O | 1.37146300   | -1.70284900 | -0.05668900 |
| C | 2.22142000   | -3.74907900 | -0.03844200 |
| C | 2.51029600   | -2.41947800 | -0.05463500 |
| H | 2.92905900   | -4.55769600 | -0.03232900 |



|   |              |             |             |
|---|--------------|-------------|-------------|
| C | 3.73778400   | -1.68853400 | -0.06387200 |
| C | 3.92375700   | -0.34154300 | -0.04582000 |
| C | 5.27746100   | 0.04203300  | -0.05294100 |
| C | 6.14205000   | -1.00718800 | -0.07584600 |
| F | -3.24582500  | 0.70166300  | -0.18382600 |
| F | 2.95902900   | 0.55152200  | -0.02241500 |
| S | -9.56465000  | -0.36834600 | 0.23754000  |
| S | -2.37578600  | -3.00655200 | 0.11148600  |
| S | 5.26526300   | -2.49350600 | -0.08850800 |
| C | 7.57077400   | -0.97695600 | -0.08882800 |
| C | 8.52457500   | -1.94371800 | -0.16282000 |
| O | 8.15165600   | 0.23474900  | -0.01230000 |
| C | 9.76690100   | -1.27613500 | -0.12745200 |
| C | 9.48405400   | 0.05027800  | -0.03589800 |
| H | 10.74443600  | -1.72065900 | -0.16434400 |
| C | 10.29630600  | 1.22730600  | 0.03758200  |
| C | 9.88989900   | 2.51848300  | 0.16513900  |
| S | 12.01721900  | 1.15546000  | -0.02769000 |
| C | 10.96070600  | 3.43805100  | 0.21074700  |
| C | 12.17148600  | 2.85327400  | 0.11925900  |
| H | 13.13364400  | 3.32894100  | 0.12940800  |
| F | 8.63678600   | 2.91232900  | 0.24417400  |
| H | 8.35755700   | -3.00273300 | -0.23571100 |
| H | 0.22675700   | -4.74702600 | -0.02312200 |
| H | -7.88676200  | -2.99469000 | 0.39552900  |
| H | -14.61598200 | 1.88252200  | 0.35344100  |
| F | 10.74759800  | 4.73379900  | 0.33308900  |
| F | 5.63176000   | 1.30836500  | -0.03953800 |
| F | -0.49890100  | 0.29934300  | -0.26433900 |
| F | -6.53030100  | 1.86937700  | -0.37517800 |
| H | -13.28195300 | 4.20422700  | -0.18038200 |

T2SO-5

0 1

|   |              |             |             |
|---|--------------|-------------|-------------|
| C | -13.95294900 | 3.30462100  | -0.05233300 |
| C | -15.24205500 | 2.89375000  | 0.06531400  |
| C | -16.03653700 | 4.06435700  | -0.02099900 |
| C | -15.17251600 | 5.08762000  | -0.18236500 |
| O | -13.90770500 | 4.64136800  | -0.20350600 |
| H | -15.58142900 | 1.88291000  | 0.19987200  |
| C | -12.70198700 | 2.60775000  | -0.04519500 |
| C | -11.44446500 | 3.11685800  | -0.11799200 |
| C | -10.43369300 | 2.13790400  | -0.07963000 |
| C | -10.90806400 | 0.86798200  | 0.02339700  |
| F | -11.15193400 | 4.39708700  | -0.21268900 |
| C | -10.16869300 | -0.35304000 | 0.08852400  |
| C | -10.53362200 | -1.65958500 | 0.19458900  |
| O | -8.82724900  | -0.25416100 | 0.03930700  |
| C | -9.33643800  | -2.40373600 | 0.21131300  |
| C | -8.32406600  | -1.50010300 | 0.11412300  |
| H | -9.23576000  | -3.47086500 | 0.28769500  |
| C | -6.90138400  | -1.62610300 | 0.08070100  |
| C | -5.96553400  | -0.64121600 | 0.01315700  |
| C | -4.64251800  | -1.11966500 | 0.00163400  |
| C | -4.55157500  | -2.47561000 | 0.06037800  |
| C | -3.37312800  | -3.28297000 | 0.06515000  |
| C | -3.16097100  | -4.62660400 | 0.09518700  |

|   |              |             |             |
|---|--------------|-------------|-------------|
| O | -2.19479900  | -2.63347900 | 0.03388900  |
| C | -1.76263200  | -4.80606200 | 0.08182500  |
| C | -1.21852700  | -3.55943700 | 0.04391000  |
| H | -1.22715200  | -5.73756000 | 0.09911000  |
| C | 0.12693700   | -3.08022600 | 0.01488200  |
| C | 0.56588100   | -1.79300100 | 0.00847600  |
| C | 1.96774200   | -1.67471700 | -0.02073200 |
| C | 2.61638600   | -2.86994500 | -0.03659200 |
| F | -6.22979500  | 0.64577600  | -0.03697500 |
| F | -0.21305600  | -0.73372200 | 0.02743500  |
| S | -12.63351000 | 0.88760500  | 0.06923800  |
| S | -6.13026600  | -3.16973300 | 0.12996000  |
| S | 1.47124000   | -4.16186200 | -0.01449000 |
| C | 4.02174900   | -3.12377000 | -0.07066000 |
| C | 4.75467200   | -4.26876100 | -0.12870000 |
| O | 4.84037400   | -2.05552900 | -0.04223400 |
| C | 6.10709400   | -3.87189300 | -0.13497100 |
| C | 6.10550000   | -2.51247300 | -0.08155900 |
| H | 6.97134800   | -4.50935700 | -0.17289000 |
| C | 7.15179000   | -1.54016700 | -0.06143100 |
| C | 7.05534900   | -0.18697700 | 0.03331800  |
| S | 8.81080600   | -2.00684600 | -0.16079800 |
| C | 8.29997900   | 0.46986900  | 0.02822600  |
| C | 9.36183900   | -0.37406800 | -0.07001600 |
| F | 5.92768900   | 0.48303800  | 0.12551700  |
| H | 4.37192100   | -5.27222400 | -0.16407400 |
| H | -3.91378400  | -5.39282700 | 0.12251300  |
| H | -11.53669000 | -2.04026800 | 0.25429100  |
| H | -17.10692900 | 4.13138300  | 0.03176600  |
| F | 8.38560600   | 1.77930000  | 0.11396400  |
| F | 2.55539100   | -0.49868700 | -0.03251900 |
| F | -3.61747300  | -0.29865800 | -0.06156800 |
| F | -9.16094500  | 2.46450700  | -0.13819800 |
| H | -15.29464000 | 6.14730300  | -0.29252700 |
| C | 10.75394000  | -0.05298800 | -0.10228700 |
| C | 11.87975400  | -0.80994900 | -0.19719700 |
| O | 11.08209200  | 1.25036400  | -0.02570400 |
| C | 12.96416500  | 0.09118600  | -0.17584900 |
| H | 11.92570500  | -1.88095400 | -0.27203200 |
| C | 12.42442900  | 1.33438700  | -0.07033800 |
| H | 14.01007800  | -0.14920400 | -0.22938300 |
| C | 12.99578500  | 2.64565900  | -0.00265200 |
| C | 12.35926600  | 3.83669600  | 0.15348600  |
| S | 14.69721300  | 2.89924100  | -0.11830700 |
| C | 13.23989600  | 4.94057900  | 0.18092400  |
| C | 14.53532000  | 4.59448400  | 0.04725700  |
| H | 15.39119000  | 5.24223100  | 0.03669000  |
| F | 11.05802200  | 3.98959000  | 0.27377600  |
| F | 12.79093900  | 6.17206200  | 0.32677700  |

T2SO-6

0 1

|   |              |             |            |
|---|--------------|-------------|------------|
| C | -11.33734500 | -0.62713700 | 0.28521100 |
| C | -12.50276700 | -1.28337600 | 0.53425600 |
| C | -13.52090500 | -0.30905200 | 0.49435400 |
| C | -12.90565200 | 0.87418300  | 0.22412000 |
| O | -11.57980100 | 0.68316000  | 0.09609000 |

|   |              |             |             |
|---|--------------|-------------|-------------|
| H | -12.61669200 | -2.33493300 | 0.72394200  |
| C | -9.97640500  | -1.05164500 | 0.19652700  |
| C | -8.86923000  | -0.29855700 | -0.04197000 |
| C | -7.67400800  | -1.04068400 | -0.05765000 |
| C | -7.85342600  | -2.36980300 | 0.16894000  |
| F | -8.87232300  | 1.00089800  | -0.24367000 |
| C | -6.86968100  | -3.40422900 | 0.22372900  |
| C | -6.94734000  | -4.75274300 | 0.38876300  |
| O | -5.58275100  | -3.03100100 | 0.09583600  |
| C | -5.62208900  | -5.23098300 | 0.36078600  |
| C | -4.82711000  | -4.14165800 | 0.17965400  |
| H | -5.29634900  | -6.24987700 | 0.46315500  |
| C | -3.41221200  | -3.97383500 | 0.07477300  |
| C | -2.70299000  | -2.82186000 | -0.06805900 |
| C | -1.31146100  | -3.01972500 | -0.12974200 |
| C | -0.94045100  | -4.32475300 | -0.03451000 |
| C | 0.37799300   | -4.87406300 | -0.05932800 |
| C | 0.85967200   | -6.14656500 | -0.05563000 |
| O | 1.39863500   | -3.99756900 | -0.08911600 |
| C | 2.26525300   | -6.03665600 | -0.08349600 |
| C | 2.54311700   | -4.70475700 | -0.10371300 |
| H | 2.97938700   | -6.83954200 | -0.08817500 |
| C | 3.76198100   | -3.96023100 | -0.12995500 |
| C | 3.92825800   | -2.61035800 | -0.12128900 |
| C | 5.27564100   | -2.20694900 | -0.14450000 |
| C | 6.15553600   | -3.24385700 | -0.17059900 |
| F | -3.22794700  | -1.61899600 | -0.14462200 |
| F | 2.95120800   | -1.73116600 | -0.09296700 |
| S | -9.53010300  | -2.70567200 | 0.40644800  |
| S | -2.33752500  | -5.32353000 | 0.13631000  |
| S | 5.30050900   | -4.74318900 | -0.16584900 |
| C | 7.58301400   | -3.19025200 | -0.19739200 |
| C | 8.55361500   | -4.14088000 | -0.27217900 |
| O | 8.14291800   | -1.96810200 | -0.13648000 |
| C | 9.78374600   | -3.45216100 | -0.25464000 |
| C | 9.47870100   | -2.12882900 | -0.17122800 |
| H | 10.76843600  | -3.87998200 | -0.29850500 |
| C | 10.26712100  | -0.93869100 | -0.11449200 |
| C | 9.83778300   | 0.34877200  | -0.02098900 |
| S | 11.99184000  | -0.98266000 | -0.15715100 |
| C | 10.88191200  | 1.29105700  | 0.01711300  |
| C | 12.12132600  | 0.73519600  | -0.04687100 |
| F | 8.57735100   | 0.71947000  | 0.03287200  |
| H | 8.40428800   | -5.20318700 | -0.33456800 |
| H | 0.27896100   | -7.05054200 | -0.03903500 |
| H | -7.84469900  | -5.33063800 | 0.51298100  |
| H | -14.57366600 | -0.46236600 | 0.64544300  |
| F | 10.63683900  | 2.57970000  | 0.10791900  |
| F | 5.61118200   | -0.93579200 | -0.14159100 |
| F | -0.48235700  | -2.00878000 | -0.26921000 |
| F | -6.51290200  | -0.46434600 | -0.27706100 |
| C | 13.39460100  | 1.38398100  | -0.03104600 |
| C | 14.67197500  | 0.91962400  | -0.08267000 |
| O | 13.39765800  | 2.72691500  | 0.05236700  |
| C | 15.50711600  | 2.05478200  | -0.02692400 |
| H | 14.97666600  | -0.10856800 | -0.15167500 |
| C | 14.68092900  | 3.13151700  | 0.05485800  |

|   |              |            |             |
|---|--------------|------------|-------------|
| H | 16.58132100  | 2.07251400 | -0.04498600 |
| C | 14.91767100  | 4.54123100 | 0.13838600  |
| C | 14.00793800  | 5.54829900 | 0.21389600  |
| S | 16.51494100  | 5.19093900 | 0.15311200  |
| C | 14.59743200  | 6.82971600 | 0.28262000  |
| C | 15.94459500  | 6.80083600 | 0.25951500  |
| H | 16.62142000  | 7.63296600 | 0.29977200  |
| F | 12.70161400  | 5.39162700 | 0.22422600  |
| F | 13.85918700  | 7.91973700 | 0.36072900  |
| C | -13.38708000 | 2.20956700 | 0.06186800  |
| C | -12.68281200 | 3.33505400 | -0.22965200 |
| S | -15.06191200 | 2.59234500 | 0.23160100  |
| C | -13.47891200 | 4.49279900 | -0.31703600 |
| C | -14.79965400 | 4.26653000 | -0.09299500 |
| C | -15.88319300 | 5.20303100 | -0.09952900 |
| C | -17.21898600 | 5.07546700 | 0.11083500  |
| O | -15.57936300 | 6.48858700 | -0.35993900 |
| C | -17.76506400 | 6.37528000 | -0.03214900 |
| H | -17.74709500 | 4.16771900 | 0.33918700  |
| C | -16.72470300 | 7.18537900 | -0.31615000 |
| H | -18.79475000 | 6.66407300 | 0.06447700  |
| H | -16.63773800 | 8.23716300 | -0.50637500 |
| F | -11.38223500 | 3.38195300 | -0.41998100 |
| F | -12.95101200 | 5.66674700 | -0.59332900 |
