# Supplementary material for: Folding oligomers of difluorinated thienylfurans: a DFT study
Source: Royal Society of Chemistry journal article supplement (doi:10.1039/b916415d), 2009-11-18
Supplement: b916415d.zip [file b916415d.zip]

Cartesian coordinates of MPWB1K/6-31G(d) optimized geometries  
all-cisoid CFOFS-n, and all-transoid TFOFS-n, n = 1-6.  
Charge and multiplicity are given first.

CFOFS-1

|     |             |             |             |
|-----|-------------|-------------|-------------|
| 0 1 |             |             |             |
| C   | 3.09762500  | -0.98910400 | 0.00040200  |
| C   | 1.10958600  | -0.10165100 | 0.00010200  |
| C   | -0.32060800 | -0.12718800 | -0.00004000 |
| C   | -2.68770500 | -0.81549800 | -0.00014200 |
| C   | 2.01543800  | 0.90634300  | 0.00012200  |
| C   | 3.30951800  | 0.34396800  | 0.00032500  |
| C   | -1.16509100 | 0.94263900  | -0.00030000 |
| C   | -2.50909400 | 0.52424200  | -0.00034800 |
| O   | 1.78651400  | -1.26884700 | 0.00027600  |
| H   | 4.24867300  | 0.86299300  | 0.00039600  |
| H   | -0.84833400 | 1.97078200  | -0.00044900 |
| F   | 1.72134300  | 2.19423200  | -0.00001900 |
| F   | -3.50794300 | 1.39432700  | -0.00059300 |
| S   | -1.17838300 | -1.61820800 | 0.00013900  |
| H   | 3.75751600  | -1.83408600 | 0.00054200  |
| H   | -3.61446000 | -1.35711200 | -0.00014700 |

CFOFS-2

|     |             |             |             |
|-----|-------------|-------------|-------------|
| 0 1 |             |             |             |
| C   | -5.28000600 | -2.70930800 | -0.00036600 |
| C   | -4.29587400 | -0.76797000 | -0.00009500 |
| C   | -3.17306700 | 0.11311600  | 0.00003400  |
| C   | -0.89842500 | 1.07342600  | 0.00006000  |
| C   | 0.50645400  | 1.31696400  | 0.00002000  |
| C   | 2.59597800  | 0.66666100  | -0.00014800 |
| C   | -5.63549900 | -0.55628200 | -0.00019600 |
| C   | -6.28508900 | -1.80766400 | -0.00038800 |
| C   | -3.19703100 | 1.47927500  | 0.00034800  |
| C   | -1.89882500 | 1.99946700  | 0.00035300  |
| C   | 2.57760300  | 2.02395200  | -0.00006400 |
| C   | 1.24362300  | 2.46189100  | 0.00001700  |
| O   | -4.08537900 | -2.10064900 | -0.00020800 |
| O   | 1.31371400  | 0.23840400  | -0.00009300 |
| H   | -7.34127800 | -1.99689700 | -0.00050900 |
| H   | -4.09255700 | 2.07555500  | 0.00057200  |
| H   | 0.87707800  | 3.46961800  | 0.00008500  |
| C   | 3.65215100  | -0.29282300 | -0.00009900 |
| C   | 4.98383000  | -2.36771400 | 0.00076300  |
| C   | 5.73038000  | -1.24034700 | -0.00047700 |
| C   | 4.99359200  | -0.04192800 | -0.00099900 |
| H   | 5.43019700  | 0.94115600  | -0.00197800 |
| F   | -6.21683100 | 0.62905600  | -0.00013800 |
| F   | -1.65254900 | 3.30221200  | 0.00063700  |
| F   | 3.65002600  | 2.79381900  | -0.00008600 |
| F   | 7.05497900  | -1.24245000 | -0.00121100 |
| S   | -1.56949700 | -0.51116400 | -0.00026800 |
| S   | 3.31912300  | -1.98091400 | 0.00139500  |
| H   | -5.25980800 | -3.78122200 | -0.00045700 |
| H   | 5.32628400  | -3.38503600 | 0.00127800  |

CFOFS-3

0 1

|   |             |             |             |
|---|-------------|-------------|-------------|
| C | -4.87588500 | 4.69924300  | 0.00239900  |
| C | -5.40162800 | 2.58759500  | 0.00056200  |
| C | -5.12560700 | 1.18758200  | 0.00042800  |
| C | -4.02614400 | -1.02197000 | -0.00031100 |
| C | -3.11604800 | -2.11821900 | -0.00034200 |
| C | -1.10208400 | -2.97356600 | -0.00002900 |
| C | -6.55384300 | 3.30384300  | -0.00221900 |
| C | -6.22603600 | 4.67520200  | -0.00095400 |
| C | -6.03418100 | 0.16672100  | 0.00056500  |
| C | -5.38886000 | -1.07346900 | 0.00007400  |
| C | -1.99527000 | -3.99817200 | 0.00005300  |
| C | -3.29454700 | -3.46948600 | -0.00018800 |
| O | -4.37076200 | 3.45808400  | 0.00337900  |
| O | -1.80349600 | -1.81784700 | -0.00032300 |
| H | -6.90077600 | 5.50949700  | -0.00238800 |
| H | -7.10191700 | 0.29670200  | 0.00094000  |
| H | -4.22706800 | -3.99876200 | -0.00012000 |
| C | 0.31954900  | -2.92015500 | 0.00005600  |
| C | 2.67547400  | -2.17832700 | 0.00015100  |
| C | 2.51257500  | -3.53231900 | 0.00060100  |
| C | 3.89933400  | -1.44816300 | -0.00021100 |
| C | 5.04966200  | 0.41416200  | -0.00061200 |
| C | 5.92628000  | -0.62213400 | -0.00109400 |
| O | 3.80141700  | -0.10397500 | -0.00003300 |
| C | 5.20757500  | -1.82800700 | -0.00105600 |
| C | 1.18772600  | -3.97739600 | 0.00059600  |
| H | 5.59308600  | -2.82857800 | -0.00147400 |
| H | 0.89067100  | -5.01138800 | 0.00092800  |
| F | -7.76864900 | 2.78744000  | -0.00542200 |
| F | -6.04910100 | -2.22296100 | 0.00017100  |
| F | -1.67143900 | -5.27707900 | 0.00034900  |
| F | 3.54498700  | -4.36374200 | 0.00094100  |
| F | 7.24035400  | -0.49642200 | -0.00168400 |
| C | 5.21477700  | 1.83106800  | -0.00013500 |
| C | 4.84380100  | 4.26784800  | 0.00344500  |
| C | 6.14888100  | 3.91500100  | -0.00180700 |
| C | 6.38804200  | 2.52820500  | -0.00392900 |
| H | 7.36442100  | 2.07590400  | -0.00808000 |
| F | 7.14155400  | 4.79217700  | -0.00495000 |
| S | -3.50231600 | 0.61717500  | -0.00009200 |
| S | 1.13753100  | -1.40501300 | -0.00015500 |
| S | 3.84938500  | 2.87824000  | 0.00618600  |
| H | -4.15942600 | 5.49681400  | 0.00446900  |
| H | 4.42952400  | 5.25805500  | 0.00561100  |

CFOFS-4

0 1

|   |            |             |             |
|---|------------|-------------|-------------|
| C | 2.13026700 | 5.58103200  | -0.84019400 |
| C | 3.89984200 | 4.37122000  | -0.46557700 |
| C | 4.61130500 | 3.15200600  | -0.25474000 |
| C | 5.24108700 | 0.78279600  | 0.03823800  |
| C | 5.28476600 | -0.63632500 | 0.15657100  |
| C | 4.34509100 | -2.61205400 | 0.20352100  |
| C | 4.28901900 | 5.66956600  | -0.53237800 |
| C | 3.14993000 | 6.46413100  | -0.77427700 |
| C | 5.95362900 | 3.00349100  | -0.04636600 |

|   |             |             |             |
|---|-------------|-------------|-------------|
| C | 6.28625300  | 1.65537500  | 0.11548000  |
| C | 5.68532800  | -2.77920900 | 0.35576300  |
| C | 6.30666000  | -1.52205500 | 0.32882100  |
| O | 2.56501300  | 4.32674700  | -0.65676000 |
| O | 4.10811100  | -1.28664000 | 0.08200900  |
| H | 3.10661700  | 7.53079000  | -0.88261300 |
| H | 6.66229900  | 3.81161100  | -0.01194900 |
| H | 7.35103000  | -1.29801300 | 0.42057300  |
| C | 3.24797200  | -3.51613100 | 0.15819700  |
| C | 0.99409400  | -4.51844900 | 0.04862100  |
| C | 2.00909300  | -5.42609300 | 0.13563200  |
| C | -0.40187000 | -4.78523300 | -0.03693000 |
| C | -2.49723400 | -4.16525600 | -0.15313900 |
| C | -2.45741500 | -5.52375700 | -0.17810400 |
| O | -1.22404100 | -3.71895800 | -0.06590800 |
| C | -1.12071000 | -5.94162600 | -0.10341100 |
| C | 3.29464800  | -4.88334900 | 0.20021500  |
| H | -0.73855400 | -6.94339000 | -0.10111200 |
| H | 4.19754600  | -5.46379200 | 0.27018900  |
| F | 5.52915300  | 6.09924900  | -0.39252800 |
| F | 7.52919000  | 1.24872900  | 0.32884500  |
| F | 6.28516000  | -3.94439300 | 0.50386800  |
| F | 1.78368600  | -6.73215900 | 0.15357800  |
| F | -3.51658000 | -6.30612800 | -0.25952800 |
| C | -3.56157500 | -3.22228900 | -0.19315700 |
| C | -4.92050800 | -1.15884000 | -0.18302200 |
| C | -5.64320100 | -2.30785800 | -0.31747800 |
| C | -4.89709900 | -3.48882300 | -0.32495100 |
| H | -5.31833800 | -4.47373800 | -0.42062100 |
| F | -6.96382200 | -2.29921100 | -0.43222900 |
| C | -5.41713100 | 0.17627700  | -0.13976900 |
| C | -5.17332700 | 2.33869300  | 0.09507100  |
| C | -6.48733400 | 2.08546900  | -0.13378000 |
| C | -4.44016800 | 3.53722600  | 0.34280600  |
| C | -2.68587600 | 5.18634900  | 0.87365000  |
| C | -3.90029200 | 5.73569800  | 0.64543000  |
| O | -4.51994900 | 1.15479400  | 0.08885900  |
| C | -6.66515500 | 0.70172900  | -0.28785400 |
| C | -4.91933600 | 4.81516200  | 0.33979700  |
| H | -5.94019800 | 5.08396200  | 0.13263000  |
| H | -7.57497200 | 0.16770800  | -0.47964100 |
| F | -7.43257900 | 3.00446600  | -0.19575900 |
| F | -4.13274800 | 7.03881800  | 0.69967200  |
| S | 3.77924300  | 1.64600400  | -0.24772700 |
| S | 1.63644400  | -2.92172100 | 0.04456800  |
| S | -3.24507900 | -1.53477700 | -0.06100900 |
| S | -2.76186100 | 3.48539200  | 0.71891600  |
| H | -1.77312900 | 5.68967200  | 1.13033600  |
| H | 1.07701000  | 5.69167900  | -1.00877200 |

CFOFS-5

0 1

|   |             |             |             |
|---|-------------|-------------|-------------|
| C | -3.79892900 | -2.49644600 | 1.26612600  |
| C | -2.26502600 | -4.31149200 | 0.60154700  |
| C | -1.13714700 | -5.12360700 | 0.28731200  |
| C | 1.01142900  | -5.41326100 | -0.02384400 |
| C | 2.36308700  | -4.97795500 | -0.10955000 |

|   |             |             |             |
|---|-------------|-------------|-------------|
| C | 4.41610400  | -3.60621100 | -0.18317700 |
| C | 5.38837000  | -2.56592000 | -0.17472100 |
| C | 5.98293600  | -0.46125000 | -0.08116900 |
| C | -4.26922700 | 0.79542100  | 2.41717800  |
| C | -5.58324100 | 0.54568400  | 2.22790900  |
| C | -5.62299000 | -0.77652700 | 1.74119200  |
| C | -4.35283500 | -1.24646400 | 1.67243600  |
| C | 0.39135400  | -6.60660800 | -0.22228500 |
| C | -0.98820200 | -6.44115300 | -0.02726000 |
| C | -3.58629300 | -4.64551600 | 0.54447700  |
| C | -4.47566600 | -3.63064600 | 0.91423000  |
| C | 3.47923400  | -5.74037300 | -0.32097700 |
| C | 4.62630400  | -4.94329500 | -0.35744600 |
| C | 7.11028100  | -1.21455400 | -0.18599700 |
| C | 6.74969500  | -2.56809000 | -0.24714800 |
| O | 0.05930500  | -4.50545400 | 0.28990200  |
| O | 4.92598900  | -1.30503300 | -0.07550800 |
| O | -3.52262200 | -0.26853100 | 2.09202000  |
| H | -6.41061000 | 1.20838000  | 2.39431800  |
| H | -5.54701200 | -3.72630000 | 0.91272400  |
| H | -1.75760800 | -7.18373500 | -0.10276300 |
| H | 3.48079600  | -6.80890600 | -0.44182000 |
| H | 7.39515800  | -3.42004900 | -0.32857000 |
| C | 5.75459500  | 0.94018300  | 0.00533500  |
| C | 4.73684000  | 3.18935000  | 0.12902800  |
| C | 6.10191900  | 3.18715800  | 0.13680200  |
| C | 3.87488000  | 4.32138800  | 0.19711100  |
| C | 1.90603500  | 5.27870400  | 0.18802700  |
| C | 2.84613600  | 6.24742600  | 0.35110500  |
| O | 2.55156800  | 4.09320500  | 0.09353200  |
| C | 4.11554100  | 5.65346200  | 0.35961600  |
| C | 6.70007000  | 1.92763500  | 0.06660500  |
| H | 5.06773800  | 6.13268600  | 0.47100400  |
| H | 7.76213400  | 1.76073100  | 0.06138600  |
| H | -3.73235900 | 1.65564800  | 2.76582900  |
| F | -6.69957900 | -1.44977200 | 1.38244800  |
| F | -3.99154700 | -5.84856700 | 0.16476400  |
| F | 1.00208100  | -7.72895500 | -0.54789100 |
| F | 5.83777500  | -5.44598100 | -0.54627900 |
| F | 8.33765500  | -0.73291000 | -0.22291500 |
| F | 6.80763100  | 4.30685500  | 0.20842800  |
| F | 2.58811700  | 7.53477100  | 0.47715000  |
| C | 0.48673400  | 5.31131700  | 0.09131100  |
| C | -1.89796100 | 4.74121800  | -0.22758700 |
| C | -1.66694800 | 6.05364400  | 0.06364700  |
| C | -0.32637700 | 6.40051300  | 0.24827400  |
| H | 0.01400300  | 7.39280800  | 0.48338100  |
| F | -2.65122600 | 6.93601500  | 0.16664000  |
| C | -3.15466000 | 4.11200900  | -0.46495800 |
| C | -4.39630700 | 2.38619400  | -0.99159900 |
| C | -5.21847100 | 3.44147000  | -0.76168200 |
| C | -4.62379100 | 1.02636400  | -1.35734800 |
| C | -4.35044500 | -1.35387000 | -1.93516600 |
| C | -5.64108300 | -0.95433900 | -1.86564000 |
| O | -3.12592000 | 2.80837000  | -0.80398400 |
| C | -4.44064400 | 4.56055900  | -0.42294300 |
| C | -5.82393500 | 0.40251900  | -1.54115200 |

|   |             |             |             |
|---|-------------|-------------|-------------|
| H | -6.78334800 | 0.87875300  | -1.44270800 |
| H | -4.77737000 | 5.55036300  | -0.18614900 |
| F | -6.53608500 | 3.40401800  | -0.84423000 |
| F | -6.66803700 | -1.76247400 | -2.08171900 |
| S | -2.09550700 | -2.68304600 | 1.13535300  |
| S | 2.73613800  | -3.30344800 | 0.03734900  |
| S | 4.15276300  | 1.57211100  | 0.03143500  |
| S | -0.40418600 | 3.88496300  | -0.27983900 |
| S | -3.30254900 | -0.05000100 | -1.59004800 |
| H | -3.97391300 | -2.33493800 | -2.15563800 |

CFOFS-6

0 1

|   |             |             |             |
|---|-------------|-------------|-------------|
| C | 3.97712400  | -0.81665000 | 1.97214900  |
| C | 4.09181000  | 1.61311800  | 1.56972100  |
| C | 3.82513900  | 2.98886800  | 1.31359100  |
| C | 2.47279200  | 4.65718500  | 0.90928700  |
| C | 1.20555500  | 5.24819600  | 0.65723100  |
| C | -1.19722000 | 5.64221800  | 0.23873600  |
| C | -2.60748100 | 5.56570100  | 0.05415800  |
| C | -4.51163400 | 4.49586700  | -0.08983200 |
| C | 2.11409400  | -3.69979400 | 2.76186000  |
| C | 3.24051600  | -4.36731900 | 2.42994900  |
| C | 4.15158100  | -3.35737400 | 2.06046800  |
| C | 3.53888900  | -2.15597500 | 2.19958700  |
| C | 3.74288300  | 5.14195500  | 0.92967600  |
| C | 4.62631600  | 4.08593800  | 1.19356700  |
| C | 5.30625700  | 0.99456500  | 1.60417000  |
| C | 5.26664300  | -0.38493500 | 1.83516900  |
| C | 0.93613500  | 6.57189400  | 0.44107300  |
| C | -0.42691600 | 6.76917400  | 0.20949200  |
| C | -4.75858200 | 5.82481100  | -0.24303300 |
| C | -3.55117100 | 6.52743200  | -0.15482800 |
| O | 2.53385100  | 3.32979700  | 1.15229300  |
| O | -3.17842500 | 4.34547600  | 0.09132600  |
| O | 2.27814200  | -2.37696400 | 2.62800500  |
| H | 3.40273200  | -5.42774600 | 2.43197500  |
| H | 6.13171000  | -1.02238200 | 1.89227700  |
| H | 5.69504400  | 4.11958300  | 1.27490200  |
| H | 1.67558300  | 7.35288300  | 0.44979300  |
| H | -3.39525500 | 7.58536000  | -0.22914000 |
| C | -5.36991300 | 3.36047500  | -0.08833700 |
| C | -6.34275200 | 1.08391600  | -0.03860400 |
| C | -7.25962000 | 2.09000400  | -0.14716200 |
| C | -6.62510800 | -0.31189600 | 0.02465000  |
| C | -6.08000800 | -2.43129100 | 0.09919100  |
| C | -7.43653000 | -2.34097300 | 0.13810600  |
| O | -5.58729500 | -1.17199500 | 0.02872300  |
| C | -7.80549300 | -0.99226600 | 0.09168500  |
| C | -6.73599500 | 3.38200000  | -0.17851300 |
| H | -8.79604900 | -0.58497500 | 0.10880900  |
| H | -7.33474700 | 4.27124400  | -0.25884900 |
| H | 1.14876300  | -4.02072100 | 3.10065700  |
| F | 5.38184500  | -3.53348700 | 1.61345200  |
| F | 6.43891400  | 1.65961000  | 1.42817400  |
| F | 4.06757900  | 6.40399400  | 0.73372500  |
| F | -0.94315400 | 7.96804000  | -0.02025300 |

|   |             |             |             |
|---|-------------|-------------|-------------|
| F | -5.94984800 | 6.35476100  | -0.44191000 |
| F | -8.56261900 | 1.85705600  | -0.21426900 |
| F | -8.26235000 | -3.36722200 | 0.20644300  |
| C | -5.20363800 | -3.55291800 | 0.09718800  |
| C | -3.26380500 | -5.08334600 | -0.03155900 |
| C | -4.46129400 | -5.70588800 | 0.16907600  |
| C | -5.57058500 | -4.86367800 | 0.24598500  |
| H | -6.57750600 | -5.20579400 | 0.40142800  |
| F | -4.56119700 | -7.02242600 | 0.28352000  |
| C | -1.98765300 | -5.70434300 | -0.15683900 |
| C | 0.17450400  | -5.67245000 | -0.50134700 |
| C | -0.20222800 | -6.96329700 | -0.30473600 |
| C | 1.42882700  | -5.05746300 | -0.76781400 |
| C | 3.23731500  | -3.43963100 | -1.21896000 |
| C | 3.65191700  | -4.73651200 | -1.15104400 |
| O | -0.93413300 | -4.90249100 | -0.40636400 |
| C | -1.58492800 | -7.00565600 | -0.08135900 |
| C | 2.64334400  | -5.67329800 | -0.90402600 |
| H | 2.80174000  | -6.73488400 | -0.83465300 |
| H | -2.19483100 | -7.86697000 | 0.10527800  |
| F | 0.61795300  | -7.99741600 | -0.32192700 |
| F | 4.92327600  | -5.07738300 | -1.30702300 |
| S | 2.83893800  | 0.46153900  | 1.81785800  |
| S | -0.20951600 | 4.26919500  | 0.56546700  |
| S | -4.75580400 | 1.75433400  | 0.02792300  |
| S | -3.50555500 | -3.37904700 | -0.13295200 |
| S | 1.54213500  | -3.34930500 | -0.94323600 |
| C | 4.02727900  | -2.27857200 | -1.45627900 |
| C | 5.36597000  | -2.07726100 | -1.60202100 |
| O | 3.36072700  | -1.11425900 | -1.57326700 |
| C | 5.49264800  | -0.69790300 | -1.83165100 |
| H | 6.14046100  | -2.81664800 | -1.54865000 |
| C | 4.25828500  | -0.13166600 | -1.80701800 |
| C | 3.79408600  | 1.21034900  | -1.94929900 |
| C | 4.55157300  | 2.34159200  | -2.03652700 |
| S | 2.11072300  | 1.56273700  | -2.00378500 |
| C | 3.73767600  | 3.48400900  | -2.14621800 |
| H | 5.62666700  | 2.36256300  | -2.00792800 |
| C | 2.40767100  | 3.23882400  | -2.15086600 |
| H | 1.60444000  | 3.94887000  | -2.21532600 |
| F | 6.62110500  | -0.04128300 | -2.02577200 |
| F | 4.25603900  | 4.70213600  | -2.22127800 |

TOS-1

0 1

|   |             |             |             |
|---|-------------|-------------|-------------|
| C | -2.61776500 | 0.84623200  | 0.00053000  |
| C | -2.58965100 | -0.50488100 | 0.00009200  |
| C | -1.29945000 | -1.06869800 | -0.00031700 |
| C | -0.34053900 | -0.10189700 | -0.00013600 |
| C | 1.07770200  | -0.29497000 | 0.00002800  |
| C | 2.13697000  | 0.54981300  | 0.00003700  |
| O | 1.55418500  | -1.55787100 | 0.00023100  |
| C | 3.32225800  | -0.21538100 | 0.00021700  |
| C | 2.89338800  | -1.49504000 | 0.00030000  |
| H | 3.40619900  | -2.43671900 | 0.00042800  |
| S | -1.02890500 | 1.47651300  | -0.00063500 |
| H | -3.47794700 | 1.48844000  | 0.00104800  |

|   |             |             |             |
|---|-------------|-------------|-------------|
| F | 2.05247500  | 1.86840900  | -0.00009400 |
| H | -1.09718800 | -2.12540800 | -0.00040100 |
| H | 4.33375700  | 0.14256000  | 0.00026400  |
| F | -3.67839800 | -1.25965100 | 0.00037000  |

TOS-2

0 1

|   |             |             |             |
|---|-------------|-------------|-------------|
| C | 6.26959600  | -0.43462100 | -0.00005900 |
| C | 5.49111200  | -1.53952100 | -0.00004000 |
| C | 4.10634000  | -1.28730600 | -0.00002800 |
| C | 3.85243400  | 0.05194500  | -0.00003900 |
| C | 2.57080500  | 0.68092700  | -0.00003200 |
| C | 2.15671700  | 1.97337000  | -0.00004100 |
| O | 1.47245000  | -0.10479400 | -0.00001200 |
| C | 0.75378200  | 1.99867200  | -0.00002600 |
| C | 0.38508100  | 0.68771700  | -0.00000800 |
| C | -0.89159600 | 0.04592300  | 0.00001200  |
| C | -1.17881600 | -1.28767100 | 0.00003100  |
| C | -2.54548000 | -1.60101500 | 0.00004600  |
| C | -3.31483500 | -0.47650400 | 0.00003900  |
| C | -4.74122800 | -0.41047900 | 0.00005000  |
| C | -5.63235200 | 0.61153500  | 0.00004400  |
| O | -5.43678000 | -1.56768000 | 0.00007100  |
| C | -6.93478800 | 0.07160200  | 0.00006300  |
| C | -6.74219700 | -1.26466800 | 0.00007700  |
| H | -7.41643100 | -2.09846700 | 0.00009200  |
| S | -2.35655400 | 0.95479600  | 0.00001200  |
| S | 5.30563000  | 0.97676700  | -0.00006300 |
| H | 7.34185000  | -0.38358000 | -0.00007000 |
| F | -5.31168100 | 1.89217500  | 0.00002500  |
| F | 2.95789800  | 3.02257500  | -0.00006100 |
| F | -0.25183200 | -2.22807300 | 0.00003500  |
| F | 5.97390600  | -2.77309600 | -0.00003300 |
| H | -7.86562300 | 0.60520200  | 0.00006500  |
| H | -2.93421200 | -2.60411600 | 0.00006200  |
| H | 0.11610900  | 2.86240600  | -0.00002800 |
| H | 3.34567400  | -2.04835200 | -0.00001300 |

TOS-3

0 1

|   |             |             |             |
|---|-------------|-------------|-------------|
| C | 10.00295300 | 2.18798000  | -0.00008100 |
| C | 10.41207100 | 0.90125400  | -0.00005700 |
| O | 8.66533100  | 2.27329600  | -0.00008300 |
| C | 9.21608300  | 0.15545200  | -0.00004200 |
| C | 8.16927800  | 1.01789700  | -0.00005900 |
| C | 6.75172600  | 0.84622600  | -0.00005500 |
| C | 5.80492700  | 1.82673400  | -0.00007300 |
| C | 4.51066700  | 1.28848700  | -0.00006300 |
| C | 4.45175900  | -0.07501900 | -0.00003800 |
| C | 3.29386700  | -0.91091600 | -0.00002200 |
| C | 3.12731200  | -2.26353900 | 0.00000400  |
| O | 2.09946700  | -0.29211800 | -0.00003500 |
| C | 1.73731800  | -2.45045600 | 0.00000900  |
| C | 1.13257300  | -1.23444500 | -0.00001600 |
| C | -0.22480300 | -0.80506900 | -0.00002300 |
| C | -0.67436100 | 0.48286700  | -0.00005600 |
| C | -2.07422500 | 0.53466700  | -0.00003900 |

|   |              |             |             |
|---|--------------|-------------|-------------|
| C | -2.70008200  | -0.67831000 | 0.00000300  |
| S | 6.04716000   | -0.72610100 | -0.00002300 |
| S | -1.52307400  | -1.93870200 | 0.00000100  |
| C | -4.10058800  | -0.95793800 | 0.00004000  |
| C | -4.81003400  | -2.12080500 | 0.00009300  |
| O | -4.93402000  | 0.09818500  | 0.00002200  |
| C | -6.15476900  | -1.71648500 | 0.00010400  |
| C | -6.20329800  | -0.36100800 | 0.00005500  |
| C | -7.26567700  | 0.59282300  | 0.00003300  |
| C | -7.14435100  | 1.95017700  | -0.00006500 |
| S | -8.91641800  | 0.09997600  | 0.00002800  |
| C | -8.40729600  | 2.57125800  | 0.00005600  |
| C | -9.45839700  | 1.72134900  | 0.00023300  |
| H | -10.50373300 | 1.96537100  | 0.00038200  |
| F | 9.10895700   | -1.16060000 | -0.00001700 |
| F | 1.10103600   | -3.60631200 | 0.00003300  |
| F | -7.21144600  | -2.50774300 | 0.00015400  |
| H | 11.41788100  | 0.52774400  | -0.00005000 |
| H | 3.88780200   | -3.02118200 | 0.00002000  |
| H | -4.42998300  | -3.12485900 | 0.00012200  |
| F | 3.43747700   | 2.05783900  | -0.00007800 |
| F | -2.72486800  | 1.68388900  | -0.00005400 |
| F | -8.53456300  | 3.88994200  | 0.00006700  |
| H | 6.02055000   | 2.88064600  | -0.00009300 |
| H | -0.03362300  | 1.34733500  | -0.00008200 |
| H | -6.20434300  | 2.47399000  | -0.00015000 |
| H | 10.53127700  | 3.12107600  | -0.00009900 |

TOS-4

0 1

|   |              |             |             |
|---|--------------|-------------|-------------|
| C | -11.27973200 | 2.09466900  | 0.00014700  |
| C | -12.46470200 | 1.43544100  | 0.00017500  |
| C | -13.50644200 | 2.38502600  | 0.00017800  |
| C | -12.87156500 | 3.57664300  | 0.00015300  |
| O | -11.54053000 | 3.41890600  | 0.00013300  |
| C | -9.91668400  | 1.66922500  | 0.00013100  |
| C | -8.80748800  | 2.46161000  | 0.00010200  |
| C | -7.63250800  | 1.69738700  | 0.00008800  |
| C | -7.82188600  | 0.34593900  | 0.00010500  |
| C | -6.83984800  | -0.69069200 | 0.00009300  |
| C | -6.93552200  | -2.05027900 | 0.00011100  |
| O | -5.54944000  | -0.31130800 | 0.00005800  |
| C | -5.60752100  | -2.49968700 | 0.00008800  |
| C | -4.78079700  | -1.42197400 | 0.00005500  |
| C | -3.36644700  | -1.26133700 | 0.00002200  |
| C | -2.67854300  | -0.08287300 | -0.00001500 |
| C | -1.29508300  | -0.29993400 | -0.00003500 |
| C | -0.91320700  | -1.61095000 | -0.00001300 |
| C | 0.40756700   | -2.15250900 | -0.00001900 |
| C | 0.88169100   | -3.43090500 | 0.00000200  |
| O | 1.42702900   | -1.27486100 | -0.00005000 |
| C | 2.27756100   | -3.29161300 | -0.00001400 |
| C | 2.58464300   | -1.96891600 | -0.00004900 |
| C | 3.81039900   | -1.24490400 | -0.00008100 |
| C | 3.96625300   | 0.11033200  | -0.00012300 |
| C | 5.32098200   | 0.46808500  | -0.00013200 |
| C | 6.19711300   | -0.57818900 | -0.00009700 |



|   |              |             |             |
|---|--------------|-------------|-------------|
| S | -9.50913600  | -0.00439000 | 0.00015100  |
| S | -2.30946400  | -2.62271700 | 0.00002100  |
| S | 5.32644400   | -2.06591700 | -0.00008100 |
| C | 7.62487500   | -0.54707400 | -0.00008500 |
| C | 8.56618100   | -1.53169500 | -0.00005800 |
| O | 8.21316200   | 0.66309300  | -0.00010300 |
| C | 9.79315200   | -0.85012000 | -0.00006700 |
| C | 9.55171500   | 0.48473000  | -0.00010900 |
| C | 10.38809600  | 1.64129400  | -0.00015500 |
| C | 9.98362900   | 2.94253100  | -0.00028100 |
| S | 12.10554900  | 1.50604700  | -0.00026700 |
| C | 11.08781400  | 3.81528500  | -0.00007400 |
| C | 12.29402500  | 3.20556800  | 0.00018600  |
| H | 13.26455700  | 3.66413400  | 0.00044000  |
| F | -12.59588500 | 0.12208300  | 0.00019400  |
| F | -5.20487000  | -3.75576100 | 0.00009600  |
| F | 3.16734500   | -4.26638400 | -0.00000100 |
| F | 10.99430000  | -1.39821100 | -0.00004500 |
| H | -14.56316900 | 2.19945700  | 0.00019800  |
| H | -7.82763700  | -2.64748300 | 0.00013900  |
| H | 0.31598700   | -4.34331100 | 0.00002800  |
| H | 8.40871300   | -2.59365900 | -0.00003600 |
| F | -6.43825100  | 2.25973500  | 0.00005600  |
| F | -0.43664800  | 0.70319900  | -0.00006600 |
| F | 5.70861800   | 1.73071500  | -0.00016000 |
| F | 10.93489000  | 5.13129100  | 0.00000200  |
| H | -8.82801600  | 3.53716400  | 0.00008900  |
| H | -3.14147400  | 0.88838100  | -0.00002400 |
| H | 3.15148500   | 0.81319700  | -0.00014000 |
| H | 8.95438200   | 3.25661500  | -0.00038200 |
| H | -13.22270600 | 4.58981900  | 0.00014500  |

TOS-5

0 1

|   |             |             |             |
|---|-------------|-------------|-------------|
| C | 8.18385800  | -1.13205800 | -0.00007600 |
| C | 9.22103000  | -2.00959800 | -0.00009700 |
| C | 10.42300500 | -1.28824400 | -0.00010200 |
| C | 10.04011000 | 0.02017000  | -0.00008700 |
| O | 8.69855400  | 0.11653000  | -0.00006200 |
| C | 10.78158500 | 1.24038600  | -0.00008500 |
| C | 10.31494600 | 2.52282900  | -0.00011100 |
| C | 11.30505900 | 3.51493000  | -0.00010600 |
| C | 12.55506600 | 2.97088000  | -0.00007600 |
| C | 13.79956500 | 3.67130400  | -0.00005600 |
| C | 15.09656000 | 3.27442700  | -0.00003800 |
| O | 13.77805000 | 5.02084100  | -0.00005900 |
| C | 15.91648300 | 4.42092500  | -0.00002900 |
| C | 15.04635000 | 5.45336000  | -0.00004500 |
| C | 6.76810600  | -1.27885400 | -0.00006800 |
| C | 5.84035800  | -0.27809400 | -0.00004700 |
| C | 4.53736500  | -0.79161900 | -0.00005000 |
| C | 4.45088500  | -2.15452500 | -0.00007300 |
| C | 3.27616500  | -2.96524400 | -0.00009500 |
| C | 3.07964600  | -4.31450500 | -0.00019100 |
| O | 2.09576600  | -2.32077600 | 0.00000600  |
| C | 1.68576400  | -4.47047600 | -0.00016500 |
| C | 1.10818500  | -3.24132000 | -0.00004700 |

|   |              |             |             |
|---|--------------|-------------|-------------|
| C | -0.23795200  | -2.77972100 | 0.00002200  |
| C | -0.65314900  | -1.47993800 | 0.00013700  |
| C | -2.05045100  | -1.39151900 | 0.00016600  |
| C | -2.70818900  | -2.58813600 | 0.00007300  |
| C | -4.11501200  | -2.82977500 | 0.00007100  |
| C | -4.85519200  | -3.97475200 | 0.00007400  |
| O | -4.92011100  | -1.75239900 | 0.00007700  |
| C | -6.18772900  | -3.53633300 | 0.00005600  |
| C | -6.20163800  | -2.17865300 | 0.00006500  |
| C | -7.23330500  | -1.19751500 | 0.00006800  |
| C | -7.06851000  | 0.15649500  | 0.00009700  |
| C | -8.30168100  | 0.82085500  | 0.00009700  |
| C | -9.39843000  | 0.00785500  | 0.00006500  |
| S | 12.50496500  | 1.24911100  | -0.00006400 |
| S | 6.03347700   | -2.83807200 | -0.00007500 |
| S | -1.56453300  | -3.87958100 | -0.00003100 |
| S | -8.89847700  | -1.64233600 | 0.00002100  |
| C | -10.77779000 | 0.37893900  | 0.00006400  |
| C | -11.93235300 | -0.34431400 | 0.00005300  |
| O | -11.05160800 | 1.69601000  | 0.00007000  |
| C | -12.95487300 | 0.61802900  | 0.00004600  |
| C | -12.39238000 | 1.85249100  | 0.00008300  |
| C | -12.91381900 | 3.18088200  | 0.00011000  |
| C | -12.19247600 | 4.33721300  | 0.00011000  |
| S | -14.60892300 | 3.48450500  | 0.00011400  |
| C | -13.03931000 | 5.46102900  | 0.00011600  |
| C | -14.36079200 | 5.17660700  | 0.00010700  |
| H | -15.18361400 | 5.86595500  | 0.00009200  |
| F | 15.50121500  | 2.01820100  | -0.00002900 |
| F | 9.09350500   | -3.32285100 | -0.00011000 |
| F | 1.02245000   | -5.61069100 | -0.00024000 |
| F | -7.26567600  | -4.29742500 | 0.00004500  |
| F | -14.25450400 | 0.38399500  | 0.00002500  |
| H | 16.98866800  | 4.46054700  | -0.00001500 |
| H | 11.42165500  | -1.68217500 | -0.00012100 |
| H | 3.82326100   | -5.08868500 | -0.00028000 |
| H | -4.50057500  | -4.98803600 | 0.00008300  |
| H | -12.04024800 | -1.41243000 | 0.00004400  |
| F | 9.02937500   | 2.82335700  | -0.00013700 |
| F | 3.47904000   | -0.00220100 | -0.00004100 |
| F | -2.67201900  | -0.22676900 | 0.00026600  |
| F | -8.38054200  | 2.13927800  | 0.00012900  |
| F | -12.55831700 | 6.69548500  | 0.00009800  |
| H | 11.10158500  | 4.57128700  | -0.00012000 |
| H | 6.07997200   | 0.77078100  | -0.00003500 |
| H | 0.01073100   | -0.63312600 | 0.00019200  |
| H | -6.11252200  | 0.65018800  | 0.00012300  |
| H | -11.11713700 | 4.37851200  | 0.00009700  |
| H | 15.17773900  | 6.51759000  | -0.00004600 |

TOS-6

0 1

|   |            |             |             |
|---|------------|-------------|-------------|
| C | 4.75530400 | -3.80434000 | 0.00024100  |
| C | 5.57578500 | -4.88688400 | -0.00015500 |
| C | 6.90618800 | -4.44545700 | -0.00023600 |
| C | 6.81863800 | -3.08478500 | 0.00012700  |
| O | 5.53045800 | -2.69801800 | 0.00041600  |

|   |              |             |             |
|---|--------------|-------------|-------------|
| C | 7.80678800   | -2.05501300 | 0.00023300  |
| C | 7.62650300   | -0.70148900 | 0.00066700  |
| C | 8.80483000   | 0.05571400  | 0.00060100  |
| C | 9.90984400   | -0.74512900 | 0.00010200  |
| C | 11.27058400  | -0.32718600 | -0.00015200 |
| C | 12.45665100  | -0.98892300 | -0.00061100 |
| O | 11.53529900  | 0.99703200  | 0.00008000  |
| C | 13.49771400  | -0.04992400 | -0.00067500 |
| C | 12.87022400  | 1.16048400  | -0.00023600 |
| C | 3.34242600   | -3.63478600 | 0.00046700  |
| C | 2.66365200   | -2.45082400 | 0.00088000  |
| C | 1.27897900   | -2.65737200 | 0.00089000  |
| C | 0.88678100   | -3.96562300 | 0.00050100  |
| C | 13.36360900  | 2.50033000  | -0.00007200 |
| C | 12.65931700  | 3.66903600  | 0.00039000  |
| C | 13.44017900  | 4.83317700  | 0.00042200  |
| C | 14.77155100  | 4.53901100  | -0.00002900 |
| C | 15.86235400  | 5.46043700  | -0.00015100 |
| C | 17.21024100  | 5.30769500  | -0.00056000 |
| O | 15.59349900  | 6.78288300  | 0.00019300  |
| C | 17.80614700  | 6.58484600  | -0.00047000 |
| C | 16.76141600  | 7.44028200  | -0.00000300 |
| H | 16.69564900  | 8.51056500  | 0.00023100  |
| C | -0.43882300  | -4.49458500 | 0.00031900  |
| C | -0.92729900  | -5.76806400 | 0.00002700  |
| O | -1.44820700  | -3.60583800 | 0.00042800  |
| C | -2.32153800  | -5.61289300 | -0.00004000 |
| C | -2.61351800  | -4.28697400 | 0.00020400  |
| C | -3.82905300  | -3.54698500 | 0.00023900  |
| C | -3.96229100  | -2.18904600 | 0.00049600  |
| C | -5.31031500  | -1.80937900 | 0.00038700  |
| C | -6.20382300  | -2.84172500 | 0.00005600  |
| C | -7.62992800  | -2.78322800 | -0.00017200 |
| C | -8.59249300  | -3.74874400 | -0.00046000 |
| O | -8.19221500  | -1.56136000 | -0.00011800 |
| C | -9.80398300  | -3.04255400 | -0.00058700 |
| C | -9.53475000  | -1.71173700 | -0.00037900 |
| C | -10.34112000 | -0.53920800 | -0.00039600 |
| C | -9.90084600  | 0.75179100  | -0.00017400 |
| C | -10.97082100 | 1.65576200  | -0.00019000 |
| C | -12.21134100 | 1.08655700  | -0.00042000 |
| S | 15.05291300  | 2.83963500  | -0.00047500 |
| S | 9.49206700   | -2.41707200 | -0.00022100 |
| S | 2.27541100   | -4.98835100 | 0.00023000  |
| S | -5.35757600  | -4.34397300 | -0.00008000 |
| S | -12.06225700 | -0.63184200 | -0.00078700 |
| C | -13.48693300 | 1.72923000  | -0.00042800 |
| C | -14.76254900 | 1.25057500  | -0.00065800 |
| O | -13.49276100 | 3.07409000  | -0.00016200 |
| C | -15.57273800 | 2.39757300  | -0.00052400 |
| C | -14.77530000 | 3.49496100  | -0.00021900 |
| C | -15.02053100 | 4.90108800  | 0.00003400  |
| C | -14.08274500 | 5.88991800  | 0.00028400  |
| S | -16.62070700 | 5.53846100  | -0.00006700 |
| C | -14.68731400 | 7.16051700  | 0.00076200  |
| C | -16.03911000 | 7.14666100  | 0.00081500  |
| H | -16.70741400 | 7.98666000  | 0.00124600  |

|   |              |             |             |
|---|--------------|-------------|-------------|
| F | 17.83686300  | 4.14576400  | -0.00097200 |
| F | 12.58252400  | -2.30184600 | -0.00094100 |
| F | 5.16495700   | -6.14030500 | -0.00042300 |
| F | -3.22421100  | -6.57544500 | -0.00030500 |
| F | -11.01687100 | -3.56210300 | -0.00087100 |
| F | -16.89260200 | 2.42736800  | -0.00066700 |
| H | 18.85282900  | 6.82060500  | -0.00071700 |
| H | 14.55324800  | -0.24549800 | -0.00100000 |
| H | 7.79488000   | -5.04771200 | -0.00052400 |
| H | -0.37150900  | -6.68651000 | -0.00012200 |
| H | -8.45641500  | -4.81361900 | -0.00056900 |
| H | -15.08112600 | 0.22533000  | -0.00089300 |
| F | 11.33995200  | 3.71547600  | 0.00077600  |
| F | 6.43513100   | -0.13314100 | 0.00108700  |
| F | 0.42813900   | -1.64779300 | 0.00119000  |
| F | -5.67747900  | -0.54108600 | 0.00056300  |
| F | -10.77574900 | 2.96184400  | 0.00007700  |
| F | -13.96881400 | 8.27368800  | 0.00130000  |
| H | 13.03755900  | 5.83075900  | 0.00075300  |
| H | 8.83554900   | 1.13118200  | 0.00087700  |
| H | 3.13464600   | -1.48344700 | 0.00110100  |
| H | -3.13585300  | -1.49999100 | 0.00072300  |
| H | -8.86331000  | 1.03694400  | 0.00005400  |
| H | -13.02074800 | 5.71613400  | 0.00034600  |
