# Supplementary material for: Folding oligomers of difluorinated thienylfurans: a DFT study
Source: Royal Society of Chemistry journal article supplement (doi:10.1039/b916415d), 2009-11-18
Supplement: b916415d.zip [file b916415d.zip]

Relative Energies (kcal/mol),  $E_{\text{trans}} - E_{\text{cis}}$ , of oligomers of size  $n = 1-6$ . MPWB1K and B3LYP relative energies calculated using geometries obtained using the respective functional and the 6-31G(d) basis set. MPWB1K\* and B3LYP\* refers to the relative energies after removal of the estimated  $\pi$ - $\pi$  interactions that occur for  $n > 4$ .

| n | (2FSO) <sub>n</sub> |       |         |        |
|---|---------------------|-------|---------|--------|
|   | MPWB1K              | B3LYP | MPWB1K* | B3LYP* |
| 1 | 2.24                | 2.17  | 2.24    | 2.17   |
| 2 | 6.71                | 6.69  | 6.71    | 6.69   |
| 3 | 11.31               | 11.21 | 11.31   | 11.21  |
| 4 | 16.17               | 15.65 | 16.17   | 15.65  |
| 5 | 23.54               | 20.59 | 21.23   | 20.46  |
| 6 | 34.35               | 25.16 | 25.86   | 24.80  |

| n | (2FOS) <sub>n</sub> |       |         |        |
|---|---------------------|-------|---------|--------|
|   | MPWB1K              | B3LYP | MPWB1K* | B3LYP* |
| 1 | 0.21                | 0.21  | 0.21    | 0.21   |
| 2 | 0.61                | 0.69  | 0.61    | 0.69   |
| 3 | 1.20                | 1.14  | 1.20    | 1.14   |
| 4 | 1.55                | 1.51  | 1.55    | 1.51   |
| 5 | 5.44                | 2.37  | 3.37    | 2.31   |
| 6 | 10.20               | 3.01  | 2.40    | 2.83   |

| n | (FSFO) <sub>n</sub> |       |         |        |
|---|---------------------|-------|---------|--------|
|   | MPWB1K              | B3LYP | MPWB1K* | B3LYP* |
| 1 | 2.32                | 2.28  | 2.32    | 2.28   |
| 2 | 4.40                | 4.62  | 4.40    | 4.62   |
| 3 | 6.81                | 6.92  | 6.81    | 6.92   |
| 4 | 9.36                | 9.14  | 9.36    | 9.14   |
| 5 | 14.78               | 11.80 | 12.94   | 11.99  |
| 6 | 20.70               | 14.09 | 14.66   | 14.24  |

| n | (FOFS) <sub>n</sub> |       |         |        |
|---|---------------------|-------|---------|--------|
|   | MPWB1K              | B3LYP | MPWB1K* | B3LYP* |
| 1 | 0.15                | 0.20  | 0.15    | 0.20   |
| 2 | 2.47                | 2.52  | 2.47    | 2.52   |
| 3 | 4.63                | 4.84  | 4.63    | 4.84   |
| 4 | 6.96                | 7.04  | 6.96    | 7.04   |
| 5 | 12.31               | 9.71  | 10.64   | 9.92   |
| 6 | 18.51               | 12.01 | 11.46   | 11.99  |
