# Supplementary material for: Folding oligomers of difluorinated thienylfurans: a DFT study
Source: Royal Society of Chemistry journal article supplement (doi:10.1039/b916415d), 2009-11-18
Supplement: b916415d.zip [file b916415d.zip]

Cartesian coordinates of B3LYP/6-31G(d) optimized geometries  
all-cisoid C2FSO-n, and all-transoid T2FSO-n, n = 1-6.  
Charge and multiplicity are given first.

C2FSO-1

|     |             |             |             |
|-----|-------------|-------------|-------------|
| 0 1 |             |             |             |
| C   | 0.06727900  | -0.14603500 | 0.00008900  |
| C   | 2.36995100  | -1.16880400 | 0.00046100  |
| C   | -3.45765800 | -0.51822700 | -0.00117600 |
| C   | -3.46744300 | 0.84354700  | 0.00112500  |
| C   | -2.09930600 | 1.25707100  | 0.00176700  |
| C   | -1.34911900 | 0.10777200  | 0.00010300  |
| C   | 2.38554300  | 0.19286000  | -0.00009700 |
| C   | 1.08688100  | 0.77203800  | -0.00035000 |
| O   | -2.17566900 | -0.98508600 | -0.00205400 |
| H   | -4.22826100 | -1.27339100 | -0.00245600 |
| S   | 0.73583400  | -1.76695100 | 0.00088500  |
| F   | 3.48830000  | 0.95206900  | -0.00052600 |
| F   | 0.89879600  | 2.10143000  | -0.00092000 |
| H   | -1.71278600 | 2.26511700  | 0.00344100  |
| H   | -4.34111300 | 1.48016300  | 0.00217900  |
| H   | 3.21353900  | -1.84280200 | 0.00059400  |

C2FSO-2

|     |             |             |             |
|-----|-------------|-------------|-------------|
| 0 1 |             |             |             |
| C   | -3.38843400 | -0.00804500 | -0.00000600 |
| C   | -1.09657700 | 1.06813000  | -0.00000500 |
| C   | 0.30627400  | 1.35455000  | 0.00006000  |
| C   | 2.44188800  | 0.77939500  | 0.00006200  |
| C   | 3.51294300  | -0.17506200 | -0.00001300 |
| C   | 4.94620200  | -2.24652400 | -0.00019200 |
| C   | -5.41543900 | -2.91218600 | 0.00029000  |
| C   | -6.45045800 | -2.02625000 | -0.00005100 |
| C   | -5.86659200 | -0.72282300 | -0.00017400 |
| C   | -4.50527400 | -0.90962700 | 0.00003200  |
| C   | 2.40267000  | 2.15468400  | 0.00020000  |
| C   | 1.03220900  | 2.52467900  | 0.00025400  |
| C   | -2.13822700 | 1.96739200  | -0.00010700 |
| C   | -3.41614100 | 1.36673400  | -0.00010000 |
| C   | 4.86336100  | 0.07814100  | 0.00005800  |
| C   | 5.66926400  | -1.09181200 | -0.00003700 |
| O   | 1.16324100  | 0.28374200  | -0.00005200 |
| O   | -4.22236200 | -2.25076500 | 0.00033700  |
| H   | -5.35096900 | -3.98918000 | 0.00050500  |
| S   | -1.72634800 | -0.57135600 | 0.00003300  |
| S   | 3.23971200  | -1.90767300 | -0.00023600 |
| F   | 7.00566300  | -1.01879800 | 0.00002800  |
| F   | 5.39349400  | 1.31101400  | 0.00021700  |
| F   | -1.97517300 | 3.29928300  | -0.00017300 |
| F   | -4.54559400 | 2.09181100  | -0.00017900 |
| H   | 3.26119400  | 2.80941200  | 0.00028800  |
| H   | 0.61927200  | 3.52217500  | 0.00038300  |
| H   | -6.37364800 | 0.23022700  | -0.00042100 |
| H   | -7.50387100 | -2.26885800 | -0.00017400 |
| H   | 5.31565200  | -3.26116400 | -0.00028400 |

## C2FSO-3

0 1

|   |             |             |             |
|---|-------------|-------------|-------------|
| C | 5.26529200  | 1.49146900  | -0.00000800 |
| C | 4.23395800  | -0.82097500 | 0.00002000  |
| C | 3.36348100  | -1.95644200 | -0.00004400 |
| C | 1.37739400  | -2.93048100 | -0.00009400 |
| C | -0.05256000 | -2.92225600 | -0.00008200 |
| C | -2.51147500 | -2.31700900 | -0.00001700 |
| C | -3.78171400 | -1.65858800 | 0.00005300  |
| C | -5.08125200 | 0.13094400  | 0.00009900  |
| C | 4.89719700  | 5.01332500  | -0.00059200 |
| C | 6.25956000  | 5.02146800  | 0.00011300  |
| C | 6.67188500  | 3.65415900  | 0.00044700  |
| C | 5.52056800  | 2.90370000  | -0.00004900 |
| C | 2.31513400  | -3.94035700 | -0.00015900 |
| C | 3.58782900  | -3.31614400 | -0.00011800 |
| C | 5.61064100  | -0.82058400 | 0.00021100  |
| C | 6.18492100  | 0.46877100  | 0.00019300  |
| C | -0.89833500 | -4.00971000 | -0.00010400 |
| C | -2.26734000 | -3.67246600 | -0.00008300 |
| C | -5.91537400 | -0.96369600 | 0.00021100  |
| C | -5.08237800 | -2.11248400 | 0.00018800  |
| O | 2.01337000  | -1.71471500 | -0.00004000 |
| O | -3.77543400 | -0.28690800 | 0.00000200  |
| O | 4.42860400  | 3.73231000  | -0.00068300 |
| C | -5.31548900 | 1.54609700  | 0.00008200  |
| C | -5.13154700 | 4.05787300  | 0.00014800  |
| C | -6.41934000 | 3.61287000  | 0.00004200  |
| C | -6.52603400 | 2.19638200  | -0.00000100 |
| H | 4.14328000  | 5.78513100  | -0.00106500 |
| S | 3.63881600  | 0.83135900  | -0.00017600 |
| S | -0.99096200 | -1.43791800 | -0.00001800 |
| S | -4.01540100 | 2.72360700  | 0.00013700  |
| F | -7.50530400 | 4.39496000  | -0.00002100 |
| F | -7.71224500 | 1.56907700  | -0.00008300 |
| F | -3.23239700 | -4.60418800 | -0.00010800 |
| F | -0.47570300 | -5.28315700 | -0.00016000 |
| F | 6.35757800  | -1.93538800 | 0.00037700  |
| F | 7.51344300  | 0.65785100  | 0.00035900  |
| H | -6.99461100 | -0.93333500 | 0.00031200  |
| H | -5.38896100 | -3.14768900 | 0.00027200  |
| H | 2.09999900  | -4.99828300 | -0.00023200 |
| H | 4.55623400  | -3.79316000 | -0.00015600 |
| H | 7.67972100  | 3.26715400  | 0.00099000  |
| H | 6.89687200  | 5.89460500  | 0.00035400  |
| H | -4.78257200 | 5.07974100  | 0.00020300  |

## C2FSO-4

0 1

|   |             |             |             |
|---|-------------|-------------|-------------|
| C | -4.65046500 | 3.36300800  | 0.36775100  |
| C | -5.33523800 | 0.96262700  | -0.05697600 |
| C | -5.39711400 | -0.45641900 | -0.22912700 |
| C | -4.50715000 | -2.47995100 | -0.31564700 |
| C | -3.41394100 | -3.39959000 | -0.25505000 |

|   |             |             |             |
|---|-------------|-------------|-------------|
| C | -1.15251700 | -4.52586100 | -0.09075000 |
| C | 0.23610000  | -4.84223200 | 0.03540000  |
| C | 2.37734300  | -4.31289700 | 0.20715600  |
| C | -2.15653600 | 5.74349600  | 1.17642000  |
| C | -3.17253600 | 6.64512100  | 1.07148100  |
| C | -4.34218000 | 5.89852000  | 0.73350300  |
| C | -3.95176000 | 4.58306200  | 0.65625600  |
| C | -5.86077500 | -2.63200600 | -0.52506600 |
| C | -6.43103900 | -1.33521200 | -0.47056900 |
| C | -6.37171600 | 1.86479200  | -0.13988500 |
| C | -5.98919200 | 3.20269900  | 0.09642800  |
| C | -3.46535600 | -4.77457100 | -0.32853200 |
| C | -2.20618500 | -5.40176300 | -0.23533300 |
| C | 2.30395700  | -5.68890400 | 0.24355600  |
| C | 0.93215300  | -6.02813400 | 0.13219600  |
| O | -4.21833100 | -1.15093600 | -0.13500000 |
| O | 1.11527300  | -3.79056500 | 0.08085100  |
| O | -2.61154400 | 4.48206000  | 0.92626900  |
| C | 3.46304900  | -3.38398100 | 0.26165200  |
| C | 4.95023400  | -1.33513600 | 0.24297800  |
| C | 5.62764100  | -2.51799600 | 0.44055400  |
| C | 5.49716300  | -0.01489400 | 0.17393700  |
| C | 5.34980400  | 2.17126400  | -0.12542300 |
| C | 6.67417500  | 1.89492300  | 0.12694600  |
| O | 4.62462300  | 1.00832700  | -0.09687700 |
| C | 6.76975700  | 0.49216500  | 0.31898300  |
| C | 4.79962500  | -3.65928600 | 0.44991600  |
| H | -1.10669300 | 5.82160600  | 1.41296500  |
| C | 4.63395700  | 3.38208300  | -0.40656200 |
| C | 2.91397700  | 5.13630600  | -0.95859500 |
| C | 4.16638600  | 5.64570600  | -0.78908400 |
| C | 5.13895200  | 4.65817900  | -0.47757100 |
| S | -3.84258000 | 1.80537300  | 0.32635900  |
| S | -1.74892000 | -2.87419500 | -0.06779300 |
| S | 3.23249600  | -1.65395900 | 0.06689500  |
| S | 2.91125600  | 3.41126000  | -0.73469500 |
| F | 4.49308100  | 6.93915900  | -0.89610800 |
| F | 6.43012500  | 4.96391500  | -0.27676000 |
| F | 6.95608300  | -2.59740600 | 0.60858400  |
| F | 5.28857300  | -4.89587300 | 0.62614400  |
| F | -2.06550600 | -6.73496200 | -0.28447900 |
| F | -4.60254300 | -5.47121500 | -0.47458300 |
| F | -7.63909300 | 1.52265300  | -0.41668600 |
| F | -6.87042600 | 4.21371200  | 0.05698100  |
| H | 7.47231200  | 2.62097200  | 0.16470800  |
| H | 7.65667000  | -0.08367600 | 0.53686300  |
| H | 3.14313900  | -6.36199800 | 0.33564800  |
| H | 0.49605100  | -7.01576200 | 0.12505500  |
| H | -6.36929200 | -3.56877500 | -0.69693700 |
| H | -7.47009100 | -1.06716400 | -0.58950400 |
| H | -5.34120200 | 6.27347000  | 0.56916700  |
| H | -3.10114200 | 7.71375000  | 1.21814800  |
| H | 2.00797600  | 5.67028300  | -1.20380400 |

C2FSO-5

0 1

|   |             |             |             |
|---|-------------|-------------|-------------|
| C | -4.65249100 | 1.68814500  | -1.30034800 |
| C | -3.42525300 | 3.81535500  | -0.68147000 |
| C | -2.46392200 | 4.82418500  | -0.35702400 |
| C | -0.41420300 | 5.55996900  | 0.03308900  |
| C | 1.00139300  | 5.40506500  | 0.16229500  |
| C | 3.39073000  | 4.57163000  | 0.28401700  |
| C | 4.60166000  | 3.81148200  | 0.27916500  |
| C | 5.76628500  | 1.93553000  | 0.14676000  |
| C | -4.61437100 | -1.75666100 | -2.12265700 |
| C | -5.96751600 | -1.61450300 | -2.19980900 |
| C | -6.24845100 | -0.24819300 | -1.89439000 |
| C | -5.03515600 | 0.35005500  | -1.65007900 |
| C | -1.25560500 | 6.64562000  | 0.14995900  |
| C | -2.56839700 | 6.17431200  | -0.09965000 |
| C | -4.78929800 | 3.96622800  | -0.79455600 |
| C | -5.47263500 | 2.78076800  | -1.13948000 |
| C | 1.92995700  | 6.39345700  | 0.40724300  |
| C | 3.25870400  | 5.93017400  | 0.47369700  |
| C | 6.67752400  | 2.95952700  | 0.29363600  |
| C | 5.93184800  | 4.16089200  | 0.37964800  |
| O | -1.14873800 | 4.44250000  | -0.27559100 |
| O | 4.49478900  | 2.45128700  | 0.13778100  |
| O | -4.02940200 | -0.57057500 | -1.78845700 |
| C | 5.90245500  | 0.51889200  | 0.01181200  |
| C | 5.55251100  | -1.97953100 | -0.20181300 |
| C | 6.87583500  | -1.59573900 | -0.21105700 |
| C | 5.02703100  | -3.30443100 | -0.31316200 |
| C | 3.38331100  | -4.78495500 | -0.32851800 |
| C | 4.54943600  | -5.48385300 | -0.55568600 |
| O | 3.67015400  | -3.45188900 | -0.17988800 |
| C | 5.60292000  | -4.53546000 | -0.54451400 |
| C | 7.07076100  | -0.20515400 | -0.09014700 |
| H | -3.93951400 | -2.58657600 | -2.26196900 |
| C | 2.01038900  | -5.16911000 | -0.21997100 |
| C | -0.49510200 | -5.26539200 | 0.12626900  |
| C | 0.06756400  | -6.46995900 | -0.23324900 |
| C | 1.46388500  | -6.41701500 | -0.42402900 |
| C | -1.87437100 | -4.98217300 | 0.38006200  |
| C | -3.53627900 | -3.65796900 | 0.99660800  |
| C | -4.09891200 | -4.86629800 | 0.65286000  |
| C | -4.07913100 | -2.41810300 | 1.47233000  |
| C | -4.45997800 | -0.09656000 | 2.36344900  |
| C | -5.61654300 | -0.75993900 | 2.08114500  |
| O | -2.17703000 | -3.72230600 | 0.83141000  |
| C | -3.03290500 | -5.71700300 | 0.25811000  |
| C | -5.40430400 | -2.07106600 | 1.57803700  |
| S | -2.98274500 | 2.14805200  | -1.01364300 |
| S | 1.81031200  | 3.85263200  | 0.01416900  |
| S | 4.52257100  | -0.56577800 | -0.04108500 |
| S | 0.74971300  | -4.03118100 | 0.22625800  |
| S | -3.07524100 | -1.08600500 | 2.01034800  |
| F | -6.84898300 | -0.26453400 | 2.24329500  |
| F | -6.41834200 | -2.87867100 | 1.23237400  |
| F | -0.63418400 | -7.60186200 | -0.39442800 |
| F | 2.17947800  | -7.49625100 | -0.77395300 |
| F | 7.89995100  | -2.45464600 | -0.32455700 |
| F | 8.29336600  | 0.34684400  | -0.07811000 |

|   |             |             |             |
|---|-------------|-------------|-------------|
| F | 4.29174800  | 6.75539300  | 0.70020000  |
| F | 1.61662800  | 7.68791200  | 0.56840900  |
| F | -5.43070800 | 5.12868500  | -0.59996500 |
| F | -6.80509900 | 2.74461500  | -1.29275200 |
| H | -5.15176800 | -5.10258300 | 0.69025700  |
| H | -3.09665700 | -6.74143300 | -0.07717300 |
| H | 4.62460200  | -6.55017000 | -0.70780900 |
| H | 6.65677000  | -4.71958700 | -0.68995300 |
| H | 7.75033400  | 2.84561300  | 0.33426300  |
| H | 6.31178300  | 5.16458000  | 0.49664200  |
| H | -0.95255800 | 7.65441900  | 0.38663300  |
| H | -3.48464600 | 6.74521300  | -0.09676000 |
| H | -7.21209300 | 0.23696300  | -1.85585600 |
| H | -6.68201100 | -2.38823200 | -2.44289400 |
| H | -4.34712300 | 0.90544200  | 2.74971900  |

C2FSO-6

0 1

|   |             |             |             |
|---|-------------|-------------|-------------|
| C | -3.78346800 | -1.81320000 | -2.30143200 |
| C | -4.09287600 | 0.66255000  | -1.87152300 |
| C | -3.93798700 | 2.06407300  | -1.62804600 |
| C | -2.75353600 | 3.89340400  | -1.24885300 |
| C | -1.53421900 | 4.61200500  | -1.04573500 |
| C | 0.86490100  | 5.35153500  | -0.70578600 |
| C | 2.28213400  | 5.44433700  | -0.54169500 |
| C | 4.31242500  | 4.59231100  | -0.32543600 |
| C | -1.66883500 | -4.62076100 | -2.74404200 |
| C | -2.83713500 | -5.30918800 | -2.87852200 |
| C | -3.88833200 | -4.35331000 | -2.73438700 |
| C | -3.27983200 | -3.13946700 | -2.51964400 |
| C | -4.07707700 | 4.27741900  | -1.28667700 |
| C | -4.83575400 | 3.10554600  | -1.52928600 |
| C | -5.27193500 | -0.03445500 | -2.01208700 |
| C | -5.09886800 | -1.41370000 | -2.25222000 |
| C | -1.38042000 | 5.97444900  | -0.90502900 |
| C | -0.04583300 | 6.38569100  | -0.71710600 |
| C | 4.45131000  | 5.96357300  | -0.29468900 |
| C | 3.15111700  | 6.50942700  | -0.43192500 |
| O | -2.66336100 | 2.53992300  | -1.45667000 |
| O | 2.98740800  | 4.26946000  | -0.47634800 |
| O | -1.91852600 | -3.29771900 | -2.52489400 |
| C | 5.24416200  | 3.51255800  | -0.22944400 |
| C | 6.40220200  | 1.26739900  | -0.06244700 |
| C | 7.26259100  | 2.34391400  | -0.06139800 |
| C | 6.74146900  | -0.11935500 | 0.00873700  |
| C | 6.25187500  | -2.27326800 | 0.13010400  |
| C | 7.62682200  | -2.17973500 | 0.09053000  |
| O | 5.70594600  | -1.01572000 | 0.08055100  |
| C | 7.94051500  | -0.79998100 | 0.01382600  |
| C | 6.61793300  | 3.59377800  | -0.15226400 |
| H | -0.62724600 | -4.90011300 | -2.77174800 |
| C | 5.34428300  | -3.37466900 | 0.21123200  |
| C | 3.32494000  | -4.88958200 | 0.40384700  |
| C | 4.52122500  | -5.56209600 | 0.27976000  |
| C | 5.64570300  | -4.71879300 | 0.17477800  |
| C | 2.01452100  | -5.45015600 | 0.51520500  |

|   |             |             |             |
|---|-------------|-------------|-------------|
| C | -0.17712500 | -5.31514700 | 0.79269400  |
| C | 0.11991400  | -6.64943200 | 0.61238500  |
| C | -1.39661800 | -4.60428500 | 1.02140400  |
| C | -3.19012200 | -2.88252600 | 1.48802800  |
| C | -3.67755800 | -4.14936100 | 1.25240900  |
| O | 0.97793800  | -4.57791300 | 0.73361900  |
| C | 1.52385400  | -6.73603400 | 0.43603200  |
| C | -2.67822700 | -5.10850400 | 0.99177900  |
| S | -2.73094600 | -0.43260600 | -2.04398700 |
| S | 0.03109400  | 3.82228500  | -0.93805900 |
| S | 4.74285100  | 1.83012000  | -0.18391400 |
| S | 3.61051000  | -3.15669300 | 0.38659800  |
| S | -1.43826900 | -2.88763200 | 1.38416500  |
| C | -3.94108900 | -1.69707000 | 1.76653100  |
| C | -5.28945500 | -1.43450400 | 1.87162900  |
| O | -3.23210700 | -0.54176400 | 1.97485400  |
| C | -5.41429200 | -0.05006100 | 2.15754200  |
| C | -4.13708000 | 0.45999900  | 2.21185800  |
| C | -3.61005700 | 1.77155100  | 2.45556900  |
| C | -4.31358700 | 2.93178900  | 2.67301000  |
| S | -1.89007700 | 2.10679900  | 2.50868200  |
| C | -3.49260400 | 4.07198000  | 2.88022100  |
| C | -2.15938000 | 3.79552700  | 2.82321000  |
| H | -1.33345400 | 4.48046300  | 2.94408000  |
| F | -4.02073500 | 5.28134900  | 3.10438700  |
| F | -5.65356800 | 3.00256500  | 2.68980200  |
| F | -4.98268200 | -4.45946400 | 1.25803700  |
| F | -2.96827300 | -6.39182700 | 0.73137300  |
| F | 4.62532700  | -6.89936200 | 0.25640300  |
| F | 6.89145500  | -5.20004700 | 0.04946800  |
| F | 8.59694600  | 2.23094500  | 0.01758600  |
| F | 7.29765300  | 4.75034100  | -0.16158300 |
| F | 0.28936800  | 7.67572500  | -0.56441700 |
| F | -2.39744500 | 6.84805000  | -0.94215500 |
| F | -6.48704900 | 0.52852200  | -1.93028000 |
| F | -6.13979600 | -2.24638900 | -2.40910400 |
| H | -6.32392200 | 0.51227200  | 2.30579500  |
| H | -6.08260200 | -2.15739900 | 1.75385300  |
| H | -0.59538200 | -7.45807400 | 0.61523400  |
| H | 2.11284600  | -7.62546000 | 0.26898000  |
| H | 8.31524000  | -3.01109300 | 0.11672100  |
| H | 8.91993000  | -0.34835600 | -0.03516800 |
| H | 5.38233200  | 6.49881200  | -0.18383500 |
| H | 2.87384400  | 7.55265600  | -0.45254600 |
| H | -4.44552200 | 5.28356600  | -1.15402000 |
| H | -5.90792600 | 3.02338500  | -1.62433300 |
| H | -4.95265500 | -4.52791400 | -2.78079500 |
| H | -2.94084100 | -6.36997400 | -3.05839000 |

T2FSO-1

0 1

|   |             |             |             |
|---|-------------|-------------|-------------|
| C | -2.45640200 | 1.07711900  | -0.00073100 |
| C | -2.35121000 | -0.27876400 | 0.00035700  |
| S | -0.87799000 | 1.81038300  | -0.00209000 |
| C | -1.00653000 | -0.75035300 | 0.00076600  |
| C | -0.06793300 | 0.25180300  | -0.00011000 |

|   |             |             |             |
|---|-------------|-------------|-------------|
| C | 1.37066000  | 0.15671800  | 0.00039500  |
| C | 2.37471400  | 1.09299000  | 0.00466900  |
| O | 1.91441100  | -1.10068600 | -0.00432100 |
| C | 3.60546500  | 0.36778100  | 0.00249100  |
| H | 2.25109900  | 2.16720800  | 0.00914700  |
| C | 3.26848700  | -0.95187300 | -0.00291100 |
| H | 4.60545000  | 0.77809700  | 0.00474700  |
| H | 3.83675700  | -1.86917300 | -0.00610800 |
| F | -3.38313600 | -1.13098500 | 0.00127500  |
| F | -0.73138500 | -2.05868800 | 0.00225600  |
| H | -3.35357300 | 1.67777200  | -0.00111000 |

#### T2FSO-2

0 1

|   |             |             |             |
|---|-------------|-------------|-------------|
| C | -2.49240300 | -1.10292600 | -0.00044000 |
| C | -2.10001200 | -2.42172400 | -0.00159500 |
| C | -0.68115700 | -2.42462300 | -0.00165000 |
| C | -0.28385500 | -1.10625100 | -0.00058100 |
| O | -1.38717900 | -0.29523200 | 0.00019600  |
| H | -2.75172400 | -3.28441700 | -0.00246000 |
| C | -3.77790200 | -0.45889000 | 0.00017200  |
| C | -4.07951600 | 0.88240700  | -0.00110000 |
| C | -5.47762500 | 1.15499400  | -0.00014200 |
| C | -6.25415600 | 0.03790400  | 0.00184000  |
| F | -3.17993100 | 1.86889400  | -0.00319900 |
| S | -5.26597600 | -1.39397200 | 0.00273900  |
| H | -0.03281900 | -3.28982900 | -0.00251300 |
| F | -5.93847500 | 2.41080000  | -0.00123500 |
| C | 1.00122900  | -0.46832700 | -0.00018900 |
| C | 1.31297700  | 0.87086200  | 0.00006900  |
| S | 2.48510000  | -1.41362900 | 0.00006400  |
| C | 2.70510400  | 1.14327600  | 0.00024100  |
| C | 3.49981400  | 0.02227400  | 0.00014200  |
| C | 4.93399800  | -0.08452600 | 0.00003400  |
| C | 5.79671200  | -1.15434700 | -0.00227900 |
| O | 5.65071100  | 1.08350200  | 0.00272700  |
| C | 7.11667000  | -0.61033700 | -0.00092300 |
| H | 5.52236100  | -2.20026700 | -0.00480800 |
| C | 6.96960600  | 0.74422100  | 0.00207600  |
| H | 8.04875600  | -1.15760700 | -0.00209200 |
| H | 7.66227900  | 1.57161500  | 0.00394400  |
| F | 0.41765500  | 1.86063100  | -0.00000300 |
| F | 3.15986900  | 2.39937000  | 0.00029900  |
| H | -7.33204500 | -0.02522500 | 0.00287400  |

#### T2FSO-3

0 1

|   |             |             |             |
|---|-------------|-------------|-------------|
| C | -1.24018100 | -1.58033200 | -0.00036600 |
| C | -1.82370100 | -2.82854600 | -0.00067700 |
| C | -3.22586500 | -2.62265900 | -0.00065600 |
| C | -3.42567800 | -1.25937800 | -0.00035100 |
| O | -2.21555900 | -0.61865100 | -0.00016400 |
| H | -1.30661200 | -3.77809300 | -0.00091100 |
| C | 0.12313400  | -1.13786500 | -0.00022600 |
| C | 0.62935200  | 0.14186900  | -0.00021200 |

|   |              |             |             |
|---|--------------|-------------|-------------|
| C | 2.04515100   | 0.20663300  | -0.00007300 |
| C | 2.66618000   | -1.02128200 | 0.00001900  |
| F | -0.11167300  | 1.25141200  | -0.00033500 |
| C | 4.06475200   | -1.33757500 | 0.00017500  |
| C | 4.75998800   | -2.52650700 | 0.00044700  |
| O | 4.94757900   | -0.29064500 | 0.00005400  |
| C | 6.13813700   | -2.19163700 | 0.00048600  |
| C | 6.21101700   | -0.81728700 | 0.00024300  |
| H | 6.97343100   | -2.87812200 | 0.00067500  |
| C | 7.31119900   | 0.10814600  | 0.00016800  |
| C | 7.29319200   | 1.48293200  | -0.00007100 |
| C | 8.58985400   | 2.07240900  | -0.00006600 |
| C | 9.60430000   | 1.16577100  | 0.00017500  |
| F | 6.18923700   | 2.23340600  | -0.00029100 |
| S | 1.45032200   | -2.29291000 | -0.00004000 |
| S | 8.97553300   | -0.45630500 | 0.00039600  |
| H | 4.33231300   | -3.51949800 | 0.00060600  |
| H | -3.99450000  | -3.38300400 | -0.00087200 |
| F | 8.74707500   | 3.40064700  | -0.00028100 |
| F | 2.68157400   | 1.37932100  | -0.00004600 |
| C | -4.60486900  | -0.44365700 | -0.00019200 |
| C | -4.72286100  | 0.92671700  | -0.00013500 |
| S | -6.20851800  | -1.16826200 | -0.00006500 |
| C | -6.06178100  | 1.39425300  | 0.00002300  |
| C | -7.00800300  | 0.39752200  | 0.00008400  |
| C | -8.44242100  | 0.49679400  | 0.00026600  |
| C | -9.44960700  | -0.43842800 | 0.00061700  |
| O | -8.98443000  | 1.75546700  | 0.00006800  |
| C | -10.67790300 | 0.28899300  | 0.00063000  |
| H | -9.32822000  | -1.51291000 | 0.00085400  |
| C | -10.33831700 | 1.60855800  | 0.00028900  |
| H | -11.67878500 | -0.11906600 | 0.00086600  |
| H | -10.90535900 | 2.52662600  | 0.00017300  |
| F | -3.69556700  | 1.77840800  | -0.00021500 |
| F | -6.33378000  | 2.70204500  | 0.00011200  |
| H | 10.66740800  | 1.35453800  | 0.00022800  |

T2FSO-4

0 1

|   |             |             |             |
|---|-------------|-------------|-------------|
| C | -4.93527400 | -1.76171700 | 0.01047100  |
| C | -5.73480800 | -2.88396900 | 0.01993900  |
| C | -7.07679500 | -2.42809300 | 0.01898700  |
| C | -7.02691300 | -1.05108100 | 0.00903300  |
| O | -5.72105200 | -0.63987200 | 0.00374800  |
| H | -5.39749700 | -3.91119600 | 0.02710300  |
| C | -3.51491600 | -1.57067400 | 0.00660100  |
| C | -2.78931500 | -0.40089300 | 0.00164800  |
| C | -1.38502300 | -0.58840900 | -0.00072800 |
| C | -0.99159400 | -1.90750700 | 0.00234300  |
| F | -3.32124300 | 0.82253700  | -0.00063600 |
| C | 0.32912500  | -2.46379100 | 0.00091200  |
| C | 0.80668300  | -3.75671800 | 0.00012100  |
| O | 1.38117500  | -1.58709700 | 0.00004400  |
| C | 2.22089800  | -3.66834600 | -0.00124300 |
| C | 2.53388800  | -2.32623000 | -0.00130300 |
| H | 2.92337300  | -4.49023500 | -0.00199900 |



|   |              |             |             |
|---|--------------|-------------|-------------|
| C | 3.77525800   | -1.61009000 | -0.00240900 |
| C | 4.00203000   | -0.25251000 | 0.00073700  |
| C | 5.37261000   | 0.10740500  | -0.00133400 |
| C | 6.23710100   | -0.96330600 | -0.00610100 |
| C | 7.67087000   | -0.97747800 | -0.00976100 |
| C | 8.60221800   | -1.99216400 | -0.01900200 |
| O | 8.31207700   | 0.23272500  | -0.00310900 |
| C | 9.87819600   | -1.37298100 | -0.01784100 |
| C | 9.65826200   | -0.01442100 | -0.00809300 |
| H | 10.84005100  | -1.86669000 | -0.02345700 |
| C | 10.53694500  | 1.12339300  | -0.00246100 |
| C | 10.22661600  | 2.46276300  | 0.01101200  |
| C | 11.36787500  | 3.31483700  | 0.01335100  |
| C | 12.55213600  | 2.64508300  | 0.00183800  |
| F | 3.04520200   | 0.67697900  | 0.00538000  |
| F | 8.98830500   | 2.96085700  | 0.02149200  |
| S | -2.41399000  | -2.94324800 | 0.00826800  |
| S | 5.31507500   | -2.46152100 | -0.00795400 |
| S | 12.28329100  | 0.92637600  | -0.01267900 |
| H | 8.39503000   | -3.05330100 | -0.02599000 |
| H | 0.21207900   | -4.65974000 | 0.00033300  |
| H | -7.97010900  | -3.03708000 | 0.02514500  |
| F | 11.23808700  | 4.64590400  | 0.02602500  |
| F | 5.74946700   | 1.38719300  | 0.00103600  |
| F | -0.55038300  | 0.45221900  | -0.00563300 |
| C | -8.03765600  | -0.03410100 | 0.00353100  |
| C | -7.90162300  | 1.33460900  | -0.00474700 |
| S | -9.74694400  | -0.45158700 | 0.00721400  |
| C | -9.13166500  | 2.04037600  | -0.00819000 |
| C | -10.24505800 | 1.23454200  | -0.00266900 |
| C | -11.63692600 | 1.59549700  | -0.00418500 |
| C | -12.79856700 | 0.86089600  | -0.00182700 |
| O | -11.93897000 | 2.93218400  | -0.00886300 |
| C | -13.87264400 | 1.80122700  | -0.00523400 |
| H | -12.87611900 | -0.21762300 | 0.00171300  |
| C | -13.29677600 | 3.03614500  | -0.00945600 |
| H | -14.93139200 | 1.58369000  | -0.00467400 |
| H | -13.68574000 | 4.04266100  | -0.01306800 |
| F | -6.73514100  | 1.98252700  | -0.00935100 |
| F | -9.15829500  | 3.37578100  | -0.01628500 |
| H | 13.55064300  | 3.05594600  | 0.00086200  |

T2FSO-5

0 1

|   |              |             |            |
|---|--------------|-------------|------------|
| C | -8.45891600  | -1.44763100 | 0.00513000 |
| C | -9.44708900  | -2.40800400 | 0.00819300 |
| C | -10.68519200 | -1.71852400 | 0.00709100 |
| C | -10.38880300 | -0.37282700 | 0.00341800 |
| O | -9.03021500  | -0.20267200 | 0.00221700 |
| H | -9.30015400  | -3.47919400 | 0.01097700 |
| C | -7.02750400  | -1.51622100 | 0.00440500 |
| C | -6.10196900  | -0.49729900 | 0.00247800 |
| C | -4.75482300  | -0.93622200 | 0.00229600 |
| C | -4.60712600  | -2.30480800 | 0.00408600 |
| F | -6.40397600  | 0.80214800  | 0.00091300 |
| C | -3.41095700  | -3.09377500 | 0.00422800 |

|   |              |             |             |
|---|--------------|-------------|-------------|
| C | -3.18172400  | -4.45289100 | 0.00521000  |
| O | -2.21470700  | -2.42729600 | 0.00305700  |
| C | -1.77603700  | -4.62863000 | 0.00464000  |
| C | -1.21913300  | -3.36781100 | 0.00330100  |
| H | -1.23876300  | -5.56690000 | 0.00527100  |
| C | 0.13425100   | -2.89710600 | 0.00207200  |
| C | 0.61319000   | -1.60649100 | 0.00329900  |
| C | 2.02681700   | -1.51159800 | 0.00150300  |
| C | 2.67398700   | -2.72658300 | -0.00113700 |
| C | 4.07818000   | -3.01228100 | -0.00373400 |
| C | 4.79868800   | -4.18718600 | -0.00821500 |
| O | 4.93881900   | -1.94713100 | -0.00162100 |
| C | 6.16832500   | -3.82481200 | -0.00885400 |
| C | 6.21363000   | -2.44732500 | -0.00477800 |
| H | 7.01742800   | -4.49412800 | -0.01190900 |
| C | 7.29263000   | -1.50405000 | -0.00344900 |
| C | 7.25322000   | -0.12825900 | 0.00203700  |
| C | 8.52872500   | 0.48937700  | 0.00168300  |
| C | 9.58351900   | -0.39450700 | -0.00404900 |
| F | -0.15165300  | -0.51360600 | 0.00603800  |
| F | 6.13490100   | 0.59893700  | 0.00742200  |
| S | -6.19388800  | -3.06552000 | 0.00602700  |
| S | 1.48542500   | -4.02400000 | -0.00142600 |
| S | 8.96763400   | -2.04244000 | -0.00926200 |
| C | 10.99330900  | -0.13294500 | -0.00610800 |
| C | 12.10192900  | -0.95025400 | -0.01186500 |
| O | 11.39057400  | 1.17765500  | -0.00173000 |
| C | 13.23549600  | -0.09796600 | -0.01095100 |
| C | 12.75910400  | 1.19328700  | -0.00470600 |
| H | 14.27413300  | -0.39821400 | -0.01443000 |
| C | 13.40361900  | 2.47830200  | -0.00097700 |
| C | 12.84300800  | 3.73369200  | 0.00612600  |
| S | 15.15541000  | 2.61845600  | -0.00537000 |
| C | 13.80050100  | 4.78820500  | 0.00806800  |
| C | 15.09090900  | 4.35692200  | 0.00253400  |
| F | 11.53221600  | 3.98557100  | 0.01100000  |
| H | 12.10177000  | -2.03142100 | -0.01620700 |
| H | 4.39130500   | -5.18868400 | -0.01082400 |
| H | -3.93385100  | -5.22958600 | 0.00623000  |
| H | -11.67342600 | -2.15702200 | 0.00882600  |
| F | 13.41906800  | 6.07006700  | 0.01483900  |
| F | 8.65146100   | 1.81778600  | 0.00663500  |
| F | 2.63851300   | -0.32619800 | 0.00232500  |
| F | -3.74529100  | -0.06427500 | 0.00047700  |
| C | -11.20165900 | 0.80828300  | 0.00069900  |
| C | -10.82461100 | 2.13112200  | -0.00272800 |
| S | -12.95808100 | 0.70120300  | 0.00136500  |
| C | -11.90980500 | 3.04416300  | -0.00487100 |
| C | -13.14855200 | 2.44880800  | -0.00314200 |
| C | -14.45417300 | 3.05110900  | -0.00453900 |
| C | -15.72777900 | 2.53432100  | -0.00399300 |
| O | -14.51411600 | 4.42019400  | -0.00694300 |
| C | -16.61781100 | 3.65039500  | -0.00617600 |
| H | -15.99565800 | 1.48671100  | -0.00230800 |
| C | -15.83189800 | 4.76348000  | -0.00791500 |
| H | -17.69835800 | 3.62424100  | -0.00643900 |
| H | -16.03608400 | 5.82305100  | -0.00984500 |

|   |              |            |             |
|---|--------------|------------|-------------|
| F | -9.56169100  | 2.56174700 | -0.00408100 |
| F | -11.69939700 | 4.36318400 | -0.00834600 |
| H | 15.99256500  | 4.95095600 | 0.00261600  |

T2FSO-6

0 1

|   |              |             |             |
|---|--------------|-------------|-------------|
| C | -11.66189200 | -0.67268000 | 0.16100700  |
| C | -12.81494600 | -1.41588500 | 0.29098600  |
| C | -13.89567400 | -0.49941000 | 0.26309800  |
| C | -13.34628500 | 0.75596500  | 0.11803700  |
| O | -11.98238300 | 0.65479800  | 0.05520600  |
| H | -12.87676400 | -2.49030700 | 0.39502400  |
| C | -10.27198000 | -1.01972300 | 0.12041000  |
| C | -9.16921000  | -0.20361000 | 0.00717300  |
| C | -7.93272300  | -0.89524700 | 0.00297900  |
| C | -8.05026500  | -2.26234200 | 0.11303100  |
| F | -9.21568200  | 1.12596300  | -0.09110800 |
| C | -7.02685000  | -3.26499100 | 0.14274700  |
| C | -7.05788200  | -4.64002900 | 0.23301000  |
| O | -5.72713600  | -2.83996300 | 0.07193800  |
| C | -5.71096600  | -5.07947100 | 0.21775100  |
| C | -4.92692900  | -3.95028100 | 0.11828300  |
| H | -5.35984300  | -6.10043900 | 0.27540300  |
| C | -3.51009500  | -3.74382400 | 0.06030800  |
| C | -2.79932800  | -2.56630000 | 0.00087600  |
| C | -1.39367000  | -2.73786800 | -0.03920000 |
| C | -0.98445400  | -4.05200000 | -0.01176300 |
| C | 0.34204800   | -4.59341400 | -0.03858000 |
| C | 0.83313800   | -5.88124800 | -0.05497200 |
| O | 1.38463900   | -3.70555600 | -0.04953800 |
| C | 2.24596000   | -5.77793200 | -0.07649000 |
| C | 2.54486200   | -4.43246000 | -0.07268500 |
| H | 2.95692700   | -6.59232000 | -0.09291300 |
| C | 3.77888500   | -3.70427300 | -0.08514600 |
| C | 3.99310100   | -2.34449900 | -0.06701600 |
| C | 5.35981800   | -1.97169500 | -0.08302100 |
| C | 6.23427600   | -3.03441400 | -0.11384700 |
| F | -3.34617900  | -1.34984100 | -0.01716100 |
| F | 3.02762900   | -1.42469600 | -0.03670700 |
| S | -9.75159400  | -2.69727200 | 0.22428500  |
| S | -2.39315000  | -5.10332600 | 0.06603700  |
| S | 5.32611500   | -4.54127100 | -0.12218900 |
| C | 7.66704900   | -3.03521100 | -0.13772000 |
| C | 8.60630900   | -4.04209600 | -0.19733800 |
| O | 8.29914600   | -1.82108100 | -0.09328600 |
| C | 9.87665500   | -3.41485600 | -0.18863100 |
| C | 9.64764000   | -2.05732200 | -0.12446500 |
| H | 10.84170900  | -3.90089900 | -0.22583400 |
| C | 10.51797300  | -0.91939600 | -0.08514400 |
| C | 10.20623800  | 0.41959400  | -0.01910300 |
| S | 12.26644600  | -1.11334700 | -0.11656000 |
| C | 11.33362700  | 1.27777600  | 0.00698600  |
| C | 12.54275500  | 0.62216600  | -0.03821900 |
| F | 8.96597100   | 0.90906300  | 0.01947100  |
| H | 8.40616300   | -5.10360200 | -0.24368600 |
| H | 0.24809700   | -6.79049500 | -0.05394600 |

|   |              |             |             |
|---|--------------|-------------|-------------|
| H | -7.94235100  | -5.25799300 | 0.30209100  |
| H | -14.94842900 | -0.73335500 | 0.33986900  |
| F | 11.19055700  | 2.60259600  | 0.07104800  |
| F | 5.72529800   | -0.68892600 | -0.06986700 |
| F | -0.57214100  | -1.68876700 | -0.09938000 |
| F | -6.77592400  | -0.23920300 | -0.10080600 |
| C | 13.87217000  | 1.15919200  | -0.02849300 |
| C | 15.12134100  | 0.58012600  | -0.06526700 |
| O | 14.00031400  | 2.52156100  | 0.02849500  |
| C | 16.06232300  | 1.64061800  | -0.02927100 |
| H | 15.33666700  | -0.47835500 | -0.11250900 |
| C | 15.33827800  | 2.80971700  | 0.02790200  |
| H | 17.13992100  | 1.55391200  | -0.04418300 |
| C | 15.71424300  | 4.19616700  | 0.08414500  |
| C | 14.91528400  | 5.31427900  | 0.12807700  |
| S | 17.40324400  | 4.68142700  | 0.10495200  |
| C | 15.64408100  | 6.53705700  | 0.17676900  |
| C | 16.99444100  | 6.37097800  | 0.17069200  |
| H | 17.75996300  | 7.13182800  | 0.20106400  |
| F | 13.58060000  | 5.30108000  | 0.12609200  |
| F | 15.01565900  | 7.71674200  | 0.22271100  |
| C | -13.91399400 | 2.06944000  | 0.02683700  |
| C | -13.28847400 | 3.28312800  | -0.13951700 |
| S | -15.65337900 | 2.31673400  | 0.12410500  |
| C | -14.17323200 | 4.39020000  | -0.19007800 |
| C | -15.50095100 | 4.05813500  | -0.06392500 |
| C | -16.66128500 | 4.90732800  | -0.06786100 |
| C | -18.00734700 | 4.66062000  | 0.05995700  |
| O | -16.45405700 | 6.25256700  | -0.22717800 |
| C | -18.66120900 | 5.92668200  | -0.02600500 |
| H | -18.47268800 | 3.69451700  | 0.19912400  |
| C | -17.67633400 | 6.85226700  | -0.19908600 |
| H | -19.72317500 | 6.11886500  | 0.03368400  |
| H | -17.67027100 | 7.92518400  | -0.31397800 |
| F | -11.96918100 | 3.44970700  | -0.24950100 |
| F | -13.71128800 | 5.63338900  | -0.34853700 |
