# Supplementary material for: Folding oligomers of difluorinated thienylfurans: a DFT study
Source: Royal Society of Chemistry journal article supplement (doi:10.1039/b916415d), 2009-11-18
Supplement: b916415d.zip [file b916415d.zip]

Cartesian coordinates of MPWB1K/6-31G(d) optimized geometries  
all-cisoid C2FOS-n, and all-transoid T2FOS-n, n = 1-6.  
Charge and multiplicity are given first.

#### C2FOS-1

0 1

|   |             |             |             |
|---|-------------|-------------|-------------|
| C | -2.17847500 | -1.44768800 | 0.00026500  |
| C | -2.63204900 | -0.17951100 | -0.00001600 |
| O | -0.83277100 | -1.43323200 | 0.00020800  |
| C | -1.49443100 | 0.65657800  | -0.00003800 |
| C | -0.40875300 | -0.15438700 | 0.00006300  |
| C | 0.99820400  | 0.11034000  | 0.00007200  |
| C | 1.61230900  | 1.32848600  | 0.00018200  |
| S | 2.14536400  | -1.16956500 | -0.00023300 |
| C | 3.02003400  | 1.22365600  | 0.00023200  |
| H | 1.06947800  | 2.25820800  | 0.00036600  |
| C | 3.44654100  | -0.06361300 | -0.00008500 |
| H | 4.45806800  | -0.42761300 | -0.00012900 |
| F | -1.49425200 | 1.97549400  | -0.00019400 |
| F | -3.88298000 | 0.22866200  | -0.00013300 |
| H | 3.68571600  | 2.07060700  | 0.00041600  |
| H | -2.66211300 | -2.40289200 | 0.00031000  |

#### C2FOS-2

0 1

|   |             |             |             |
|---|-------------|-------------|-------------|
| C | -5.00075504 | -2.18717442 | -0.00034026 |
| C | -3.82734964 | -0.33597085 | -0.00046232 |
| C | -5.13569706 | 0.02128689  | 0.00059252  |
| C | -2.61643961 | 0.42252428  | -0.00085011 |
| C | -0.26894254 | 1.14961210  | -0.00090869 |
| C | -1.14580582 | 2.19924227  | -0.00156377 |
| O | -3.75353108 | -1.68167391 | -0.00107780 |
| C | -5.88737482 | -1.17286099 | 0.00054763  |
| C | -2.48635528 | 1.78273190  | -0.00152347 |
| H | -3.33039378 | 2.45089626  | -0.00186929 |
| F | -5.61751130 | 1.24833709  | 0.00142671  |
| S | -1.08696111 | -0.36369446 | -0.00068308 |
| C | 1.15504168  | 1.21113447  | -0.00045088 |
| C | 2.03221785  | 2.24807398  | 0.00045578  |
| O | 1.86122923  | 0.06064736  | -0.00074922 |
| C | 3.32371963  | 1.69584502  | 0.00067333  |
| C | 3.18054962  | 0.34547664  | -0.00007986 |
| C | 4.12041964  | -0.72934760 | -0.00021103 |
| C | 5.48370386  | -0.64508429 | -0.00121639 |
| S | 3.59311978  | -2.36569384 | 0.00126767  |
| C | 6.10111073  | -1.91352326 | -0.00084039 |
| H | 6.01325905  | 0.29257623  | -0.00219218 |
| C | 5.20379060  | -2.93089461 | 0.00041418  |
| H | 5.39988208  | -3.98786177 | 0.00087703  |
| F | 4.45970675  | 2.36314975  | 0.00150689  |
| F | -7.20041312 | -1.25188743 | 0.00130456  |
| F | 1.72771157  | 3.52970190  | 0.00101788  |
| H | -0.82597637 | 3.22762827  | -0.00200044 |
| H | 7.16807256  | -2.06180989 | -0.00158261 |
| H | -5.10141500 | -3.25314485 | -0.00069178 |

#### C2FOS-3

0 1

|   |             |             |             |
|---|-------------|-------------|-------------|
| C | 5.28035400  | 3.94636300  | 0.00036100  |
| C | 5.47669600  | 1.76381100  | 0.00024700  |
| C | 6.73193400  | 2.27638300  | 0.00049500  |
| O | 4.59882000  | 2.78580800  | 0.00016800  |
| C | 6.60135400  | 3.68178900  | 0.00056400  |
| F | 7.86062800  | 1.59555100  | 0.00064300  |
| C | 4.97937300  | 0.42460600  | 0.00008000  |
| C | 3.56558800  | -1.58577000 | -0.00017700 |
| C | 4.90173700  | -1.88022800 | -0.00015600 |
| C | 5.70808800  | -0.73192400 | -0.00001300 |
| H | 6.78457100  | -0.74652600 | 0.00002500  |
| C | 2.47528000  | -2.50320700 | -0.00032200 |
| C | 0.34223800  | -3.05483700 | -0.00042400 |
| C | 1.05494300  | -4.21235100 | -0.00060000 |
| C | -1.05607100 | -2.78265500 | -0.00037900 |
| C | -3.27337200 | -1.71942300 | -0.00020900 |
| C | -3.34283600 | -3.08632800 | -0.00043100 |
| O | 1.21338700  | -2.02332100 | -0.00025400 |
| C | 2.41367300  | -3.86080800 | -0.00053900 |
| C | -2.07865200 | -3.69237000 | -0.00052800 |
| H | -1.91749600 | -4.75685800 | -0.00070400 |
| F | 0.56347800  | -5.43425000 | -0.00079300 |
| S | 3.28878500  | 0.11189300  | -0.00001300 |
| S | -1.64476500 | -1.16573500 | -0.00011400 |
| C | -4.35903400 | -0.79641100 | -0.00004200 |
| C | -5.70741600 | -0.96281900 | 0.00008000  |
| O | -4.09738300 | 0.52819000  | 0.00005500  |
| C | -6.28131700 | 0.31875700  | 0.00024500  |
| C | -5.26004000 | 1.21380900  | 0.00023000  |
| C | -5.22613400 | 2.64114900  | 0.00032200  |
| C | -6.29195600 | 3.49587700  | 0.00087000  |
| S | -3.73557000 | 3.49828100  | -0.00035900 |
| C | -5.89637000 | 4.84981400  | 0.00074100  |
| H | -7.31440800 | 3.15787800  | 0.00135100  |
| C | -4.54829600 | 4.99963100  | 0.00010700  |
| H | -3.98250300 | 5.91373700  | -0.00010100 |
| F | -7.56855500 | 0.59904400  | 0.00038700  |
| F | 7.59497500  | 4.54359600  | 0.00078800  |
| F | 3.43570300  | -4.69147800 | -0.00066600 |
| F | -6.35442900 | -2.11002500 | 0.00004500  |
| H | 5.28048700  | -2.88788200 | -0.00024900 |
| H | -4.27433000 | -3.62627700 | -0.00052400 |
| H | -6.58617000 | 5.67717300  | 0.00111800  |
| H | 4.71125700  | 4.85324400  | 0.00032700  |

C2FOS-4

0 1

|   |            |             |             |
|---|------------|-------------|-------------|
| C | 2.92140000 | 5.12934300  | -0.78761200 |
| C | 4.48860400 | 3.64808200  | -0.39605600 |
| C | 5.08675700 | 4.86496700  | -0.41533300 |
| C | 4.07485000 | 5.81568100  | -0.66785600 |
| O | 3.17125100 | 3.81740200  | -0.62313300 |
| C | 4.98708700 | 2.32432200  | -0.19468400 |
| C | 5.22271800 | -0.10547300 | 0.08112700  |
| C | 6.41790100 | 0.55374500  | 0.17353000  |
| C | 4.99470200 | -1.50822300 | 0.18098700  |

|   |             |             |             |
|---|-------------|-------------|-------------|
| C | 3.73820800  | -3.31667700 | 0.20955200  |
| C | 5.02671500  | -3.72362900 | 0.35592000  |
| O | 3.72923400  | -1.97124900 | 0.10441500  |
| C | 5.82768200  | -2.57078600 | 0.33761300  |
| C | 6.28229200  | 1.94185300  | 0.01628600  |
| H | 7.10078600  | 2.64025600  | 0.05532800  |
| F | 6.36784900  | 5.11576000  | -0.23362700 |
| F | 5.44199600  | -4.96611500 | 0.49055500  |
| C | 2.50091900  | -4.01922400 | 0.15396700  |
| C | 0.12638500  | -4.63789000 | 0.02252100  |
| C | 0.95076400  | -5.72613200 | 0.12059900  |
| C | 2.30557700  | -5.37336900 | 0.19625100  |
| H | 3.11525100  | -6.07853200 | 0.27871100  |
| C | -1.29433400 | -4.62836600 | -0.07661800 |
| C | -3.26692800 | -3.65622200 | -0.20767100 |
| C | -3.47926500 | -4.99800000 | -0.24530400 |
| C | -4.14889700 | -2.53840100 | -0.23849900 |
| C | -5.13976300 | -0.28992700 | -0.17497300 |
| C | -6.07214100 | -1.27271200 | -0.36962900 |
| O | -1.93844600 | -3.44175400 | -0.10535300 |
| C | -2.22272900 | -5.61770600 | -0.16267100 |
| C | -5.50728800 | -2.55555700 | -0.40553300 |
| H | -6.06739400 | -3.46448000 | -0.54681200 |
| F | -4.64574800 | -5.60194600 | -0.33870900 |
| S | 3.91747800  | 0.97843000  | -0.20145900 |
| S | 1.01432200  | -3.16472400 | 0.02089300  |
| S | -3.55276700 | -0.93777000 | -0.03485500 |
| C | -5.36476700 | 1.11440700  | -0.08452100 |
| C | -6.48231900 | 1.87857100  | -0.19863800 |
| O | -4.31974300 | 1.93076900  | 0.17151000  |
| C | -6.09125000 | 3.21292200  | -0.00225200 |
| C | -4.75248500 | 3.20808800  | 0.22446200  |
| C | -3.81412700 | 4.24904600  | 0.49776400  |
| C | -4.06690500 | 5.58850600  | 0.59198200  |
| S | -2.15260200 | 3.90339400  | 0.77101800  |
| C | -2.90710400 | 6.33559600  | 0.88658900  |
| H | -5.04906400 | 6.00875900  | 0.45599100  |
| C | -1.80302400 | 5.55703500  | 1.01044400  |
| H | -0.79810200 | 5.86348200  | 1.23892600  |
| F | -6.87723300 | 4.26989000  | -0.03007200 |
| F | 4.25098000  | 7.11569900  | -0.76239300 |
| F | 7.13913200  | -2.52497800 | 0.44872100  |
| F | -1.98812600 | -6.91336500 | -0.16785800 |
| F | -7.70306300 | 1.45098300  | -0.44695000 |
| H | 7.35300200  | 0.04867900  | 0.34712300  |
| H | 0.58636200  | -6.73891100 | 0.13756300  |
| H | -7.12341600 | -1.07069000 | -0.48066500 |
| H | -2.89568600 | 7.40634400  | 1.00387400  |
| H | 1.90947200  | 5.41789400  | -0.98657700 |

2FOS-5

0 1

|   |             |             |             |
|---|-------------|-------------|-------------|
| C | 4.33839400  | -0.15494100 | -1.91377800 |
| C | 3.92889600  | -2.24517400 | -1.40803400 |
| C | 3.07636900  | -3.35336200 | -1.12001300 |
| C | 1.14888100  | -4.78139500 | -0.59117700 |
| C | -0.16009200 | -5.28499200 | -0.33835300 |

|   |             |             |             |
|---|-------------|-------------|-------------|
| C | -2.33381300 | -5.07772500 | -0.03923000 |
| C | 5.27372200  | -2.08158900 | -1.36074400 |
| C | 5.53296400  | -0.73399500 | -1.68375400 |
| C | 3.43494800  | -4.64920600 | -0.87852400 |
| C | 2.33261400  | -5.46789900 | -0.57976500 |
| C | -2.04004900 | -6.39865300 | 0.06880000  |
| C | -0.65417300 | -6.53205300 | -0.12003100 |
| O | 3.36580200  | -1.07042300 | -1.75237500 |
| O | -1.18689800 | -4.41062300 | -0.28780600 |
| H | 4.45741200  | -4.98551200 | -0.91335200 |
| C | -3.54264900 | -4.33428400 | 0.07200200  |
| C | -5.21824400 | -2.54347700 | 0.19483900  |
| C | -5.76614400 | -3.78752000 | 0.34853500  |
| C | -5.88660900 | -1.28637500 | 0.21094300  |
| C | -5.97451200 | 0.91237300  | 0.12987400  |
| C | -7.25206200 | 0.46613800  | 0.26117600  |
| O | -5.15386100 | -0.15897800 | 0.10092600  |
| C | -7.19575400 | -0.93578900 | 0.30980500  |
| C | -4.80879100 | -4.81059400 | 0.27773600  |
| H | -5.03245600 | -5.85956500 | 0.37560700  |
| F | 6.16736200  | -2.99514800 | -1.03690000 |
| F | -2.89660800 | -7.36843200 | 0.31400300  |
| F | -8.33646300 | 1.21132100  | 0.32789200  |
| C | -5.40499300 | 2.21364500  | 0.03156200  |
| C | -3.87910300 | 4.13095700  | -0.13632400 |
| C | -5.19574500 | 4.50330700  | -0.13247300 |
| C | -6.06693000 | 3.40920500  | -0.03787100 |
| H | -7.14096200 | 3.48345100  | -0.02103300 |
| C | -2.74191800 | 4.98172500  | -0.23715100 |
| C | -0.58517600 | 5.43010500  | -0.25367300 |
| C | -1.24097500 | 6.60357400  | -0.46098200 |
| C | 0.80076800  | 5.11506700  | -0.14965100 |
| C | 2.97878500  | 4.03472700  | 0.21897200  |
| C | 3.09559600  | 5.34803800  | -0.14741000 |
| O | -1.50482000 | 4.45024800  | -0.11871600 |
| C | -2.61365500 | 6.31687400  | -0.45273000 |
| C | 1.85410000  | 5.96482600  | -0.35695300 |
| H | 1.72569300  | 6.99411700  | -0.64686800 |
| F | -0.69040500 | 7.78773000  | -0.63448800 |
| S | 1.38043800  | -3.12095300 | -0.97393900 |
| S | -3.51608900 | -2.61832000 | -0.03624700 |
| S | -3.69797900 | 2.42458900  | -0.01763900 |
| S | 1.33180900  | 3.54304400  | 0.30489100  |
| C | 4.03231400  | 3.11865900  | 0.50931200  |
| C | 5.38726800  | 3.21726300  | 0.45217900  |
| O | 3.71968600  | 1.87840100  | 0.94592000  |
| C | 5.91042600  | 1.98493800  | 0.87482700  |
| C | 4.85555800  | 1.18470900  | 1.17349400  |
| C | 4.76298700  | -0.16670400 | 1.62059600  |
| C | 5.79004300  | -1.04269800 | 1.83157100  |
| S | 3.24036700  | -0.89888900 | 1.92762600  |
| C | 5.33576300  | -2.31582500 | 2.23592000  |
| H | 6.82465800  | -0.78036100 | 1.69005900  |
| C | 3.98289800  | -2.38096500 | 2.32941400  |
| H | 3.37555500  | -3.22667300 | 2.59824600  |
| F | 7.18580100  | 1.67113100  | 0.96330000  |
| F | 6.72128100  | -0.16562500 | -1.71763900 |

|   |             |             |             |
|---|-------------|-------------|-------------|
| F | 0.03722600  | -7.65264400 | -0.09206400 |
| F | -8.21360800 | -1.76214900 | 0.43032900  |
| F | -3.59516800 | 7.17856200  | -0.62043200 |
| F | 6.08374000  | 4.26925900  | 0.07337800  |
| H | 2.39435800  | -6.52040300 | -0.35920000 |
| H | -6.81956300 | -3.94609900 | 0.50598400  |
| H | -5.51438000 | 5.52999500  | -0.19856200 |
| H | 4.04327400  | 5.84611000  | -0.25790900 |
| H | 5.98764300  | -3.14648800 | 2.44824400  |
| H | 4.04293200  | 0.83935800  | -2.18395200 |

2FOS-6

0 1

|   |             |             |             |
|---|-------------|-------------|-------------|
| C | 4.45136400  | 0.54216900  | -1.75786400 |
| C | 4.30547200  | -1.87692600 | -1.36318800 |
| C | 3.86425500  | -3.21182000 | -1.13392700 |
| C | 2.36619700  | -4.77360700 | -0.73130300 |
| C | 1.05321000  | -5.27233800 | -0.49442000 |
| C | -1.36966800 | -5.56279400 | -0.17096100 |
| C | -2.78198300 | -5.40507400 | -0.05942100 |
| C | -4.68618600 | -4.29499600 | -0.04979400 |
| C | 2.83090600  | 3.66307800  | -2.07905500 |
| C | 4.08849500  | 4.14104400  | -2.14567400 |
| C | 4.95086700  | 3.03058400  | -2.03463000 |
| C | 4.16376600  | 1.93263400  | -1.91250600 |
| C | 3.57435000  | -5.39064700 | -0.82103100 |
| C | 4.52817500  | -4.39542500 | -1.07615400 |
| C | 5.59730000  | -1.43588900 | -1.46000000 |
| C | 5.67998000  | -0.05259600 | -1.68505700 |
| C | 0.70257800  | -6.57380400 | -0.25752500 |
| C | -0.67549600 | -6.73956200 | -0.07270600 |
| C | -4.98623500 | -5.60915400 | 0.12717400  |
| C | -3.77681300 | -6.31454700 | 0.11923300  |
| O | 2.55342600  | -3.44987900 | -0.91627000 |
| O | -3.34344100 | -4.17956200 | -0.15895800 |
| O | 2.87570200  | 2.32640500  | -1.94199700 |
| H | 6.60195700  | 0.49638100  | -1.77218100 |
| H | 1.41739000  | -7.37758400 | -0.22290200 |
| C | -5.51933000 | -3.14109100 | -0.12928400 |
| C | -6.45945500 | -0.86859700 | -0.23144400 |
| C | -7.42274200 | -1.84104500 | -0.22839500 |
| C | -6.67920800 | 0.53793600  | -0.29811500 |
| C | -6.09186900 | 2.66079700  | -0.25180600 |
| C | -7.43556500 | 2.62215800  | -0.45299900 |
| O | -5.64116300 | 1.39071500  | -0.15992800 |
| C | -7.80936400 | 1.27135500  | -0.48316100 |
| C | -6.88845500 | -3.13371300 | -0.17031200 |
| H | -7.48308900 | -4.03074200 | -0.16013800 |
| H | 1.86569300  | 4.12493300  | -2.11434000 |
| F | 6.26825800  | 3.05820600  | -2.05066700 |
| F | 3.80974700  | -6.68093800 | -0.69288700 |
| F | -6.18587000 | -6.13032900 | 0.27873500  |
| F | -8.23842600 | 3.65627700  | -0.59393400 |
| C | -5.17477600 | 3.74350500  | -0.12559700 |
| C | -3.18848500 | 5.15699000  | 0.18941400  |
| C | -4.32460900 | 5.88599600  | -0.03539800 |
| C | -5.45700600 | 5.08037400  | -0.21439700 |

|   |             |             |             |
|---|-------------|-------------|-------------|
| H | -6.44604400 | 5.46059000  | -0.40273300 |
| C | -1.87107600 | 5.65664700  | 0.39559200  |
| C | 0.29340800  | 5.46321100  | 0.75797100  |
| C | 0.02627400  | 6.78987200  | 0.63548400  |
| C | 1.49516000  | 4.73006400  | 0.97472500  |
| C | 3.16021200  | 2.96041900  | 1.33312100  |
| C | 3.72574700  | 4.20187800  | 1.22189900  |
| O | -0.86461200 | 4.78389500  | 0.61213900  |
| C | -1.35303800 | 6.91328800  | 0.40467300  |
| C | 2.77506200  | 5.21305400  | 1.01386900  |
| H | 3.01118700  | 6.25674600  | 0.89110100  |
| F | 0.89983000  | 7.77170400  | 0.71342700  |
| S | 3.17704200  | -0.59410400 | -1.56087900 |
| S | -0.32039400 | -4.23425200 | -0.48743200 |
| S | -4.87765500 | -1.54448000 | -0.16262100 |
| S | -3.50538800 | 3.46573900  | 0.18218500  |
| S | 1.44843800  | 3.02517800  | 1.19516300  |
| C | 3.82886300  | 1.71542500  | 1.51624200  |
| C | 5.12961600  | 1.34799200  | 1.39388900  |
| O | 3.10708400  | 0.61855200  | 1.83596100  |
| C | 5.19303800  | -0.03328200 | 1.63444200  |
| C | 3.92799200  | -0.45043400 | 1.89756800  |
| C | 3.37675300  | -1.73751700 | 2.17701900  |
| C | 4.05651500  | -2.91767300 | 2.29443300  |
| S | 1.68601100  | -1.96510600 | 2.37847300  |
| C | 3.20050600  | -4.00754500 | 2.55747300  |
| H | 5.12638500  | -2.98845500 | 2.19455000  |
| C | 1.89640900  | -3.63866900 | 2.63456700  |
| H | 1.04128000  | -4.26202000 | 2.82451200  |
| F | 6.27270700  | -0.78640100 | 1.57239200  |
| F | 4.46596400  | 5.39648600  | -2.26233100 |
| F | 5.82367100  | -4.57498000 | -1.23558900 |
| F | -3.63787600 | -7.61703800 | 0.25604100  |
| F | -9.02837600 | 0.80603700  | -0.66071500 |
| F | -2.01920300 | 8.03481100  | 0.22478100  |
| F | 6.13305000  | 2.12751700  | 1.04638600  |
| H | 6.44846500  | -2.08774300 | -1.35966600 |
| H | -1.14643500 | -7.68787800 | 0.12041200  |
| H | -8.47613300 | -1.62347100 | -0.26633000 |
| H | -4.33161700 | 6.96203400  | -0.07028600 |
| H | 4.78813300  | 4.36705100  | 1.28309800  |
| H | 3.54004800  | -5.02096500 | 2.69237200  |

T2FOS-1

0 1

|   |             |             |             |
|---|-------------|-------------|-------------|
| C | 0.41694700  | 0.38482300  | 0.00000800  |
| C | 1.37565600  | -0.57125400 | -0.00004500 |
| C | 2.62166900  | 0.09232800  | -0.00003900 |
| C | 2.35184900  | 1.41153300  | 0.00001800  |
| O | 1.01731000  | 1.59154600  | 0.00004600  |
| C | -1.01408500 | 0.33228000  | 0.00003000  |
| C | -1.87974800 | 1.38550500  | 0.00009400  |
| C | -3.23124200 | 0.97575800  | 0.00010000  |
| C | -3.36654100 | -0.37279400 | 0.00004200  |
| S | -1.85546200 | -1.16829100 | -0.00002700 |
| F | 1.17806400  | -1.87515700 | -0.00009200 |
| H | -1.54799200 | 2.41022600  | 0.00013500  |

|   |             |             |             |
|---|-------------|-------------|-------------|
| F | 3.80219000  | -0.48858100 | -0.00008000 |
| H | -4.06595200 | 1.65662200  | 0.00014700  |
| H | 2.96712900  | 2.28795000  | 0.00004300  |
| H | -4.27359100 | -0.94993800 | 0.00003400  |

T2FOS-2

0 1

|   |             |             |             |
|---|-------------|-------------|-------------|
| C | -6.20989900 | -1.43168200 | -0.00006300 |
| C | -6.33541400 | -0.09036200 | -0.00007900 |
| O | -4.90344800 | -1.75549500 | -0.00004200 |
| C | -5.02545000 | 0.43419600  | -0.00006700 |
| C | -4.17516000 | -0.62096100 | -0.00004400 |
| C | -2.75032100 | -0.73108700 | -0.00002500 |
| C | -2.01601600 | -1.88162300 | -0.00000200 |
| C | -0.63214800 | -1.64237000 | 0.00001200  |
| C | -0.32638900 | -0.31149700 | 0.00000000  |
| C | 0.97745600  | 0.26616700  | 0.00001000  |
| C | 1.43107800  | 1.54512500  | 0.00000200  |
| O | 2.04373900  | -0.56404500 | 0.00003100  |
| C | 2.83447500  | 1.48411700  | 0.00002000  |
| C | 3.17586600  | 0.17099800  | 0.00003800  |
| C | 4.43288600  | -0.50796000 | 0.00006000  |
| C | 4.64756700  | -1.85592100 | 0.00007700  |
| C | 6.01987300  | -2.18536400 | 0.00009300  |
| C | 6.81872600  | -1.08997000 | 0.00008500  |
| S | -1.74419600 | 0.66594700  | -0.00002900 |
| S | 5.91905300  | 0.36055500  | 0.00007500  |
| F | -4.68732100 | 1.70779500  | -0.00007600 |
| F | 3.66669800  | 2.50519100  | 0.00002000  |
| H | -2.46756000 | -2.85916200 | 0.00000400  |
| H | 3.84411100  | -2.57308100 | 0.00007500  |
| F | -7.44549300 | 0.61494400  | -0.00010200 |
| F | 0.68929800  | 2.63295600  | -0.00001800 |
| H | 0.12065800  | -2.41210400 | 0.00003100  |
| H | 6.39571500  | -3.19487100 | 0.00010500  |
| H | -6.91747100 | -2.23541400 | -0.00006400 |
| H | 7.89309200  | -1.05188100 | 0.00009200  |

T2FOS-3

0 1

|   |             |             |             |
|---|-------------|-------------|-------------|
| C | -9.59854300 | -2.19405100 | -0.00011600 |
| C | -9.90410800 | -0.88212500 | -0.00012700 |
| O | -8.25980700 | -2.33896700 | -0.00009300 |
| C | -8.67731300 | -0.18554900 | -0.00011200 |
| C | -7.69230100 | -1.11628600 | -0.00009100 |
| C | -6.26566800 | -1.02442800 | -0.00006900 |
| C | -5.36899400 | -2.05388500 | -0.00004700 |
| C | -4.03532800 | -1.61260700 | -0.00003000 |
| C | -3.92926300 | -0.25098800 | -0.00004000 |
| C | -2.73220800 | 0.52356000  | -0.00002900 |
| C | -2.49644500 | 1.86017600  | -0.00003500 |
| O | -1.54507200 | -0.12021800 | -0.00000800 |
| C | -1.10310200 | 2.03239500  | -0.00001700 |
| C | -0.54910200 | 0.79237800  | 0.00000000  |
| C | 0.79859500  | 0.32733700  | 0.00002200  |
| C | 1.22534400  | -0.97094900 | 0.00003900  |
| C | 2.62432100  | -1.08320200 | 0.00005400  |

|   |              |             |             |
|---|--------------|-------------|-------------|
| C | 3.25285500   | 0.13000900  | 0.00004900  |
| S | -5.47668200  | 0.50543800  | -0.00006600 |
| S | 2.12255800   | 1.42952700  | 0.00003700  |
| C | 4.65826400   | 0.37135000  | 0.00005700  |
| C | 5.40637200   | 1.50368500  | 0.00005500  |
| O | 5.49294200   | -0.69091000 | 0.00007000  |
| C | 6.75399600   | 1.10631200  | 0.00006800  |
| C | 6.76911800   | -0.25000600 | 0.00007800  |
| C | 7.82197600   | -1.21606000 | 0.00009400  |
| C | 7.69488600   | -2.57469000 | 0.00011000  |
| S | 9.47721800   | -0.74423100 | 0.00011700  |
| C | 8.94188000   | -3.23543800 | 0.00010800  |
| C | 9.98821200   | -2.37297300 | 0.00008300  |
| H | 11.03836000  | -2.60307200 | 0.00006800  |
| F | -8.51377800  | 1.12231600  | -0.00011700 |
| F | -0.45092500  | 3.17576600  | -0.00001600 |
| F | 7.80786100   | 1.89591700  | 0.00007100  |
| H | -5.67082500  | -3.08760500 | -0.00004400 |
| H | 0.54533000   | -1.80595500 | 0.00003600  |
| H | 6.73882400   | -3.07038100 | 0.00011400  |
| F | -11.09924400 | -0.33359700 | -0.00014800 |
| F | -3.41213000  | 2.80623800  | -0.00005500 |
| F | 4.94873200   | 2.73828000  | 0.00004300  |
| H | -3.17729400  | -2.26323600 | -0.00001300 |
| H | 3.16233100   | -2.01598600 | 0.00006600  |
| H | 9.05484600   | -4.30670000 | 0.00011000  |
| H | -10.19090500 | -3.08611600 | -0.00012000 |

T2FOS-4

0 1

|   |             |             |             |
|---|-------------|-------------|-------------|
| C | 10.85518500 | 2.11019200  | -0.00009000 |
| C | 12.01489000 | 1.40958900  | -0.00011800 |
| C | 13.06645000 | 2.35067400  | -0.00011900 |
| C | 12.48938700 | 3.56796300  | -0.00009000 |
| O | 11.15072700 | 3.42529700  | -0.00007300 |
| C | 9.47921200  | 1.72384800  | -0.00007500 |
| C | 8.39296400  | 2.55042100  | -0.00003900 |
| C | 7.17700400  | 1.84827100  | -0.00003300 |
| C | 7.34919400  | 0.49331200  | -0.00006400 |
| C | 6.32475700  | -0.49854400 | -0.00006700 |
| C | 6.34069700  | -1.85600800 | -0.00009000 |
| O | 5.03796100  | -0.08730500 | -0.00004300 |
| C | 5.00334600  | -2.28382400 | -0.00007900 |
| C | 4.22862600  | -1.16872300 | -0.00005000 |
| C | 2.81869700  | -0.95889000 | -0.00002900 |
| C | 2.16579500  | 0.24177300  | -0.00000200 |
| C | 0.76993200  | 0.10122100  | 0.00001200  |
| C | 0.36955700  | -1.20548100 | -0.00000400 |
| C | -0.96998400 | -1.69257300 | 0.00000300  |
| C | -1.50592400 | -2.94040500 | -0.00000600 |
| O | -1.97872100 | -0.79418400 | 0.00002300  |
| C | -2.90189200 | -2.78807600 | 0.00000900  |
| C | -3.15626400 | -1.45461800 | 0.00002700  |
| C | -4.36349600 | -0.69683400 | 0.00004600  |
| C | -4.48780900 | 0.66374000  | 0.00006200  |
| C | -5.82592600 | 1.08768900  | 0.00007700  |
| C | -6.71084700 | 0.04623500  | 0.00007300  |



|   |              |             |             |
|---|--------------|-------------|-------------|
| S | 9.01754300   | 0.06561000  | -0.00010100 |
| S | 1.71492300   | -2.28129500 | -0.00003700 |
| S | -5.90108000  | -1.47385900 | 0.00005100  |
| C | -8.13469200  | 0.12170900  | 0.00008400  |
| C | -9.11151700  | -0.82076000 | 0.00008300  |
| O | -8.71758300  | 1.34039300  | 0.00010000  |
| C | -10.33985500 | -0.14029600 | 0.00009800  |
| C | -10.05947500 | 1.18716900  | 0.00010800  |
| C | -10.87726900 | 2.35816000  | 0.00012500  |
| C | -10.45653400 | 3.65618400  | 0.00013500  |
| S | -12.59531200 | 2.25750800  | 0.00013500  |
| C | -11.52954800 | 4.57276400  | 0.00014900  |
| C | -12.73844800 | 3.95901000  | 0.00014800  |
| H | -13.71315900 | 4.41249100  | 0.00015600  |
| F | 12.13136800  | 0.09719500  | -0.00014100 |
| F | 4.57475700   | -3.52837800 | -0.00009400 |
| F | -3.80528700  | -3.74581100 | 0.00000700  |
| F | -11.54057000 | -0.68090600 | 0.00010200  |
| H | 8.47911700   | 3.62377400  | -0.00001800 |
| H | 2.68510700   | 1.18509600  | 0.00000600  |
| H | -3.63815600  | 1.32532300  | 0.00006200  |
| H | -9.41497400  | 3.93008600  | 0.00013300  |
| F | 14.35069000  | 2.06794000  | -0.00014300 |
| F | 7.41294200   | -2.61964600 | -0.00011700 |
| F | -0.83488000  | -4.07257300 | -0.00002500 |
| F | -8.93139400  | -2.12522000 | 0.00007000  |
| H | 6.20493900   | 2.31128600  | -0.00000700 |
| H | 0.07341300   | 0.92242500  | 0.00003300  |
| H | -6.14080700  | 2.11744600  | 0.00009000  |
| H | -11.40665700 | 5.64292000  | 0.00015800  |
| H | 12.87903200  | 4.56536900  | -0.00008000 |

T2FOS-5

0 1

|   |             |             |             |
|---|-------------|-------------|-------------|
| C | 7.69998400  | -0.99634100 | -0.00005800 |
| C | 8.68099200  | -1.93530600 | -0.00005800 |
| C | 9.90617900  | -1.25032600 | -0.00005300 |
| C | 9.62012400  | 0.07690900  | -0.00005000 |
| O | 8.27726300  | 0.22467300  | -0.00005300 |
| C | 10.42958500 | 1.25036800  | -0.00004500 |
| C | 9.99727800  | 2.54606200  | -0.00004100 |
| C | 11.05376000 | 3.47103200  | -0.00003600 |
| C | 12.28002900 | 2.87163200  | -0.00003600 |
| C | 13.55495300 | 3.51801200  | -0.00003000 |
| C | 14.82900900 | 3.05655500  | -0.00002300 |
| O | 13.58916500 | 4.86540800  | -0.00003000 |
| C | 15.67722900 | 4.18451500  | -0.00001800 |
| C | 14.87416700 | 5.26621100  | -0.00002300 |
| C | 6.27684800  | -1.07599200 | -0.00006000 |
| C | 5.39134000  | -0.03481300 | -0.00005200 |
| C | 4.05385200  | -0.45928800 | -0.00005500 |
| C | 3.93041400  | -1.82013200 | -0.00006600 |
| C | 2.72203600  | -2.57582400 | -0.00007000 |
| C | 2.46339100  | -3.90845600 | -0.00008200 |
| O | 1.54674700  | -1.91152400 | -0.00005900 |
| C | 1.06671400  | -4.05612400 | -0.00007800 |
| C | 0.53516800  | -2.80639300 | -0.00006300 |

|   |              |             |             |
|---|--------------|-------------|-------------|
| C | -0.80206400  | -2.31318300 | -0.00005100 |
| C | -1.19432300  | -1.00405600 | -0.00003400 |
| C | -2.58909700  | -0.85476800 | -0.00002200 |
| C | -3.24942300  | -2.05149800 | -0.00003000 |
| C | -4.66062600  | -2.25133100 | -0.00002000 |
| C | -5.44369300  | -3.36067200 | -0.00002600 |
| O | -5.46187800  | -1.16388300 | 0.00000100  |
| C | -6.77769000  | -2.92322000 | -0.00000800 |
| C | -6.75182400  | -1.56554300 | 0.00000900  |
| C | -7.76768900  | -0.56587700 | 0.00003100  |
| C | -7.58258800  | 0.78781600  | 0.00004700  |
| C | -8.79057000  | 1.50153000  | 0.00006800  |
| C | -9.88661800  | 0.68554100  | 0.00006900  |
| S | 12.14930000  | 1.15495500  | -0.00004300 |
| S | 5.46808500   | -2.59672900 | -0.00007400 |
| S | -2.15387300  | -3.38082900 | -0.00005500 |
| S | -9.44002500  | -0.97806800 | 0.00004000  |
| C | -11.25451100 | 1.08689500  | 0.00008900  |
| C | -12.42519900 | 0.40051100  | 0.00009300  |
| O | -11.53442900 | 2.40813900  | 0.00010800  |
| C | -13.45974700 | 1.35103900  | 0.00011600  |
| C | -12.87410600 | 2.57517700  | 0.00012500  |
| C | -13.39202200 | 3.90615300  | 0.00014700  |
| C | -12.67538400 | 5.06757300  | 0.00015400  |
| S | -15.08444400 | 4.21535800  | 0.00016500  |
| C | -13.50043900 | 6.21219300  | 0.00017800  |
| C | -14.82064500 | 5.90225100  | 0.00019000  |
| H | -15.66020000 | 6.57371100  | 0.00021000  |
| F | 15.20052400  | 1.79228400  | -0.00002000 |
| F | 8.50471600   | -3.23998600 | -0.00006100 |
| F | 0.39085400   | -5.18532100 | -0.00008600 |
| F | -7.85544000  | -3.67902800 | -0.00000600 |
| F | -14.75443800 | 1.10931900  | 0.00012800  |
| H | 10.92944200  | 4.54064100  | -0.00003200 |
| H | 5.70574200   | 0.99509200  | -0.00004300 |
| H | -0.49287900  | -0.18707800 | -0.00002900 |
| H | -6.60583700  | 1.24087700  | 0.00004400  |
| H | -11.59858400 | 5.08623200  | 0.00014300  |
| F | 16.99186300  | 4.15685200  | -0.00001100 |
| F | 11.10948300  | -1.78368500 | -0.00005000 |
| F | 3.36419700   | -4.86846500 | -0.00009400 |
| F | -5.02388300  | -4.60812200 | -0.00004400 |
| F | -12.55338700 | -0.90970300 | 0.00007900  |
| H | 8.95345300   | 2.81056800  | -0.00004200 |
| H | 3.20375600   | 0.20165900  | -0.00004800 |
| H | -3.10268800  | 0.09166200  | -0.00000700 |
| H | -8.86537800  | 2.57561500  | 0.00008400  |
| H | -13.12752100 | 7.22275800  | 0.00018800  |
| H | 15.06188000  | 6.32046400  | -0.00002300 |

T2FOS-6

0 1

|   |            |             |             |
|---|------------|-------------|-------------|
| C | 4.22569700 | -3.59616400 | -0.00009200 |
| C | 4.99300900 | -4.71650900 | -0.00014900 |
| C | 6.33319600 | -4.29724100 | -0.00014400 |
| C | 6.32578200 | -2.93956600 | -0.00008400 |

|   |              |             |             |
|---|--------------|-------------|-------------|
| O | 5.04180900   | -2.52004400 | -0.00005300 |
| C | 7.35543700   | -1.95392800 | -0.00005200 |
| C | 7.18925700   | -0.59761300 | 0.00002400  |
| C | 8.40688900   | 0.09910700  | 0.00003600  |
| C | 9.49149200   | -0.73223800 | -0.00003000 |
| C | 10.86443700  | -0.35025000 | -0.00003700 |
| C | 12.02532000  | -1.05463600 | -0.00007700 |
| O | 11.16428200  | 0.96688800  | 0.00000500  |
| C | 13.07354500  | -0.12117300 | -0.00005800 |
| C | 12.50702400  | 1.11291600  | -0.00000700 |
| C | 2.81766800   | -3.37521600 | -0.00007000 |
| C | 2.17695100   | -2.16799200 | -0.00001000 |
| C | 0.78002100   | -2.29433100 | -0.00000700 |
| C | 0.36663800   | -3.59712800 | -0.00006300 |
| C | 13.04871400  | 2.43192900  | 0.00002900  |
| C | 12.35664900  | 3.60984200  | 0.00008100  |
| C | 13.19801000  | 4.73456100  | 0.00010600  |
| C | 14.52234000  | 4.40317900  | 0.00007400  |
| C | 15.64123700  | 5.29299300  | 0.00008700  |
| C | 16.98082100  | 5.08977400  | 0.00007300  |
| O | 15.40987600  | 6.62042000  | 0.00012400  |
| C | 17.59146200  | 6.36231200  | 0.00010300  |
| C | 16.59147100  | 7.26519300  | 0.00013400  |
| H | 16.56898100  | 8.33577900  | 0.00016200  |
| C | -0.97806900  | -4.06939200 | -0.00007500 |
| C | -1.52849100  | -5.31100900 | -0.00010900 |
| O | -1.97606000  | -3.15943900 | -0.00004600 |
| C | -2.92256600  | -5.14245300 | -0.00009800 |
| C | -3.16142900  | -3.80602200 | -0.00005900 |
| C | -4.35707900  | -3.03060700 | -0.00003600 |
| C | -4.45536600  | -1.66775700 | -0.00000400 |
| C | -5.78477000  | -1.21862700 | 0.00001200  |
| C | -6.68919900  | -2.24346300 | -0.00000700 |
| C | -8.11053700  | -2.13781600 | 0.00000200  |
| C | -9.10885000  | -3.05861200 | -0.00000100 |
| O | -8.66551600  | -0.90643600 | 0.00001800  |
| C | -10.32108800 | -2.35175300 | 0.00001400  |
| C | -10.01105400 | -1.02950400 | 0.00002500  |
| C | -10.79964100 | 0.15739300  | 0.00004000  |
| C | -10.34566700 | 1.44627800  | 0.00004800  |
| C | -11.38539400 | 2.38873800  | 0.00006200  |
| C | -12.62354300 | 1.81068300  | 0.00006700  |
| S | 14.75010900  | 2.69695800  | 0.00000900  |
| S | 9.02191300   | -2.38947200 | -0.00011100 |
| S | 1.70093500   | -4.68664400 | -0.00012300 |
| S | -5.90847400  | -3.77897400 | -0.00004700 |
| S | -12.52084000 | 0.09111100  | 0.00004900  |
| C | -13.88403900 | 2.47734700  | 0.00008300  |
| C | -15.16817500 | 2.03801900  | 0.00009200  |
| O | -13.89563500 | 3.82771400  | 0.00009100  |
| C | -15.99258200 | 3.17571300  | 0.00010700  |
| C | -15.17499400 | 4.25869500  | 0.00010600  |
| C | -15.41634000 | 5.66672400  | 0.00011600  |
| C | -14.48247800 | 6.66180500  | 0.00011200  |
| S | -17.01299800 | 6.30853500  | 0.00013000  |
| C | -15.06202600 | 7.94824100  | 0.00012600  |
| C | -16.41766700 | 7.90865700  | 0.00014000  |

|   |              |             |             |
|---|--------------|-------------|-------------|
| H | -17.10620400 | 8.73425700  | 0.00015400  |
| F | 17.59036000  | 3.92145800  | 0.00003900  |
| F | 12.13579900  | -2.36612100 | -0.00012400 |
| F | 4.55487400   | -5.95759900 | -0.00019900 |
| F | -3.83722700  | -6.08917100 | -0.00012100 |
| F | -11.53327300 | -2.86439000 | 0.00001800  |
| F | -17.30918700 | 3.19529400  | 0.00012000  |
| H | 12.85414700  | 5.75508400  | 0.00014700  |
| H | 8.49682400   | 1.17207200  | 0.00009300  |
| H | 2.70570500   | -1.22995500 | 0.00003000  |
| H | -3.59328300  | -1.02257300 | 0.00000700  |
| H | -9.29750800  | 1.69309300  | 0.00004300  |
| H | -13.42346000 | 6.46606600  | 0.00010100  |
| F | 18.88579800  | 6.59399500  | 0.00010100  |
| F | 14.36390900  | -0.38257000 | -0.00008300 |
| F | 7.40149400   | -5.06606200 | -0.00018900 |
| F | -0.87041600  | -6.45066400 | -0.00014300 |
| F | -8.95705600  | -4.36640600 | -0.00001500 |
| F | -15.55761700 | 0.78039800  | 0.00008800  |
| H | 11.28059900  | 3.65153300  | 0.00010000  |
| H | 6.21908700   | -0.13066900 | 0.00006900  |
| H | 0.09155900   | -1.46636400 | 0.00003600  |
| H | -6.07982000  | -0.18306100 | 0.00003700  |
| H | -11.24174500 | 3.45583500  | 0.00007100  |
| H | -14.49450100 | 8.86380000  | 0.00012700  |
