# Supplementary material for: Folding oligomers of difluorinated thienylfurans: a DFT study
Source: Royal Society of Chemistry journal article supplement (doi:10.1039/b916415d), 2009-11-18
Supplement: b916415d.zip [file b916415d.zip]

Cartesian coordinates of B3LYP/6-31G(d) optimized geometries  
all-cisoid CFSFO-n, and all-transoid TFSFO-n, n = 1-6.  
Charge and multiplicity are given first.

CFSFO-1

|     |             |             |             |
|-----|-------------|-------------|-------------|
| 0 1 |             |             |             |
| C   | 2.57335100  | -1.21266400 | 0.00009700  |
| C   | 0.65617300  | -0.10957900 | 0.00003700  |
| C   | 1.64142100  | 0.84730300  | 0.00010800  |
| C   | 2.86229500  | 0.11777400  | 0.00012000  |
| O   | 1.21295900  | -1.36006200 | -0.00000100 |
| C   | -0.78033700 | -0.03382800 | -0.00003300 |
| C   | -3.24528300 | -0.47122000 | 0.00007700  |
| C   | -2.96407500 | 0.86685700  | 0.00004500  |
| C   | -1.56459500 | 1.09624300  | 0.00002800  |
| S   | -1.80983000 | -1.44926700 | -0.00039200 |
| H   | 3.16803600  | -2.11078900 | 0.00010400  |
| H   | -4.21606900 | -0.94740000 | 0.00018200  |
| F   | -1.03903400 | 2.33598200  | 0.00014600  |
| F   | 4.08563700  | 0.65767100  | 0.00016800  |
| H   | -3.70041200 | 1.66117200  | 0.00015900  |
| H   | 1.50892700  | 1.91758400  | 0.00013500  |

CFSFO-2

|     |             |             |             |
|-----|-------------|-------------|-------------|
| 0 1 |             |             |             |
| C   | -2.84389500 | 0.32675200  | -0.00008200 |
| C   | -0.46688800 | 1.14937600  | -0.00005500 |
| C   | 0.95836700  | 1.25706600  | -0.00006700 |
| C   | 3.04267200  | 0.48062000  | 0.00001900  |
| C   | 4.01466300  | -0.57334700 | 0.00005100  |
| C   | 5.25632800  | -2.74591500 | -0.00004100 |
| C   | -5.19328700 | -2.33702900 | -0.00016500 |
| C   | -6.09500200 | -1.31634500 | 0.00015000  |
| C   | -5.38717100 | -0.08381500 | 0.00025300  |
| C   | -4.05817700 | -0.43771100 | -0.00004000 |
| C   | 3.15232800  | 1.85401400  | -0.00015300 |
| C   | 1.82249200  | 2.32872200  | -0.00004900 |
| C   | -1.38424000 | 2.18332800  | -0.00002600 |
| C   | -2.70632200 | 1.69823500  | -0.00004000 |
| C   | 5.38725500  | -0.45256100 | 0.00014700  |
| C   | 6.10543500  | -1.67340300 | 0.00013300  |
| O   | 1.72221400  | 0.11480400  | 0.00002300  |
| O   | -3.93369100 | -1.80137200 | -0.00031400 |
| H   | -5.27229100 | -3.41122300 | -0.00045400 |
| S   | -1.25727000 | -0.41751600 | -0.00016200 |
| S   | 3.58625300  | -2.27103900 | -0.00003500 |
| F   | 6.00160300  | 0.74499100  | 0.00025900  |
| F   | -3.77096200 | 2.52156100  | 0.00001500  |
| H   | 7.18699800  | -1.73142500 | 0.00020500  |
| H   | -1.12343400 | 3.23339100  | 0.00003200  |
| F   | 1.44360800  | 3.61233600  | -0.00004600 |
| F   | -7.42629700 | -1.44330600 | 0.00036600  |
| H   | 4.06228700  | 2.43300800  | -0.00026500 |
| H   | -5.79648600 | 0.91404100  | 0.00051300  |
| H   | 5.51209200  | -3.79652200 | -0.00011100 |

## CFSFO-3

0 1

|   |             |             |             |
|---|-------------|-------------|-------------|
| C | 5.13353800  | 0.69508500  | 0.00001900  |
| C | 3.77908000  | -1.42458000 | -0.00047600 |
| C | 2.72761300  | -2.39104200 | -0.00050600 |
| C | 0.60894400  | -3.07276300 | -0.00016500 |
| C | -0.80179400 | -2.84607000 | 0.00012400  |
| C | -3.13270500 | -1.90148100 | 0.00036800  |
| C | -4.27409400 | -1.04339800 | 0.00045200  |
| C | -5.32691900 | 0.91581500  | 0.00009600  |
| C | 5.32843600  | 4.24172500  | 0.00173700  |
| C | 6.66846700  | 3.99836300  | 0.00088100  |
| C | 6.87552500  | 2.59231800  | 0.00005200  |
| C | 5.61270600  | 2.04735200  | 0.00046500  |
| C | 1.37617300  | -4.22015000 | -0.00062800 |
| C | 2.71226500  | -3.76860200 | -0.00082000 |
| C | 5.14062400  | -1.66668700 | -0.00113400 |
| C | 5.87641900  | -0.46633000 | -0.00082800 |
| C | -1.81039800 | -3.78967400 | 0.00052600  |
| C | -3.12287000 | -3.28526200 | 0.00065100  |
| C | -6.31623300 | -0.04359700 | 0.00091400  |
| C | -5.63134300 | -1.27750800 | 0.00108800  |
| O | 1.42020200  | -1.96731100 | -0.00006200 |
| O | -4.09372800 | 0.31936000  | -0.00008200 |
| O | 4.67068500  | 3.04126300  | 0.00148700  |
| C | -5.36403400 | 2.34871600  | -0.00046100 |
| C | -4.87052000 | 4.80094800  | -0.00145900 |
| C | -6.21583300 | 4.55222800  | -0.00120200 |
| C | -6.47793500 | 3.16040600  | -0.00059000 |
| H | 4.72559700  | 5.13429400  | 0.00249900  |
| S | 3.42734300  | 0.29503100  | 0.00049800  |
| S | -1.50702200 | -1.24053000 | -0.00003800 |
| S | -3.92476800 | 3.34536300  | -0.00096800 |
| F | -7.72788000 | 2.66185600  | -0.00022900 |
| F | -1.54864900 | -5.10923800 | 0.00073600  |
| F | 7.22238300  | -0.45133400 | -0.00134900 |
| H | -6.99184900 | 5.30778000  | -0.00142400 |
| H | -4.01012200 | -3.90451200 | 0.00095800  |
| H | 5.58686500  | -2.65231300 | -0.00177800 |
| F | -6.19438200 | -2.49084900 | 0.00178100  |
| F | 3.80545600  | -4.54071500 | -0.00125100 |
| F | 7.63533600  | 4.92243400  | 0.00082800  |
| H | -7.38170500 | 0.12299400  | 0.00130600  |
| H | 1.02187300  | -5.23878700 | -0.00078200 |
| H | 7.81425500  | 2.06144500  | -0.00073500 |
| H | -4.37207500 | 5.76051200  | -0.00192400 |

## CFSFO-4

0 1

|   |            |             |             |
|---|------------|-------------|-------------|
| C | 5.13980200 | 2.56822800  | -0.20193500 |
| C | 5.40584300 | 0.08645000  | 0.11090300  |
| C | 5.19179700 | -1.32113600 | 0.22142400  |
| C | 3.97299900 | -3.18332000 | 0.25075800  |
| C | 2.73832700 | -3.89869500 | 0.18313500  |

|   |             |             |             |
|---|-------------|-------------|-------------|
| C | 0.34000300  | -4.64150900 | 0.03431400  |
| C | -1.08131300 | -4.69921900 | -0.07452300 |
| C | -3.13377100 | -3.84967800 | -0.20620700 |
| C | 3.10704900  | 5.40405600  | -0.86894400 |
| C | 4.28698800  | 6.06980700  | -0.73012700 |
| C | 5.31058700  | 5.12654100  | -0.44321700 |
| C | 4.67478300  | 3.90703300  | -0.42454700 |
| C | 5.28301500  | -3.58497800 | 0.41866000  |
| C | 6.03778900  | -2.39404000 | 0.39796300  |
| C | 6.60704100  | 0.76449700  | 0.21282200  |
| C | 6.43196600  | 2.15012300  | 0.03488000  |
| C | 2.55147900  | -5.26719100 | 0.21277900  |
| C | 1.21913500  | -5.70686500 | 0.12946300  |
| C | -3.28605500 | -5.22040000 | -0.27306500 |
| C | -1.97838500 | -5.73963100 | -0.18735200 |
| O | 3.91348900  | -1.81867500 | 0.13190000  |
| O | -1.80592500 | -3.53100000 | -0.08740900 |
| O | 3.33925400  | 4.06796900  | -0.68115400 |
| C | -4.06593100 | -2.76759400 | -0.22842600 |
| C | -5.24745000 | -0.54900300 | -0.17170600 |
| C | -6.11978100 | -1.60780800 | -0.35581800 |
| C | -5.57363300 | 0.83851500  | -0.08856200 |
| C | -5.13641600 | 3.00097400  | 0.19265300  |
| C | -6.49529600 | 2.91607000  | -0.02208000 |
| O | -4.57536400 | 1.75217700  | 0.15250800  |
| C | -6.75399800 | 1.53987400  | -0.19756900 |
| C | -5.43704600 | -2.83642000 | -0.38283300 |
| H | 2.09621400  | 5.70227400  | -1.09106700 |
| C | -4.25874800 | 4.10595000  | 0.44453700  |
| C | -2.33665100 | 5.63262900  | 0.92325200  |
| C | -3.51297800 | 6.31972100  | 0.79572400  |
| C | -4.59036700 | 5.44128200  | 0.52535400  |
| S | 4.06991600  | 1.18032900  | -0.20603100 |
| S | 1.18219800  | -3.10157400 | 0.04672500  |
| S | -3.58446700 | -1.09239200 | -0.03756200 |
| S | -2.53887900 | 3.92136900  | 0.71459000  |
| F | -5.85238900 | 5.87709000  | 0.35978900  |
| F | -6.07520600 | -4.00925200 | -0.54551300 |
| F | 3.58487200  | -6.12234000 | 0.31622300  |
| F | 7.46162300  | 3.01536600  | 0.09141300  |
| H | -3.62384900 | 7.39320300  | 0.88733700  |
| H | -7.19186300 | -1.50762300 | -0.46217500 |
| H | 0.92144600  | -6.74699300 | 0.14040700  |
| H | 7.56234200  | 0.29364400  | 0.40365700  |
| F | -7.94855900 | 0.98662300  | -0.43300700 |
| F | -1.64052300 | -7.03375800 | -0.21138000 |
| F | 7.36660200  | -2.30105800 | 0.52548700  |
| F | 4.46177200  | 7.39111700  | -0.84300200 |
| H | -7.20131000 | 3.73097200  | -0.04720400 |
| H | -4.21114400 | -5.76654800 | -0.36777700 |
| H | 5.64240300  | -4.59450900 | 0.54045900  |
| H | 6.35886600  | 5.31688300  | -0.27615300 |
| H | -1.35347300 | 6.03154100  | 1.13183900  |

CFSFO-5

0 1

|   |             |             |             |
|---|-------------|-------------|-------------|
| C | 4.73942900  | 2.34708400  | 1.12947200  |
| C | 3.31326500  | 4.30356000  | 0.43852900  |
| C | 2.23786000  | 5.17534200  | 0.08856000  |
| C | 0.11440000  | 5.73154700  | -0.27860400 |
| C | -1.28624500 | 5.45983800  | -0.35215200 |
| C | -3.60569600 | 4.48229200  | -0.35212800 |
| C | -4.74838700 | 3.63287400  | -0.26243800 |
| C | -5.83186400 | 1.70532500  | -0.01453600 |
| C | 5.07661100  | -1.06054600 | 2.07427500  |
| C | 6.39103600  | -0.72213500 | 2.18795400  |
| C | 6.53854000  | 0.65057600  | 1.85045200  |
| C | 5.26813700  | 1.07860600  | 1.54186500  |
| C | 0.84850000  | 6.88457900  | -0.47529000 |
| C | 2.18677900  | 6.51268900  | -0.23878300 |
| C | 4.65482700  | 4.62946600  | 0.52634400  |
| C | 5.43005800  | 3.52050600  | 0.91449000  |
| C | -2.29958900 | 6.36516800  | -0.60341500 |
| C | -3.60339000 | 5.84349600  | -0.60724300 |
| C | -6.80718100 | 2.67535500  | -0.13815500 |
| C | -6.10350600 | 3.88495900  | -0.29536500 |
| O | 0.94869500  | 4.69669700  | 0.05955700  |
| O | -4.58799000 | 2.27801400  | -0.08809900 |
| O | 4.37829200  | 0.04724900  | 1.67595300  |
| C | -5.90210600 | 0.28934500  | 0.15747100  |
| C | -5.48789700 | -2.18182800 | 0.37977200  |
| C | -6.83163600 | -1.86000800 | 0.47166200  |
| C | -4.90405800 | -3.48052700 | 0.46273100  |
| C | -3.24289800 | -4.95902900 | 0.38231600  |
| C | -4.38061300 | -5.68343900 | 0.67863300  |
| O | -3.55353400 | -3.63026300 | 0.25345900  |
| C | -5.41946800 | -4.73219100 | 0.72390400  |
| C | -7.03777500 | -0.47650800 | 0.34229600  |
| H | 4.51638000  | -1.96766500 | 2.22632200  |
| C | -1.87863800 | -5.33129000 | 0.18421100  |
| C | 0.58483800  | -5.43821900 | -0.30317000 |
| C | 0.05733100  | -6.67533100 | 0.02458900  |
| C | -1.32043000 | -6.59043200 | 0.29138200  |
| C | 1.93817400  | -5.12841800 | -0.63372300 |
| C | 3.60891600  | -3.78728700 | -1.23211100 |
| C | 4.16559000  | -5.03988500 | -1.08262000 |
| C | 4.15619000  | -2.51364800 | -1.59539000 |
| C | 4.57821800  | -0.11833500 | -2.16845300 |
| C | 5.73165800  | -0.85503100 | -2.18091700 |
| O | 2.26710800  | -3.83491000 | -0.96279600 |
| C | 3.09290300  | -5.87575700 | -0.70418000 |
| C | 5.47524700  | -2.20861900 | -1.85490500 |
| S | 3.03081800  | 2.61667700  | 0.83721700  |
| S | -1.97939900 | 3.86622500  | -0.10824800 |
| S | -4.49321800 | -0.75500900 | 0.14004600  |
| S | -0.63777400 | -4.18013100 | -0.27277300 |
| S | 3.18506300  | -1.06742200 | -1.76201100 |
| F | 6.44850600  | -3.13540500 | -1.79925400 |
| F | -2.05474300 | -7.66579100 | 0.62786100  |
| F | -8.26478400 | 0.07284200  | 0.39042300  |
| F | -2.04880000 | 7.66766900  | -0.82884200 |
| F | 6.76522600  | 3.59970600  | 1.06841400  |
| H | 6.71858800  | -0.46837700 | -2.40266800 |

|   |             |             |             |
|---|-------------|-------------|-------------|
| H | 0.62915800  | -7.59282300 | 0.06924800  |
| H | -7.62555000 | -2.58010100 | 0.61901200  |
| H | -4.49179300 | 6.43394300  | -0.78702300 |
| H | 5.05972800  | 5.61297300  | 0.32830100  |
| F | 3.16625500  | -7.18649400 | -0.44881000 |
| F | -6.70795000 | -4.98465800 | 0.97822700  |
| F | -6.64701500 | 5.09748700  | -0.45044100 |
| F | 3.25347800  | 7.31781900  | -0.31329300 |
| F | 7.38446800  | -1.53871700 | 2.55556300  |
| H | 5.19912600  | -5.31190200 | -1.22751600 |
| H | -4.44984500 | -6.74815900 | 0.83568800  |
| H | -7.87507600 | 2.52702400  | -0.12131400 |
| H | 0.46987300  | 7.85641300  | -0.74892200 |
| H | 7.44441200  | 1.23585400  | 1.84084200  |
| H | 4.46201800  | 0.93813200  | -2.36688000 |

CFSFO-6

0 1

|   |             |             |             |
|---|-------------|-------------|-------------|
| C | 4.38524500  | 0.37314600  | -2.25986200 |
| C | 4.09586600  | -2.08991000 | -1.83733600 |
| C | 3.59146100  | -3.39368000 | -1.54441500 |
| C | 2.03582800  | -4.89864300 | -1.02813400 |
| C | 0.70221000  | -5.30962800 | -0.72118300 |
| C | -1.76711700 | -5.51913200 | -0.26945100 |
| C | -3.16322000 | -5.29184300 | -0.08548600 |
| C | -5.02718700 | -4.08216700 | 0.03432300  |
| C | 3.06128300  | 3.66416200  | -2.45463100 |
| C | 4.33907600  | 3.97302800  | -2.81105200 |
| C | 5.11257300  | 2.78097800  | -2.81066400 |
| C | 4.23443200  | 1.78819200  | -2.44239700 |
| C | 3.21563800  | -5.60314200 | -1.16129900 |
| C | 4.18616100  | -4.63522200 | -1.48753400 |
| C | 5.39803600  | -1.75792000 | -2.16626500 |
| C | 5.53401600  | -0.37660100 | -2.39787000 |
| C | 0.26208500  | -6.59569700 | -0.47238800 |
| C | -1.11177100 | -6.73831800 | -0.21698700 |
| C | -5.41603300 | -5.39683600 | 0.20428000  |
| C | -4.22582600 | -6.14446200 | 0.12628200  |
| O | 2.25756200  | -3.56510500 | -1.25710000 |
| O | -3.66831000 | -4.01318300 | -0.13898600 |
| O | 2.99054900  | 2.31667100  | -2.22464200 |
| C | -5.76741600 | -2.86126900 | 0.00512300  |
| C | -6.59232800 | -0.48532200 | -0.07294500 |
| C | -7.62666400 | -1.40361100 | -0.00115900 |
| C | -6.71480800 | 0.93362500  | -0.14646000 |
| C | -5.98261900 | 3.03390800  | -0.19328900 |
| C | -7.35658300 | 3.10870600  | -0.31585800 |
| O | -5.59078700 | 1.72387000  | -0.09291700 |
| C | -7.80061400 | 1.77255800  | -0.28226300 |
| C | -7.14206200 | -2.72041400 | 0.04390800  |
| H | 2.15729500  | 4.23449000  | -2.32368200 |
| C | -4.96320300 | 4.03205400  | -0.14006400 |
| C | -2.84146100 | 5.36266400  | 0.08661600  |
| C | -3.94165100 | 6.16189900  | -0.17633700 |
| C | -5.11375600 | 5.39699400  | -0.29623800 |
| C | -1.49191300 | 5.78348400  | 0.27282300  |

|   |             |             |             |
|---|-------------|-------------|-------------|
| C | 0.66932700  | 5.49969900  | 0.72312500  |
| C | 0.50661800  | 6.84974000  | 0.47885500  |
| C | 1.80477500  | 4.70643700  | 1.07022000  |
| C | 3.42883700  | 2.89456400  | 1.69477800  |
| C | 4.04045500  | 4.13030000  | 1.56726200  |
| O | -0.53277300 | 4.85295400  | 0.59777900  |
| C | -0.86521300 | 7.00904900  | 0.19805200  |
| C | 3.11322600  | 5.12634100  | 1.21772600  |
| S | 3.05379700  | -0.67778500 | -1.81816300 |
| S | -0.65950800 | -4.20456500 | -0.63420700 |
| S | -5.02374800 | -1.27455500 | -0.08905400 |
| S | -3.27744800 | 3.66468100  | 0.17526800  |
| S | 1.70620000  | 2.98395400  | 1.38051700  |
| C | 4.04722100  | 1.65498400  | 2.03772400  |
| C | 5.34342500  | 1.29683100  | 2.33605900  |
| O | 3.27954100  | 0.51817700  | 2.11688000  |
| C | 5.39257400  | -0.08696800 | 2.60701100  |
| C | 4.09431600  | -0.52730000 | 2.45939500  |
| C | 3.48203700  | -1.81609600 | 2.59408300  |
| C | 4.09384300  | -3.00718200 | 2.92108700  |
| S | 1.77176400  | -2.09416600 | 2.34749800  |
| C | 3.23759000  | -4.13308200 | 2.98017400  |
| C | 1.94553200  | -3.78535300 | 2.69185400  |
| H | 1.07687000  | -4.42782200 | 2.65326600  |
| F | 5.41430400  | -3.09104700 | 3.16563600  |
| F | 3.47024300  | 6.40998300  | 1.03694900  |
| F | -6.31221900 | 5.95482500  | -0.54409700 |
| F | -7.96287500 | -3.78333000 | 0.12128000  |
| F | 1.10242000  | -7.64738000 | -0.47657000 |
| F | 6.71258900  | 0.18000800  | -2.73485900 |
| H | 3.57755700  | -5.13252500 | 3.22194900  |
| H | 5.09739700  | 4.30853600  | 1.71374900  |
| H | -3.90731300 | 7.23888500  | -0.27363000 |
| H | -8.67604100 | -1.14184900 | 0.01998500  |
| H | -1.59462300 | -7.68443800 | -0.01197900 |
| H | 6.21155400  | -2.46733300 | -2.23990500 |
| F | 6.37904100  | 2.14244900  | 2.36153300  |
| F | -1.48070700 | 8.15892300  | -0.09775700 |
| F | -9.07065900 | 1.36155600  | -0.36877900 |
| F | -4.12270700 | -7.47399800 | 0.23432600  |
| F | 5.48508600  | -4.86812400 | -1.71174300 |
| F | 4.79812800  | 5.19242400  | -3.11361300 |
| H | 6.25403400  | -0.67954500 | 2.87137200  |
| H | 1.27079600  | 7.61023800  | 0.50486400  |
| H | -7.95211200 | 4.00281700  | -0.40984100 |
| H | -6.41800600 | -5.76175900 | 0.36381500  |
| H | 3.35366800  | -6.66613900 | -1.04470800 |
| H | 6.15855500  | 2.67047900  | -3.04901700 |

TFSFO-1

0 1

|   |             |             |             |
|---|-------------|-------------|-------------|
| C | -3.16757300 | -0.81781400 | 0.00004200  |
| C | -3.05488600 | 0.54270500  | -0.00003700 |
| C | -1.69502200 | 0.95507400  | -0.00004800 |
| H | -3.88512200 | 1.23847800  | -0.00000700 |
| C | -0.77132400 | -0.06629900 | -0.00003400 |

|   |             |             |             |
|---|-------------|-------------|-------------|
| C | 0.66885700  | 0.00031000  | 0.00002600  |
| C | 1.64630800  | -0.96555700 | 0.00005600  |
| O | 1.23930900  | 1.24372200  | 0.00017800  |
| C | 2.87501000  | -0.25039900 | 0.00007200  |
| H | 1.51759700  | -2.03806300 | 0.00002900  |
| C | 2.59654500  | 1.08206600  | 0.00007200  |
| H | 3.19803800  | 1.97575500  | 0.00008000  |
| F | -1.35760600 | 2.25232500  | -0.00002200 |
| F | 4.09251000  | -0.80414800 | 0.00006800  |
| S | -1.61736800 | -1.60155500 | -0.00018500 |
| H | -4.06872100 | -1.41517900 | 0.00012900  |

TFSSFO-2

0 1

|   |             |             |             |
|---|-------------|-------------|-------------|
| C | 6.81198400  | -0.61668400 | 0.00000900  |
| C | 6.01372500  | -1.72487300 | 0.00001200  |
| C | 4.63730500  | -1.37702400 | -0.00000500 |
| H | 6.36674300  | -2.74888700 | 0.00002900  |
| C | 4.37336600  | -0.02332000 | -0.00002300 |
| C | 3.10692100  | 0.65545700  | -0.00003900 |
| C | 2.75807800  | 1.98826400  | -0.00005500 |
| O | 1.98091000  | -0.12321500 | -0.00003900 |
| C | 1.34569000  | 1.99987600  | -0.00006700 |
| H | 3.41715300  | 2.84391700  | -0.00005700 |
| C | 0.88505200  | 0.70409800  | -0.00006000 |
| C | -0.41325400 | 0.10395600  | -0.00006900 |
| C | -0.71522600 | -1.24088800 | -0.00007300 |
| C | -2.10877600 | -1.46842400 | -0.00003500 |
| H | 0.02550100  | -2.03025200 | -0.00007400 |
| C | -2.89777600 | -0.33689400 | -0.00001200 |
| C | -4.33106300 | -0.21795600 | 0.00006000  |
| C | -5.17538500 | 0.86815200  | 0.00011700  |
| O | -5.05964100 | -1.37669300 | 0.00017400  |
| C | -6.48600200 | 0.31912500  | 0.00014000  |
| H | -4.90727900 | 1.91455200  | 0.00011200  |
| C | -6.38378800 | -1.03875100 | 0.00011300  |
| H | -7.09716200 | -1.84595700 | 0.00011700  |
| F | 3.67763600  | -2.31225900 | -0.00000100 |
| F | 0.56433200  | 3.08637400  | -0.00008300 |
| F | -2.61247900 | -2.70996100 | 0.00000500  |
| F | -7.62155700 | 1.02586100  | 0.00017000  |
| S | -1.86983700 | 1.08583200  | -0.00010800 |
| S | 5.89085100  | 0.85550600  | -0.00002500 |
| H | 7.89216900  | -0.57035300 | 0.00002100  |

TFSSFO-3

0 1

|   |            |             |             |
|---|------------|-------------|-------------|
| C | 6.77166600 | 0.22003900  | -0.00005600 |
| C | 6.76844300 | 1.59824700  | -0.00008300 |
| C | 5.40483400 | 1.96356000  | -0.00007800 |
| C | 4.63342200 | 0.82438900  | -0.00005100 |
| O | 5.48665800 | -0.25158800 | -0.00003600 |
| H | 7.62098000 | 2.26132900  | -0.00010300 |
| C | 3.22686500 | 0.57206300  | -0.00003400 |
| C | 2.59346100 | -0.65366900 | -0.00000700 |

|   |              |             |             |
|---|--------------|-------------|-------------|
| C | 1.18981900   | -0.52088700 | 0.00000300  |
| H | 3.11038300   | -1.60470100 | 0.00000700  |
| C | 0.71235600   | 0.77591800  | -0.00001700 |
| C | -0.64057000  | 1.24614000  | -0.00001500 |
| C | -1.19169600  | 2.51128900  | -0.00002800 |
| O | -1.63480900  | 0.30343200  | 0.00000300  |
| C | -2.58734700  | 2.30533700  | -0.00001800 |
| H | -0.67238600  | 3.45831700  | -0.00004300 |
| C | -2.84434200  | 0.95342400  | 0.00000100  |
| C | 7.82846600   | -0.75313100 | -0.00004600 |
| C | 7.74647400   | -2.13010000 | -0.00000200 |
| C | 8.99260800   | -2.80985900 | -0.00001100 |
| C | 10.04153100  | -1.93500900 | -0.00006800 |
| H | 9.07977000   | -3.88946700 | 0.00001700  |
| C | -4.03693000  | 0.16576700  | 0.00001600  |
| C | -4.13749600  | -1.20945900 | 0.00003300  |
| C | -5.48211700  | -1.63963300 | 0.00005300  |
| H | -3.28864300  | -1.88120200 | 0.00003500  |
| C | -6.42957700  | -0.63687800 | 0.00005000  |
| C | -7.86436800  | -0.73127200 | 0.00007500  |
| C | -8.86009800  | 0.21809000  | 0.00009500  |
| O | -8.41381200  | -1.98504600 | 0.00012700  |
| C | -10.07509800 | -0.51854700 | 0.00009700  |
| H | -8.74988300  | 1.29264100  | 0.00009300  |
| C | -9.77355900  | -1.84641200 | 0.00008900  |
| H | -10.35986500 | -2.75014700 | 0.00008800  |
| F | 6.58385200   | -2.79577500 | 0.00004200  |
| F | 4.92006700   | 3.21048900  | -0.00009600 |
| F | 0.38542600   | -1.59209700 | 0.00002900  |
| F | -3.52749900  | 3.25797700  | -0.00002500 |
| F | -5.79830700  | -2.94180400 | 0.00007800  |
| F | -11.30263200 | 0.01289400  | 0.00010300  |
| S | -5.62313000  | 0.92211200  | 0.00001200  |
| S | 2.06798000   | 1.89262700  | -0.00004900 |
| S | 9.51686700   | -0.27995500 | -0.00008200 |
| H | 11.09923400  | -2.15928800 | -0.00009300 |

TFSFO-4

0 1

|   |             |             |             |
|---|-------------|-------------|-------------|
| C | -3.12392400 | -1.90674700 | -0.00004200 |
| C | -2.86504700 | -3.26267400 | -0.00006900 |
| C | -1.45891800 | -3.36917000 | -0.00006100 |
| C | -0.91001700 | -2.10658100 | -0.00003300 |
| O | -1.94709300 | -1.20602200 | -0.00002000 |
| H | -3.58066400 | -4.07160100 | -0.00009000 |
| C | 0.42502900  | -1.60015500 | -0.00001500 |
| C | 0.82198300  | -0.27818900 | 0.00001500  |
| C | 2.22562600  | -0.15015700 | 0.00002500  |
| H | 0.13858900  | 0.56123500  | 0.00002900  |
| C | 2.93445100  | -1.33672200 | 0.00000400  |
| C | 4.35063900  | -1.54887300 | 0.00000600  |
| C | 5.12631900  | -2.69036700 | -0.00001200 |
| O | 5.15347500  | -0.43872900 | 0.00002900  |
| C | 6.45982400  | -2.22986400 | 0.00000100  |
| H | 4.79054500  | -3.71690400 | -0.00003100 |
| C | 6.46262500  | -0.85373900 | 0.00002500  |



|   |              |             |             |
|---|--------------|-------------|-------------|
| C | -4.34009700  | -1.15100900 | -0.00003400 |
| C | -4.52038600  | 0.21933200  | 0.00000700  |
| C | -5.86018900  | 0.65768300  | 0.00000200  |
| C | -6.74752700  | -0.39908900 | -0.00004600 |
| H | -6.15553300  | 1.69903000  | 0.00002900  |
| C | 7.48727500   | 0.14263000  | 0.00004400  |
| C | 7.32683500   | 1.51219000  | 0.00006600  |
| C | 8.56610200   | 2.18818700  | 0.00008700  |
| H | 6.36638500   | 2.01145100  | 0.00007100  |
| C | 9.68582000   | 1.38228700  | 0.00007900  |
| C | 11.07723100  | 1.74512800  | 0.00010100  |
| C | 12.23383200  | 1.00007500  | 0.00011800  |
| O | 11.38108100  | 3.07987400  | 0.00015400  |
| C | 13.28857800  | 1.95219400  | 0.00011900  |
| H | 12.32747200  | -0.07604000 | 0.00011500  |
| C | 12.74262200  | 3.19960500  | 0.00011200  |
| H | 13.14831700  | 4.19753700  | 0.00011100  |
| F | -3.49970600  | 1.08660800  | 0.00004800  |
| F | -0.75158400  | -4.50483200 | -0.00007900 |
| F | 2.81862200   | 1.05115100  | 0.00005300  |
| F | 7.55966000   | -2.99257000 | -0.00000900 |
| F | 8.63037400   | 3.52662700  | 0.00011600  |
| F | 14.59430400  | 1.66137000  | 0.00012000  |
| C | -8.17489900  | -0.33617800 | -0.00006900 |
| C | -9.17760800  | -1.27826700 | -0.00011700 |
| O | -8.77087900  | 0.90089300  | -0.00004200 |
| C | -10.42765800 | -0.62250800 | -0.00011400 |
| C | -10.12794300 | 0.72291400  | -0.00007200 |
| H | -11.40509400 | -1.08194000 | -0.00014300 |
| C | -10.94471900 | 1.90470600  | -0.00005200 |
| C | -10.56096800 | 3.22976300  | 0.00000100  |
| C | -11.62635900 | 4.16761900  | 0.00000600  |
| C | -12.84235400 | 3.54551700  | -0.00004700 |
| H | -11.47334500 | 5.23987100  | 0.00004300  |
| F | -8.97783100  | -2.60101700 | -0.00015600 |
| F | -9.28031500  | 3.62259700  | 0.00004300  |
| S | 9.18748800   | -0.30098600 | 0.00003900  |
| S | 1.80780600   | -2.68459100 | -0.00002900 |
| S | -5.90823900  | -1.94230100 | -0.00007700 |
| S | -12.69603300 | 1.81568400  | -0.00008800 |
| H | -13.82449000 | 3.99768100  | -0.00005900 |

TFSFO-5

0 1

|   |            |             |             |
|---|------------|-------------|-------------|
| C | 0.62138300 | -3.16309000 | -0.00004100 |
| C | 1.14121900 | -4.44231100 | -0.00006900 |
| C | 2.54076900 | -4.27105000 | -0.00005800 |
| C | 2.83171500 | -2.92545600 | -0.00002700 |
| O | 1.63836100 | -2.24535800 | -0.00001500 |
| H | 0.59830800 | -5.37596900 | -0.00009200 |
| C | 4.04229000 | -2.16858800 | -0.00000600 |
| C | 4.17509600 | -0.79459800 | 0.00002400  |
| C | 5.52721200 | -0.39658200 | 0.00003500  |
| H | 3.34150500 | -0.10411200 | 0.00003800  |
| C | 6.45293200 | -1.42288900 | 0.00001300  |
| C | 7.88326200 | -1.35559000 | 0.00001600  |

|   |              |             |             |
|---|--------------|-------------|-------------|
| C | 8.86620300   | -2.32448800 | -0.00000100 |
| O | 8.45493600   | -0.11043200 | 0.00003800  |
| C | 10.08461600  | -1.61341900 | 0.00001200  |
| H | 8.73679800   | -3.39675200 | -0.00001900 |
| C | 9.81979100   | -0.26307100 | 0.00003500  |
| C | -0.71904200  | -2.66052800 | -0.00003600 |
| C | -1.16428600  | -1.35179400 | 0.00001100  |
| C | -2.56335300  | -1.18365900 | 0.00000100  |
| C | -3.22768800  | -2.39388200 | -0.00005500 |
| H | -3.05664700  | -0.22021200 | 0.00003400  |
| C | 10.63199500  | 0.91276800  | 0.00005500  |
| C | 10.21097400  | 2.22588000  | 0.00007800  |
| C | 11.29712500  | 3.12773400  | 0.00009300  |
| H | 9.17247900   | 2.53135900  | 0.00008500  |
| C | 12.55090300  | 2.55228300  | 0.00008100  |
| C | 13.84653200  | 3.17583400  | 0.00009000  |
| C | 15.12476900  | 2.66689600  | 0.00009100  |
| O | 13.88824600  | 4.54409100  | 0.00012400  |
| C | 15.97685600  | 3.80395400  | 0.00009600  |
| H | 15.42354600  | 1.62884100  | 0.00008000  |
| C | 15.20144700  | 4.92322600  | 0.00010300  |
| H | 15.40784000  | 5.98052900  | 0.00010800  |
| F | -0.33273600  | -0.30176800 | 0.00006200  |
| F | 3.45766300   | -5.24557100 | -0.00007600 |
| F | 5.87640500   | 0.89688700  | 0.00006400  |
| F | 11.31207000  | -2.14727700 | 0.00000200  |
| F | 11.10321100  | 4.45374100  | 0.00011600  |
| F | 17.31418000  | 3.76938800  | 0.00009100  |
| C | -4.63898800  | -2.60929400 | -0.00008100 |
| C | -5.44028700  | -3.72883200 | -0.00014100 |
| O | -5.46432400  | -1.51132200 | -0.00004600 |
| C | -6.79281300  | -3.33025900 | -0.00014100 |
| C | -6.76168600  | -1.94994900 | -0.00008400 |
| H | -7.66202000  | -3.97130400 | -0.00017900 |
| C | -7.79245600  | -0.95619100 | -0.00005800 |
| C | -7.68131600  | 0.42153900  | 0.00000400  |
| C | -8.89928200  | 1.13107600  | 0.00001400  |
| C | -9.98849300  | 0.28364400  | -0.00004200 |
| H | -8.96986300  | 2.21118900  | 0.00006000  |
| C | -11.37071800 | 0.64501000  | -0.00005100 |
| C | -12.54928000 | -0.06484000 | -0.00010300 |
| O | -11.69299400 | 1.97984200  | 0.00000300  |
| C | -13.63328900 | 0.83928000  | -0.00008400 |
| C | -13.05701200 | 2.09152700  | -0.00001800 |
| H | -14.68551000 | 0.59580300  | -0.00011500 |
| C | -13.60634800 | 3.41886000  | 0.00003100  |
| C | -12.95081300 | 4.63265100  | 0.00010000  |
| C | -13.79376100 | 5.77454200  | 0.00013600  |
| C | -15.11381000 | 5.42365000  | 0.00009300  |
| H | -13.41754000 | 6.79023300  | 0.00019000  |
| H | -15.97786800 | 6.07358100  | 0.00010600  |
| F | -4.98571200  | -4.98690600 | -0.00019000 |
| F | -6.50151200  | 1.05532500  | 0.00005200  |
| F | -12.63219100 | -1.39981500 | -0.00016200 |
| F | -11.61595000 | 4.74508200  | 0.00013200  |
| S | 12.38606400  | 0.80471100  | 0.00005000  |
| S | 5.60962700   | -2.96388000 | -0.00002200 |

|   |              |             |             |
|---|--------------|-------------|-------------|
| S | -2.10228800  | -3.74343500 | -0.00009500 |
| S | -9.49150600  | -1.40115300 | -0.00010700 |
| S | -15.33676400 | 3.70191500  | 0.00000800  |

TFSFO-6

0 1

|   |             |             |             |
|---|-------------|-------------|-------------|
| C | 4.33996000  | -3.87269300 | -0.00010800 |
| C | 5.09994800  | -5.02551000 | -0.00014500 |
| C | 6.43899400  | -4.58380600 | -0.00014000 |
| C | 6.46128000  | -3.20730100 | -0.00010100 |
| O | 5.15768400  | -2.77389200 | -0.00008100 |
| H | 4.74961300  | -6.04712800 | -0.00017200 |
| C | 7.49931600  | -2.22701200 | -0.00007900 |
| C | 7.35772500  | -0.85389700 | -0.00003800 |
| C | 8.60434100  | -0.19623400 | -0.00002600 |
| H | 6.40400700  | -0.34200300 | -0.00001700 |
| C | 9.71492500  | -1.01896700 | -0.00005600 |
| C | 11.10395800 | -0.67105200 | -0.00005200 |
| C | 12.25827100 | -1.42769500 | -0.00008100 |
| O | 11.41953100 | 0.66219500  | -0.00001300 |
| C | 13.31307000 | -0.49087200 | -0.00005800 |
| H | 12.34191100 | -2.50448500 | -0.00011500 |
| C | 12.78782200 | 0.78102700  | -0.00001600 |
| C | 2.92719500  | -3.64231000 | -0.00009500 |
| C | 2.23380800  | -2.44638300 | -0.00006100 |
| C | 0.82891400  | -2.55581500 | -0.00005700 |
| C | 0.41483000  | -3.87292300 | -0.00008700 |
| H | 0.15637100  | -1.70770700 | -0.00003100 |
| C | 13.35264300 | 2.09378600  | 0.00002200  |
| C | 12.68048200 | 3.29780500  | 0.00006400  |
| C | 13.56701700 | 4.39643900  | 0.00009500  |
| H | 11.60208400 | 3.39160200  | 0.00007200  |
| C | 14.90980200 | 4.08015800  | 0.00007800  |
| C | 16.05638700 | 4.94789200  | 0.00010000  |
| C | 17.41005300 | 4.70221800  | 0.00008600  |
| O | 15.82624900 | 6.29736400  | 0.00014200  |
| C | 18.02012600 | 5.98549700  | 0.00012300  |
| H | 17.90828000 | 3.74382000  | 0.00005400  |
| C | 17.03842600 | 6.92903300  | 0.00015700  |
| H | 17.03143600 | 8.00625200  | 0.00019100  |
| F | 2.84315100  | -1.25349900 | -0.00003200 |
| F | 7.52842200  | -5.36059700 | -0.00016800 |
| F | 8.69013300  | 1.14074300  | 0.00001400  |
| F | 14.62159500 | -0.77293500 | -0.00007400 |
| F | 13.11485000 | 5.65791000  | 0.00013800  |
| F | 19.33787800 | 6.21636400  | 0.00012500  |
| C | -0.92599400 | -4.36249100 | -0.00009100 |
| C | -1.48972200 | -5.61866400 | -0.00011800 |
| O | -1.95261500 | -3.44967800 | -0.00006500 |
| C | -2.89414700 | -5.49606500 | -0.00010800 |
| C | -3.13734500 | -4.13677300 | -0.00007500 |
| H | -3.61926100 | -6.29644700 | -0.00012300 |
| C | -4.34502700 | -3.36846000 | -0.00005300 |
| C | -4.51139000 | -1.99606200 | -0.00002100 |
| C | -5.84596700 | -1.54365300 | -0.00000600 |
| C | -6.74488300 | -2.59155700 | -0.00002500 |

|   |              |             |             |
|---|--------------|-------------|-------------|
| H | -6.13063200  | -0.49936900 | 0.00001900  |
| C | -8.17027800  | -2.51384300 | -0.00001700 |
| C | -9.18261200  | -3.44696000 | -0.00003400 |
| O | -8.75468900  | -1.27086400 | 0.00001200  |
| C | -10.42564200 | -2.78153200 | -0.00001300 |
| C | -10.11416400 | -1.43633700 | 0.00001400  |
| H | -11.40721100 | -3.23199000 | -0.00001800 |
| C | -10.92112800 | -0.25364300 | 0.00004200  |
| C | -10.53194300 | 1.07268900  | 0.00007100  |
| C | -11.57990000 | 2.01532100  | 0.00009700  |
| C | -12.81885300 | 1.40737300  | 0.00008700  |
| H | -11.42925400 | 3.08719900  | 0.00011800  |
| F | -0.79506700  | -6.76201600 | -0.00014900 |
| F | -3.48126600  | -1.14005100 | -0.00000500 |
| F | -8.99311300  | -4.77119800 | -0.00006400 |
| F | -9.24797700  | 1.45320300  | 0.00007400  |
| S | 15.09337300  | 2.33425700  | 0.00002000  |
| S | 9.19276800   | -2.69644500 | -0.00010600 |
| S | 1.78303700   | -4.97560400 | -0.00012900 |
| S | -5.92149800  | -4.14372400 | -0.00006600 |
| S | -12.67540400 | -0.34319700 | 0.00005300  |
| C | -14.09850100 | 2.04274400  | 0.00010000  |
| C | -15.39693700 | 1.58767600  | 0.00013300  |
| O | -14.14232200 | 3.41529500  | 0.00008300  |
| C | -16.27410700 | 2.69351600  | 0.00015300  |
| C | -15.45494000 | 3.80220800  | 0.00010800  |
| H | -17.35385000 | 2.66954700  | 0.00018500  |
| C | -15.72327800 | 5.21344100  | 0.00009400  |
| C | -14.83586800 | 6.26962300  | 0.00003600  |
| S | -17.36071400 | 5.84068600  | 0.00016400  |
| C | -15.43050400 | 7.55841800  | 0.00004200  |
| C | -16.79423000 | 7.48173900  | 0.00009400  |
| H | -14.85663900 | 8.47702400  | 0.00000200  |
| H | -17.50915000 | 8.29287100  | 0.00010600  |
| F | -13.50586700 | 6.11015100  | -0.00001900 |
| F | -15.74996100 | 0.29763000  | 0.00014800  |
