# Supplementary material for: Folding oligomers of difluorinated thienylfurans: a DFT study
Source: Royal Society of Chemistry journal article supplement (doi:10.1039/b916415d), 2009-11-18
Supplement: b916415d.zip [file b916415d.zip]

Cartesian coordinates of B3LYP/6-31G(d) optimized geometries  
all-cisoid CFOFS-n, and all-transoid TFOFS-n, n = 1-6.  
Charge and multiplicity are given first.

CFOFS-1

|     |             |             |             |
|-----|-------------|-------------|-------------|
| 0 1 |             |             |             |
| C   | 3.14058200  | -0.99752900 | 0.00005500  |
| C   | 1.11807200  | -0.10337700 | 0.00005400  |
| C   | 2.03896400  | 0.91365300  | -0.00008000 |
| C   | 3.34432200  | 0.35023600  | -0.00005200 |
| O   | 1.80967800  | -1.28872000 | 0.00022800  |
| H   | 4.28612300  | 0.87876000  | -0.00013600 |
| C   | -0.31912400 | -0.12891400 | 0.00006300  |
| C   | -2.72645800 | -0.81817500 | -0.00024000 |
| C   | -2.53365200 | 0.53283400  | 0.00004300  |
| C   | -1.17686600 | 0.94900300  | 0.00024100  |
| H   | -0.85815200 | 1.98319300  | 0.00043800  |
| F   | 1.74410800  | 2.22047600  | -0.00021100 |
| F   | -3.54098900 | 1.42197000  | 0.00011000  |
| S   | -1.19950800 | -1.64466900 | -0.00008800 |
| H   | 3.80512100  | -1.84731400 | 0.00010800  |
| H   | -3.66149800 | -1.35857300 | -0.00042400 |

CFOFS-2

|     |             |             |             |
|-----|-------------|-------------|-------------|
| 0 1 |             |             |             |
| C   | 5.36722700  | -2.73286200 | -0.00010500 |
| C   | 4.35282300  | -0.76849900 | 0.00000100  |
| C   | 5.70987500  | -0.55404700 | -0.00004700 |
| C   | 6.37196000  | -1.81079100 | -0.00010600 |
| O   | 4.14803900  | -2.12577600 | -0.00006200 |
| H   | 7.43686700  | -1.99034000 | -0.00014500 |
| C   | 3.21992800  | 0.10931400  | 0.00005700  |
| C   | 0.90182700  | 1.08250600  | 0.00004600  |
| C   | 1.92063000  | 2.01286500  | 0.00021100  |
| C   | -0.50809400 | 1.32575200  | 0.00000100  |
| C   | -2.63349900 | 0.66740700  | -0.00005800 |
| C   | -2.60408900 | 2.04258000  | -0.00015300 |
| O   | -1.33126300 | 0.22934100  | 0.00003600  |
| C   | -1.26140300 | 2.48040700  | -0.00007300 |
| C   | 3.22833700  | 1.49047900  | 0.00021900  |
| H   | -0.89618800 | 3.49520200  | -0.00010100 |
| H   | 4.12343200  | 2.09855800  | 0.00034200  |
| F   | 6.29827200  | 0.64844200  | -0.00002800 |
| F   | 1.67692200  | 3.33613400  | 0.00034900  |
| F   | -3.68795600 | 2.82826700  | -0.00027500 |
| C   | -3.69785100 | -0.29129700 | -0.00006300 |
| C   | -5.06694900 | -2.38903300 | 0.00054100  |
| C   | -5.80568900 | -1.24070300 | 0.00003600  |
| C   | -5.05391400 | -0.03861300 | -0.00030800 |
| H   | -5.49047000 | 0.95149700  | -0.00056800 |
| F   | -7.14897000 | -1.22880500 | 0.00004600  |
| S   | 1.58725900  | -0.53102200 | -0.00010300 |
| S   | -3.37051300 | -2.01468200 | -0.00003200 |
| H   | 5.35209900  | -3.81150500 | -0.00013700 |
| H   | -5.41900200 | -3.40981500 | 0.00096600  |

## CFOFS-3

0 1

|   |             |             |             |
|---|-------------|-------------|-------------|
| C | -5.14018900 | 4.75211400  | -0.00152300 |
| C | -5.59905200 | 2.58992500  | -0.00033300 |
| C | -6.78537100 | 3.28335800  | -0.00043900 |
| C | -6.50184800 | 4.67501800  | -0.00117900 |
| O | -4.58112200 | 3.51056000  | -0.00107100 |
| H | -7.21199600 | 5.48861100  | -0.00138300 |
| C | -5.27862500 | 1.19340700  | 0.00018100  |
| C | -4.10172300 | -1.02725600 | 0.00039800  |
| C | -5.48019700 | -1.10206100 | 0.00156600  |
| C | -3.16842400 | -2.11000100 | 0.00029600  |
| C | -1.11175900 | -2.95902700 | -0.00000600 |
| C | -2.01415800 | -4.00048500 | -0.00028000 |
| O | -1.83548200 | -1.79034900 | 0.00033000  |
| C | -3.32507100 | -3.48116700 | 0.00001400  |
| C | -6.16080900 | 0.12985300  | 0.00142600  |
| H | -4.25450000 | -4.02812400 | -0.00000800 |
| H | -7.23857800 | 0.22640300  | 0.00225500  |
| F | -8.00174500 | 2.72517600  | 0.00008500  |
| F | -6.12894000 | -2.28055400 | 0.00271200  |
| F | -1.67926800 | -5.29586900 | -0.00067400 |
| C | 0.31438300  | -2.90263800 | -0.00005500 |
| C | 2.71946900  | -2.16542500 | -0.00017100 |
| C | 2.53170100  | -3.53351500 | -0.00044600 |
| C | 1.19526000  | -3.97009500 | -0.00039800 |
| H | 0.89671900  | -5.01002000 | -0.00062400 |
| F | 3.56719300  | -4.39269500 | -0.00081800 |
| C | 3.95870700  | -1.45266000 | -0.00025300 |
| C | 5.17631400  | 0.41018800  | 0.00006900  |
| C | 6.03047200  | -0.66823900 | -0.00064000 |
| C | 5.38510500  | 1.82710300  | 0.00038400  |
| C | 5.10050900  | 4.31614800  | 0.00024600  |
| C | 6.40197900  | 3.90330200  | 0.00101200  |
| H | 4.72083600  | 5.32700000  | 0.00008800  |
| O | 3.89365900  | -0.08297500 | 0.00029100  |
| C | 5.27608400  | -1.86140400 | -0.00068900 |
| C | 6.59061300  | 2.49824800  | 0.00110500  |
| H | 7.55921700  | 2.01577700  | 0.00161800  |
| H | 5.64261600  | -2.87573900 | -0.00110900 |
| F | 7.36628300  | -0.58259000 | -0.00109400 |
| F | 7.44364800  | 4.75188500  | 0.00164300  |
| S | -3.60971900 | 0.65528000  | -0.00092200 |
| S | 1.15954500  | -1.36422300 | 0.00036000  |
| S | 4.03329800  | 2.94546900  | -0.00028900 |
| H | -4.44551500 | 5.57746700  | -0.00203300 |

## CFOFS-4

0 1

|   |            |             |             |
|---|------------|-------------|-------------|
| C | 2.62042100 | 5.72121500  | -0.97091400 |
| C | 4.31771200 | 4.37166700  | -0.54435200 |
| C | 4.94297800 | 3.10561200  | -0.30215800 |
| C | 5.42870700 | 0.66636900  | 0.05517500  |
| C | 5.39249700 | -0.75471600 | 0.20385400  |

|   |             |             |             |
|---|-------------|-------------|-------------|
| C | 4.34861600  | -2.71843500 | 0.27506500  |
| C | 4.79693900  | 5.65730100  | -0.62106900 |
| C | 3.71345900  | 6.53361600  | -0.89518200 |
| C | 6.28559400  | 2.86284700  | -0.08275600 |
| C | 6.53389700  | 1.49177200  | 0.11399900  |
| C | 5.69810400  | -2.93419700 | 0.45334800  |
| C | 6.37710100  | -1.69945800 | 0.41206100  |
| O | 2.96375000  | 4.42009400  | -0.76271500 |
| O | 4.16766600  | -1.36402800 | 0.12251200  |
| H | 3.75211700  | 7.60599400  | -1.01671300 |
| H | 7.05173900  | 3.62672300  | -0.06600700 |
| H | 7.43562500  | -1.52165600 | 0.51617800  |
| C | 3.21777300  | -3.58695100 | 0.22386700  |
| C | 0.90116800  | -4.55474500 | 0.07761700  |
| C | 1.91283300  | -5.48705800 | 0.20469300  |
| C | -0.50135100 | -4.79767400 | -0.04013000 |
| C | -2.62170600 | -4.14299200 | -0.20836800 |
| C | -2.58586900 | -5.52039500 | -0.24052800 |
| O | -1.32530900 | -3.70288100 | -0.08393600 |
| C | -1.24910000 | -5.95478700 | -0.13363000 |
| C | 3.21690300  | -4.96995700 | 0.29026900  |
| H | -0.88040200 | -6.96827800 | -0.12902600 |
| H | 4.10527500  | -5.57924900 | 0.39108400  |
| F | 6.07821800  | 6.00982500  | -0.46212600 |
| F | 7.76928700  | 1.01141500  | 0.34231700  |
| F | 6.25781300  | -4.13517700 | 0.63552000  |
| F | 1.66037500  | -6.80780300 | 0.24053100  |
| F | -3.66340900 | -6.30524800 | -0.35433300 |
| C | -3.68363900 | -3.19155900 | -0.26344200 |
| C | -5.07307600 | -1.09478500 | -0.24165100 |
| C | -5.78606600 | -2.26155900 | -0.43537200 |
| C | -5.03112000 | -3.44747300 | -0.45017800 |
| H | -5.45310500 | -4.43381200 | -0.59043800 |
| F | -7.12167700 | -2.25875200 | -0.59912200 |
| C | -5.58221000 | 0.23945700  | -0.17748600 |
| C | -5.36729700 | 2.43448000  | 0.12035300  |
| C | -6.68902300 | 2.15806500  | -0.14277000 |
| C | -4.65496800 | 3.64392900  | 0.40477000  |
| C | -2.90938100 | 5.34579900  | 0.98235500  |
| C | -4.15407400 | 5.86939900  | 0.78036100  |
| H | -2.00089300 | 5.86697900  | 1.24487800  |
| O | -4.68641800 | 1.24073900  | 0.09622000  |
| C | -6.84629400 | 0.76851400  | -0.33491400 |
| C | -5.16075900 | 4.92683700  | 0.45166800  |
| H | -6.19488200 | 5.18412600  | 0.26349800  |
| H | -7.75333400 | 0.22920700  | -0.55733200 |
| F | -7.66247000 | 3.07473900  | -0.20137400 |
| F | -4.42583100 | 7.18157600  | 0.88070700  |
| S | 3.99807900  | 1.62938500  | -0.26017300 |
| S | 1.59321000  | -2.94336100 | 0.06090500  |
| S | -3.37002500 | -1.47538400 | -0.06917200 |
| S | -2.93858500 | 3.62178700  | 0.76849400  |
| H | 1.57412900  | 5.90375400  | -1.16005500 |

0 1

|   |             |             |             |
|---|-------------|-------------|-------------|
| C | 4.89337100  | 1.92807400  | 1.27515500  |
| C | 3.63864700  | 3.98941600  | 0.57048200  |
| C | 2.67441000  | 4.97720900  | 0.20038300  |
| C | 0.60552200  | 5.68287200  | -0.21429200 |
| C | -0.81148100 | 5.56282900  | -0.32849600 |
| C | -3.19381800 | 4.75497800  | -0.38061800 |
| C | -4.42349700 | 4.03082200  | -0.32199500 |
| C | -5.64177900 | 2.18474600  | -0.08049600 |
| C | 4.91062200  | -1.51711900 | 2.17066000  |
| C | 6.25452600  | -1.33683900 | 2.32011100  |
| C | 6.47361900  | 0.02866000  | 1.99937000  |
| C | 5.26896300  | 0.60530800  | 1.67501500  |
| C | 1.47072300  | 6.74350800  | -0.37808600 |
| C | 2.78791300  | 6.31540900  | -0.12007100 |
| C | 5.00251600  | 4.15790400  | 0.70558800  |
| C | 5.72582100  | 3.01710600  | 1.09886800  |
| C | -1.70909700 | 6.57730300  | -0.61707600 |
| C | -3.03057200 | 6.10299900  | -0.63834000 |
| C | -6.49574400 | 3.25189400  | -0.26034700 |
| C | -5.74227000 | 4.43121800  | -0.41669600 |
| O | 1.36045900  | 4.59028000  | 0.14297700  |
| O | -4.35761900 | 2.67623700  | -0.12084000 |
| O | 4.30268800  | -0.36192600 | 1.78598700  |
| H | 6.99292000  | -2.06806100 | 2.61360200  |
| H | 6.79782500  | 2.99914300  | 1.24450900  |
| H | 3.69380900  | 6.89909100  | -0.15913000 |
| H | -1.43141500 | 7.60691400  | -0.79861700 |
| H | -6.10688900 | 5.43417300  | -0.57102900 |
| C | -5.86474100 | 0.78816700  | 0.10549800  |
| C | -5.63316700 | -1.70409400 | 0.35785100  |
| C | -6.93103600 | -1.23279900 | 0.41080600  |
| C | -5.19756600 | -3.05949800 | 0.47062000  |
| C | -3.65581000 | -4.66379700 | 0.42833000  |
| C | -4.87725200 | -5.23892900 | 0.70515900  |
| O | -3.86313400 | -3.31171500 | 0.28529700  |
| C | -5.86826200 | -4.23755600 | 0.73513400  |
| C | -7.08627300 | 0.15597400  | 0.26991000  |
| H | -6.92298500 | -4.35472100 | 0.92658900  |
| H | -8.04090300 | 0.66453600  | 0.28875900  |
| H | 4.26070200  | -2.36974800 | 2.28875400  |
| F | 7.65149100  | 0.66334000  | 2.00684500  |
| F | 5.59952600  | 5.34116900  | 0.47624200  |
| F | 1.09892300  | 7.98021800  | -0.72675800 |
| F | -4.07710300 | 6.90961700  | -0.89009000 |
| F | -7.83014400 | 3.16126200  | -0.28148500 |
| F | -7.97887700 | -2.05763000 | 0.58783200  |
| F | -5.07201000 | -6.54676900 | 0.90782500  |
| C | -2.34140100 | -5.19250900 | 0.26161900  |
| C | 0.11356300  | -5.50074700 | -0.19003800 |
| C | -0.56458000 | -6.65674700 | 0.14209200  |
| C | -1.93931300 | -6.51041700 | 0.39814200  |
| H | -2.59599300 | -7.32716600 | 0.66724500  |
| F | 0.05671100  | -7.84829800 | 0.21412000  |
| C | 1.50194100  | -5.35546100 | -0.49666400 |
| C | 3.28604300  | -4.16336900 | -1.09045200 |
| C | 3.67792600  | -5.46817500 | -0.89897400 |

|   |             |             |             |
|---|-------------|-------------|-------------|
| C | 3.98255300  | -2.97114200 | -1.47171900 |
| C | 4.60159500  | -0.62654300 | -2.09655400 |
| C | 5.65620400  | -1.49398400 | -2.07129100 |
| H | 4.60807200  | 0.42750200  | -2.33062300 |
| O | 1.93646700  | -4.10054900 | -0.83803100 |
| C | 2.55837000  | -6.24212500 | -0.52209900 |
| C | 5.33246100  | -2.82895100 | -1.72085300 |
| H | 6.05397200  | -3.63315300 | -1.65938000 |
| H | 2.52599400  | -7.29721400 | -0.30085900 |
| F | 4.93041600  | -5.91723200 | -1.05067900 |
| F | 6.91828400  | -1.12812500 | -2.35199900 |
| S | 3.21741200  | 2.32916000  | 0.94740500  |
| S | -1.62436400 | 4.02473000  | -0.09294600 |
| S | -4.53422600 | -0.35660400 | 0.12323200  |
| S | -1.00320700 | -4.14869700 | -0.18586700 |
| S | 3.13195600  | -1.45180400 | -1.67891500 |

CFOFS-6

0 1

|   |             |             |             |
|---|-------------|-------------|-------------|
| C | -4.37315800 | -1.13658500 | -2.25714500 |
| C | -4.46545600 | 1.32833100  | -1.78243300 |
| C | -4.21262500 | 2.70021100  | -1.47206500 |
| C | -2.89483900 | 4.41564000  | -0.95862100 |
| C | -1.66011200 | 5.07177900  | -0.67831200 |
| C | 0.75224400  | 5.66783000  | -0.27389300 |
| C | 2.17011800  | 5.72113800  | -0.11182700 |
| C | 4.20929600  | 4.83538700  | -0.02289000 |
| C | -2.52219200 | -4.16776000 | -2.52160600 |
| C | -3.72176700 | -4.71516500 | -2.87160900 |
| C | -4.63966400 | -3.63275300 | -2.82774300 |
| C | -3.96390900 | -2.49445200 | -2.45842500 |
| C | -4.19293900 | 4.87237500  | -1.04599400 |
| C | -5.04355600 | 3.79861300  | -1.37154300 |
| C | -5.67971300 | 0.75371800  | -2.10329100 |
| C | -5.65221600 | -0.62609500 | -2.37361000 |
| C | -1.48234200 | 6.42162600  | -0.42232900 |
| C | -0.13065300 | 6.72923800  | -0.20186100 |
| C | 4.31596800  | 6.19903300  | 0.15106200  |
| C | 3.03451400  | 6.77816400  | 0.09969700  |
| O | -2.91572800 | 3.06727600  | -1.22446200 |
| O | 2.87339300  | 4.54601500  | -0.18359400 |
| O | -2.64849600 | -2.83563400 | -2.27083000 |
| H | -3.93235400 | -5.74356900 | -3.12495500 |
| H | -6.52342700 | -1.21055800 | -2.63808500 |
| H | -6.11252400 | 3.82007600  | -1.51137200 |
| H | -2.28176400 | 7.14992300  | -0.39922100 |
| H | 2.77418000  | 7.81982600  | 0.19742700  |
| C | 5.18220800  | 3.79297500  | -0.05703100 |
| C | 6.40508400  | 1.59460200  | -0.13451800 |
| C | 7.21738100  | 2.71033800  | -0.05858800 |
| C | 6.82423200  | 0.23103800  | -0.20047200 |
| C | 6.47761600  | -1.96636900 | -0.23372700 |
| C | 7.83340900  | -1.73615400 | -0.32990100 |
| O | 5.85810900  | -0.74034000 | -0.15461200 |
| C | 8.07349200  | -0.34908300 | -0.30933500 |
| C | 6.55829300  | 3.94856200  | -0.01153400 |

|   |             |             |             |
|---|-------------|-------------|-------------|
| H | 9.02201700  | 0.16000400  | -0.36878500 |
| H | 7.06500100  | 4.90231200  | 0.04893000  |
| H | -1.53007800 | -4.57315300 | -2.40161700 |
| F | -5.94923500 | -3.69491200 | -3.09858600 |
| F | -6.81599300 | 1.47149500  | -2.15475600 |
| F | -4.56606200 | 6.14182700  | -0.85295100 |
| F | 0.28408500  | 7.98177000  | 0.06035000  |
| F | 5.46736200  | 6.85334000  | 0.33872500  |
| F | 8.55878000  | 2.61209000  | -0.03403100 |
| F | 8.76135200  | -2.69485000 | -0.42377900 |
| C | 5.69930300  | -3.16019400 | -0.18465800 |
| C | 3.85520300  | -4.85656800 | 0.03346700  |
| C | 5.10909000  | -5.38859600 | -0.19834100 |
| C | 6.15627100  | -4.46078300 | -0.32258800 |
| H | 7.18799700  | -4.73145800 | -0.50307800 |
| F | 5.30917300  | -6.71514300 | -0.29848000 |
| C | 2.62682800  | -5.56442200 | 0.20209300  |
| C | 0.44272900  | -5.68100600 | 0.61704500  |
| C | 0.91456600  | -6.95710700 | 0.39681300  |
| C | -0.84578100 | -5.15413600 | 0.93098500  |
| C | -2.78689700 | -3.66297200 | 1.50834900  |
| C | -3.10424900 | -4.99976900 | 1.36883400  |
| O | 1.51062000  | -4.82343700 | 0.49333100  |
| C | 2.29820700  | -6.90419500 | 0.13247100  |
| C | -2.03473700 | -5.85422200 | 1.04752300  |
| H | -2.13142100 | -6.92322000 | 0.91098500  |
| H | 2.96415900  | -7.72551100 | -0.07948100 |
| F | 0.15922600  | -8.06168100 | 0.43242000  |
| F | -4.36128600 | -5.45225400 | 1.53017500  |
| S | -3.21458400 | 0.10088000  | -1.81147300 |
| S | -0.13696800 | 4.19774000  | -0.63507200 |
| S | 4.72437000  | 2.10047700  | -0.15200900 |
| S | 3.96837000  | -3.10692800 | 0.10081800  |
| S | -1.07115800 | -3.43915200 | 1.22789300  |
| C | -3.66660800 | -2.58246500 | 1.82827600  |
| C | -5.02377300 | -2.51457800 | 2.06462600  |
| O | -3.10964000 | -1.33456000 | 1.93666300  |
| C | -5.28267000 | -1.15164900 | 2.32629600  |
| H | -5.72796800 | -3.33131500 | 2.05024800  |
| C | -4.10682300 | -0.44177600 | 2.24668500  |
| C | -3.78052300 | 0.94166600  | 2.42302600  |
| C | -4.64852800 | 1.98235500  | 2.68417400  |
| S | -2.12189900 | 1.50294900  | 2.32785800  |
| C | -3.95836600 | 3.21508300  | 2.80024000  |
| H | -5.72050800 | 1.87468300  | 2.78566300  |
| C | -2.60394000 | 3.14145400  | 2.64014100  |
| H | -1.88174800 | 3.94307800  | 2.68036000  |
| F | -6.47747200 | -0.61886500 | 2.61069600  |
| F | -4.60946200 | 4.36441100  | 3.04769500  |

TFOFS-1

0 1

|   |            |             |             |
|---|------------|-------------|-------------|
| C | 2.65331100 | 0.85418100  | 0.00007100  |
| C | 2.61764300 | -0.50951700 | -0.00000800 |
| C | 1.31746700 | -1.07915000 | -0.00007000 |
| C | 0.34015200 | -0.11015200 | -0.00002600 |

|   |             |             |             |
|---|-------------|-------------|-------------|
| C | -1.08526200 | -0.29913100 | 0.00002600  |
| C | -2.16003100 | 0.55274900  | 0.00002700  |
| O | -1.57414100 | -1.58271600 | 0.00008100  |
| C | -3.35678100 | -0.21467700 | 0.00008900  |
| C | -2.93446500 | -1.51044400 | 0.00012000  |
| H | -3.45216700 | -2.45703100 | 0.00016600  |
| S | 1.04055900  | 1.49947500  | -0.00015700 |
| H | 3.51850800  | 1.50035900  | 0.00015800  |
| F | -2.07852900 | 1.88999700  | -0.00001800 |
| H | 1.12166600  | -2.14374600 | -0.00008000 |
| H | -4.37202200 | 0.15343100  | 0.00010600  |
| F | 3.72030600  | -1.27733500 | 0.00003400  |

TFOFS-2

0 1

|   |             |             |             |
|---|-------------|-------------|-------------|
| C | 6.35042500  | -0.44103500 | -0.00005200 |
| C | 5.55793800  | -1.55220600 | -0.00003500 |
| C | 4.16224300  | -1.29882800 | -0.00002800 |
| C | 3.89410200  | 0.05262300  | -0.00004000 |
| C | 2.60728400  | 0.68443600  | -0.00003400 |
| C | 2.17832600  | 1.99009900  | -0.00004400 |
| O | 1.49260300  | -0.11651500 | -0.00001300 |
| C | 0.76588900  | 2.01351700  | -0.00003100 |
| C | 0.38430500  | 0.68886200  | -0.00001100 |
| C | -0.89600000 | 0.04317100  | 0.00000900  |
| C | -1.19821900 | -1.30371100 | 0.00002900  |
| C | -2.57429400 | -1.61938200 | 0.00004600  |
| C | -3.36251500 | -0.48953700 | 0.00004000  |
| C | -4.79450800 | -0.41729100 | 0.00005200  |
| C | -5.69636700 | 0.61793800  | 0.00004500  |
| O | -5.50994900 | -1.58992100 | 0.00007100  |
| C | -7.01211000 | 0.08227200  | 0.00008400  |
| C | -6.83364800 | -1.26942700 | 0.00006800  |
| H | -7.51563500 | -2.10547800 | 0.00007300  |
| S | -2.38704900 | 0.97068200  | 0.00000900  |
| S | 5.37501800  | 0.99669300  | -0.00006700 |
| H | 7.42905600  | -0.38988400 | -0.00005900 |
| F | -5.36917500 | 1.91626600  | 0.00002600  |
| F | 2.98551600  | 3.05803500  | -0.00006400 |
| F | -0.26217800 | -2.26253200 | 0.00003300  |
| F | 6.04493300  | -2.80440900 | -0.00002400 |
| H | -7.94315900 | 0.62922600  | 0.00010000  |
| H | -2.95798400 | -2.63143900 | 0.00006300  |
| H | 0.12806900  | 2.88515700  | -0.00003500 |
| H | 3.40195200  | -2.06934500 | -0.00001400 |

TFOFS-3

0 1

|   |              |            |            |
|---|--------------|------------|------------|
| C | -10.20281700 | 2.10839900 | 0.00015200 |
| C | -10.57065400 | 0.79539400 | 0.00019700 |
| O | -8.84732700  | 2.23939400 | 0.00011500 |
| C | -9.34390900  | 0.07964100 | 0.00018700 |
| C | -8.30490500  | 0.97746000 | 0.00013800 |
| C | -6.87748300  | 0.84593000 | 0.00010800 |
| C | -5.93651800  | 1.85267300 | 0.00006100 |

|   |              |             |             |
|---|--------------|-------------|-------------|
| C | -4.61987900  | 1.34459200  | 0.00003600  |
| C | -4.51264000  | -0.03224100 | 0.00006400  |
| C | -3.33873900  | -0.85379500 | 0.00004500  |
| C | -3.15508300  | -2.22136500 | 0.00007400  |
| O | -2.12521600  | -0.21857500 | -0.00001100 |
| C | -1.75655300  | -2.40506400 | 0.00003000  |
| C | -1.13947100  | -1.17477800 | -0.00002400 |
| C | 0.22279700   | -0.74498700 | -0.00008300 |
| C | 0.69777300   | 0.55045300  | -0.00014200 |
| C | 2.10734300   | 0.59462300  | -0.00015700 |
| C | 2.74364300   | -0.63170800 | -0.00011900 |
| S | -6.12039800  | -0.73840400 | 0.00013700  |
| S | 1.53886800   | -1.90954600 | -0.00011500 |
| C | 4.14487100   | -0.93164700 | -0.00010200 |
| C | 4.84650100   | -2.11882400 | -0.00008500 |
| O | 5.01616800   | 0.12566800  | -0.00009700 |
| C | 6.20744900   | -1.74247700 | -0.00008100 |
| C | 6.29617600   | -0.37076400 | -0.00009800 |
| C | 7.38448700   | 0.56179300  | -0.00011500 |
| C | 7.30992400   | 1.93768100  | -0.00022900 |
| S | 9.05338300   | 0.01393300  | -0.00022400 |
| C | 8.59941800   | 2.52862800  | 0.00003600  |
| C | 9.64242200   | 1.64824300  | 0.00032400  |
| H | 10.70019000  | 1.86551300  | 0.00062900  |
| F | -9.20239100  | -1.25153900 | 0.00022000  |
| F | -1.11249500  | -3.57797200 | 0.00003800  |
| F | 7.25609200   | -2.57476900 | -0.00006300 |
| H | -11.56970100 | 0.38555000  | 0.00023100  |
| H | -3.91410800  | -2.98972600 | 0.00012000  |
| H | 4.44709200   | -3.12233600 | -0.00007900 |
| F | -3.55606600  | 2.15864100  | -0.00001500 |
| F | 2.77104300   | 1.75869900  | -0.00018500 |
| F | 8.76133900   | 3.86244300  | 0.00014600  |
| H | -6.17270800  | 2.90893500  | 0.00004100  |
| H | 0.06591000   | 1.42936500  | -0.00015200 |
| H | 6.38282000   | 2.49655300  | -0.00034400 |
| H | -10.76075700 | 3.03184100  | 0.00014100  |

TFOFS-4

|     |              |             |             |
|-----|--------------|-------------|-------------|
| 0 1 |              |             |             |
| C   | -11.45572500 | 2.07435200  | 0.00015000  |
| C   | -12.64790700 | 1.39285800  | 0.00020200  |
| C   | -13.71421800 | 2.33095000  | 0.00018100  |
| C   | -13.10086400 | 3.54882400  | 0.00011300  |
| O   | -11.74560400 | 3.41695700  | 0.00009200  |
| C   | -10.08012600 | 1.67168300  | 0.00014300  |
| C   | -8.96409100  | 2.48025500  | 0.00009300  |
| C   | -7.76914700  | 1.72985000  | 0.00008600  |
| C   | -7.92732200  | 0.35781700  | 0.00013200  |
| C   | -6.93067000  | -0.67139600 | 0.00012900  |
| C   | -7.00840300  | -2.04930300 | 0.00017700  |
| O   | -5.61948900  | -0.27649900 | 0.00006800  |
| C   | -5.66963700  | -2.49337000 | 0.00014500  |
| C   | -4.83150600  | -1.40145900 | 0.00008100  |
| C   | -3.41344400  | -1.23293800 | 0.00003000  |
| C   | -2.70952900  | -0.04560400 | -0.00003400 |



|   |              |             |             |
|---|--------------|-------------|-------------|
| C | -1.31656200  | -0.25988100 | -0.00006700 |
| C | -0.91502100  | -1.58256600 | -0.00002900 |
| C | 0.40815000   | -2.12964600 | -0.00004200 |
| C | 0.88554900   | -3.42500600 | -0.00000700 |
| O | 1.45485000   | -1.24586700 | -0.00009900 |
| C | 2.29027000   | -3.29984800 | -0.00004000 |
| C | 2.62517200   | -1.96467900 | -0.00009800 |
| C | 3.85972300   | -1.24672100 | -0.00014900 |
| C | 4.03561100   | 0.12202500  | -0.00021600 |
| C | 5.39991600   | 0.47770900  | -0.00021900 |
| C | 6.29274600   | -0.57673700 | -0.00015900 |
| S | -9.64029600  | -0.02811000 | 0.00022000  |
| S | -2.33339400  | -2.61883900 | 0.00004700  |
| S | 5.40160100   | -2.09027100 | -0.00015100 |
| C | 7.72546900   | -0.55513500 | -0.00012300 |
| C | 8.67710600   | -1.55338400 | -0.00007800 |
| O | 8.33598300   | 0.67153900  | -0.00012600 |
| C | 9.91810500   | -0.87948600 | -0.00006400 |
| C | 9.69491400   | 0.47674800  | -0.00010500 |
| C | 10.54395300  | 1.63128900  | -0.00012700 |
| C | 10.15933200  | 2.95443800  | -0.00026400 |
| S | 12.29371400  | 1.47621900  | -0.00020300 |
| C | 11.28116600  | 3.82240000  | -0.00002000 |
| C | 12.49669900  | 3.20162100  | 0.00027900  |
| H | 13.47758600  | 3.65320500  | 0.00056700  |
| F | -12.76470000 | 0.05947800  | 0.00026500  |
| F | -5.25786300  | -3.76608800 | 0.00017400  |
| F | 3.17436800   | -4.30435100 | -0.00001900 |
| F | 11.12797000  | -1.45305900 | -0.00001900 |
| H | -14.77339700 | 2.12075900  | 0.00021100  |
| H | -7.89872000  | -2.66071600 | 0.00023000  |
| H | 0.31211800   | -4.34026500 | 0.00004100  |
| H | 8.51498600   | -2.62122100 | -0.00006100 |
| F | -6.56935400  | 2.32518900  | 0.00002700  |
| F | -0.45098900  | 0.76235200  | -0.00012700 |
| F | 5.78872800   | 1.76005100  | -0.00025600 |
| F | 11.13616500  | 5.15823400  | 0.00005100  |
| H | -8.99395400  | 3.56216600  | 0.00005200  |
| H | -3.17047400  | 0.93374800  | -0.00005400 |
| H | 3.22419100   | 0.83844900  | -0.00024300 |
| H | 9.12959600   | 3.28838200  | -0.00039600 |
| H | -13.47101200 | 4.56225800  | 0.00007500  |

TFOFS-5

0 1

|   |              |             |            |
|---|--------------|-------------|------------|
| C | -8.33229700  | -1.11272000 | 0.00012800 |
| C | -9.36126300  | -2.02713100 | 0.00018100 |
| C | -10.59217200 | -1.33875600 | 0.00018200 |
| C | -10.25599800 | -0.00006000 | 0.00012800 |
| O | -8.89387300  | 0.14064600  | 0.00009200 |
| C | -11.04105300 | 1.19834200  | 0.00010500 |
| C | -10.62766000 | 2.51621300  | 0.00005400 |
| C | -11.66002000 | 3.47802400  | 0.00003800 |
| C | -12.90827500 | 2.89383500  | 0.00007500 |
| C | -14.18335500 | 3.54851300  | 0.00006400 |
| C | -15.48270800 | 3.10403200  | 0.00010000 |

|   |              |             |             |
|---|--------------|-------------|-------------|
| O | -14.21488900 | 4.92172500  | 0.00000600  |
| C | -16.35296200 | 4.22632400  | 0.00006500  |
| C | -15.52091800 | 5.30666200  | 0.00001100  |
| C | -6.90819900  | -1.21641400 | 0.00010600  |
| C | -5.99035300  | -0.18531100 | 0.00005400  |
| C | -4.66408300  | -0.66204900 | 0.00003900  |
| C | -4.52301500  | -2.03718100 | 0.00008200  |
| C | -3.32989900  | -2.82823000 | 0.00007800  |
| C | -3.11272700  | -4.19179100 | 0.00012300  |
| O | -2.13221700  | -2.16379200 | 0.00002400  |
| C | -1.71083600  | -4.34118100 | 0.00009700  |
| C | -1.12334400  | -3.09600600 | 0.00003800  |
| C | 0.22709900   | -2.63312300 | -0.00000600 |
| C | 0.66856900   | -1.32509600 | -0.00006900 |
| C | 2.07565200   | -1.24489800 | -0.00009200 |
| C | 2.74383100   | -2.45497000 | -0.00004700 |
| C | 4.15142000   | -2.71603600 | -0.00004600 |
| C | 4.88551700   | -3.88522300 | 0.00000100  |
| O | 4.99343700   | -1.63558900 | -0.00010100 |
| C | 6.23418700   | -3.47338000 | -0.00002300 |
| C | 6.28702500   | -2.09781500 | -0.00008800 |
| C | 7.34710000   | -1.14088900 | -0.00013900 |
| C | 7.23765700   | 0.23478600  | -0.00021700 |
| C | 8.49965900   | 0.86354900  | -0.00022000 |
| C | 9.59041500   | 0.01548400  | -0.00014800 |
| S | -12.79622800 | 1.14177500  | 0.00015300  |
| S | -6.11336400  | -2.78329000 | 0.00016000  |
| S | 1.57218700   | -3.76398000 | 0.00001800  |
| S | 9.02943000   | -1.64911600 | -0.00012500 |
| C | 10.98829900  | 0.33018400  | -0.00011100 |
| C | 12.12386500  | -0.45250200 | -0.00005200 |
| O | 11.33516700  | 1.65567800  | -0.00013200 |
| C | 13.20094200  | 0.46081600  | -0.00004800 |
| C | 12.70532900  | 1.74284300  | -0.00011000 |
| C | 13.30029700  | 3.04669200  | -0.00015100 |
| C | 12.65272600  | 4.26297300  | -0.00031400 |
| S | 15.04464400  | 3.25349900  | -0.00023100 |
| C | 13.57289300  | 5.34242900  | -0.00007400 |
| C | 14.88986700  | 4.98397100  | 0.00024500  |
| H | 15.75740900  | 5.62696400  | 0.00053700  |
| F | -15.84887700 | 1.81673600  | 0.00015700  |
| F | -9.19628900  | -3.35460400 | 0.00022600  |
| F | -1.03804600  | -5.49760400 | 0.00012800  |
| F | 7.30586500   | -4.27474000 | 0.00001100  |
| F | 14.50246300  | 0.14647700  | 0.00000400  |
| H | -17.43278600 | 4.21966100  | 0.00008000  |
| H | -11.58180900 | -1.77125300 | 0.00021900  |
| H | -3.85298000  | -4.97820200 | 0.00017000  |
| H | 4.51260400   | -4.89883100 | 0.00004900  |
| H | 12.18300600  | -1.53094200 | -0.00002000 |
| F | -9.33748400  | 2.87540600  | 0.00001600  |
| F | -3.61855900  | 0.17508900  | -0.00001600 |
| F | 2.70981200   | -0.06492100 | -0.00014700 |
| F | 8.61585600   | 2.19850000  | -0.00026900 |
| F | 13.15728100  | 6.62023100  | -0.00001900 |
| H | -11.48618100 | 4.54629200  | -0.00000500 |
| H | -6.25572700  | 0.86405400  | 0.00002200  |

|   |              |             |             |
|---|--------------|-------------|-------------|
| H | 0.01396400   | -0.46304700 | -0.00009500 |
| H | 6.29632100   | 0.76917500  | -0.00025400 |
| H | 11.57637000  | 4.37828600  | -0.00045300 |
| H | -15.69338300 | 6.37171000  | -0.00003000 |

TFOFS-6

0 1

|   |              |             |             |
|---|--------------|-------------|-------------|
| C | 4.82583500   | -3.73645000 | -0.00012800 |
| C | 5.64934000   | -4.83980000 | -0.00017000 |
| C | 6.99356000   | -4.41452800 | -0.00016800 |
| C | 6.93496200   | -3.03489500 | -0.00012200 |
| O | 5.62913000   | -2.62215800 | -0.00009800 |
| C | 7.94570700   | -2.02123700 | -0.00009800 |
| C | 7.80768100   | -0.64579000 | -0.00005200 |
| C | 9.01101700   | 0.08761400  | -0.00003700 |
| C | 10.11723800  | -0.73832400 | -0.00007100 |
| C | 11.49114200  | -0.34978900 | -0.00006600 |
| C | 12.68361700  | -1.03746900 | -0.00009800 |
| O | 11.78796800  | 0.99117400  | -0.00001900 |
| C | 13.75011600  | -0.11467500 | -0.00007200 |
| C | 13.15040600  | 1.12854000  | -0.00002300 |
| C | 3.41064700   | -3.54947600 | -0.00011300 |
| C | 2.72224000   | -2.35261000 | -0.00007700 |
| C | 1.32690700   | -2.54878700 | -0.00006800 |
| C | 0.90784600   | -3.86615300 | -0.00009600 |
| C | 13.67626400  | 2.46111000  | 0.00002300  |
| C | 13.00301700  | 3.66708000  | 0.00007200  |
| C | 13.81780100  | 4.81898200  | 0.00011100  |
| C | 15.15883600  | 4.50099200  | 0.00009000  |
| C | 16.27419400  | 5.40105900  | 0.00011700  |
| C | 17.63664200  | 5.22886200  | 0.00010200  |
| O | 16.02665700  | 6.75207400  | 0.00016800  |
| C | 18.26152500  | 6.50409600  | 0.00014500  |
| C | 17.22770000  | 7.39339100  | 0.00018500  |
| H | 17.18070800  | 8.47129200  | 0.00022500  |
| C | -0.42198400  | -4.39571900 | -0.00009200 |
| C | -0.91550500  | -5.68548800 | -0.00011400 |
| O | -1.45742500  | -3.49898600 | -0.00006200 |
| C | -2.31812200  | -5.54286000 | -0.00009600 |
| C | -2.63665300  | -4.20348200 | -0.00006500 |
| C | -3.86243500  | -3.47186200 | -0.00003900 |
| C | -4.02300500  | -2.10061000 | -0.00001300 |
| C | -5.38276300  | -1.73031300 | 0.00000700  |
| C | -6.28754000  | -2.77528700 | -0.00000200 |
| C | -7.71857400  | -2.73734500 | 0.00001300  |
| C | -8.68104100  | -3.72721200 | 0.00000500  |
| O | -8.31621700  | -1.50457900 | 0.00004000  |
| C | -9.91375400  | -3.04236400 | 0.00003000  |
| C | -9.67772000  | -1.68625800 | 0.00005000  |
| C | -10.51518100 | -0.52958900 | 0.00007700  |
| C | -10.12252100 | 0.79343200  | 0.00009800  |
| C | -11.22666100 | 1.67040800  | 0.00011200  |
| C | -12.46957500 | 1.06713400  | 0.00010400  |
| S | 15.40616600  | 2.76284600  | 0.00002100  |
| S | 9.65352500   | -2.43280300 | -0.00013200 |
| S | 2.31268900   | -4.92124900 | -0.00015000 |

|   |              |             |             |
|---|--------------|-------------|-------------|
| S | -5.41295900  | -4.29902800 | -0.00004300 |
| S | -12.26646800 | -0.67761100 | 0.00009400  |
| C | -13.77164400 | 1.66508000  | 0.00010900  |
| C | -15.04494300 | 1.13514700  | 0.00012400  |
| O | -13.83588900 | 3.03376400  | 0.00008900  |
| C | -15.90891500 | 2.25215500  | 0.00012600  |
| C | -15.15809200 | 3.40342400  | 0.00009900  |
| C | -15.46992100 | 4.80226700  | 0.00008300  |
| C | -14.58477800 | 5.85833900  | 0.00006500  |
| S | -17.13381100 | 5.36543500  | 0.00010800  |
| C | -15.26190900 | 7.10475300  | 0.00003100  |
| C | -16.62448800 | 7.02654300  | 0.00002300  |
| H | -17.34016300 | 7.83516400  | -0.00000900 |
| F | 18.25544400  | 4.04203000  | 0.00005500  |
| F | 12.79021400  | -2.37079800 | -0.00014800 |
| F | 5.21958000   | -6.10657200 | -0.00020800 |
| F | -3.21502200  | -6.53570600 | -0.00010700 |
| F | -11.12979900 | -3.60118500 | 0.00003200  |
| F | -17.24733700 | 2.21471800  | 0.00014400  |
| H | 19.32027100  | 6.71641000  | 0.00014700  |
| H | 14.80667200  | -0.33859300 | -0.00008800 |
| H | 7.87542200   | -5.03801400 | -0.00019500 |
| H | -0.35346000  | -6.60774000 | -0.00013900 |
| H | -8.52883400  | -4.79645000 | -0.00001500 |
| H | -15.32684100 | 0.09251600  | 0.00014000  |
| F | 11.66662100  | 3.75535200  | 0.00008500  |
| F | 6.61539800   | -0.03563900 | -0.00002100 |
| F | 0.47441000   | -1.51571400 | -0.00002800 |
| F | -5.75854700  | -0.44447000 | 0.00003600  |
| F | -11.06393800 | 3.00061400  | 0.00012600  |
| F | -14.59113900 | 8.26917300  | -0.00000600 |
| H | 13.42992800  | 5.82939800  | 0.00015200  |
| H | 9.06023000   | 1.16887300  | 0.00000000  |
| H | 3.19615800   | -1.37950900 | -0.00005400 |
| H | -3.20359300  | -1.39340600 | -0.00000800 |
| H | -9.09080800  | 1.12094100  | 0.00009800  |
| H | -13.50782800 | 5.74889700  | 0.00006400  |
